# Supplementary material for: Cascade reaction of o-enoyl arylisocyanide and o-hydroxy aromatic aldimine: diastereoselective access to a polycyclic spirobenzoxazine chromeno[4,3-b]pyrrole derivative
Source: Royal Society of Chemistry journal article supplement (doi:10.1039/d2cc02454c), 2022-01-01

**Cascade reaction of *o*-enoyl arylisocyanide and *o*-hydroxy aromatic  
aldimine: a diastereoselective access to polycyclic spirobenzoxazine  
chromeno[4,3-*b*]pyrrole derivative**

Yao Xiao,<sup>a</sup> Xin Peng,<sup>a</sup> Jie Shen,<sup>a</sup> Lei Cui,<sup>\*a</sup> Shanya Lu,<sup>a</sup> Xueshun Jia,<sup>a</sup> Chunju Li<sup>b</sup>  
and Jian Li<sup>\*a,c</sup>

<sup>a</sup> Department of Chemistry, College of Sciences & Institute for Sustainable Energy,  
Shanghai University, 99 Shangda Road, Shanghai 200444, P. R. China.

<sup>b</sup> Key Laboratory of Inorganic-Organic Hybrid Functional Material Chemistry,  
Ministry of Education, Tianjin Key Laboratory of Structure and Performance for  
Functional Molecules, College of Chemistry, Tianjin Normal University, Tianjin  
300387, P. R. China.

<sup>c</sup> School of Chemistry and Chemical Engineering, Henan Normal University,  
Xinxiang, Henan 453007, P. R. China, P. R. China.

E-mail: cuilei@shu.edu.cn; lijian@shu.edu.cn

## Supporting Information

### Table of Contents

|                                                                             |            |
|-----------------------------------------------------------------------------|------------|
| <b>1. General Information</b>                                               | <b>S2</b>  |
| <b>2. General Procedure</b>                                                 | <b>S2</b>  |
| <b>3. Characterization Data</b>                                             | <b>S5</b>  |
| <b>4. Synthetic applications</b>                                            | <b>S21</b> |
| <b>5. <sup>1</sup>H NMR and <sup>13</sup>C NMR Spectra of All Compounds</b> | <b>S23</b> |

## 1. General Information

The NMR spectra were recorded on Bruker AC-400 spectrometer (400 MHz for  $^1\text{H}$  NMR and 101 MHz for  $^{13}\text{C}$  NMR) with  $\text{CDCl}_3$  as the solvent and TMS as internal reference.  $^1\text{H}$  NMR spectral data were reported as follows: chemical shift ( $\delta$ , ppm), multiplicity, integration, and coupling constant (Hz).  $^{13}\text{C}$  NMR spectral data were reported in terms of the chemical shift. The following abbreviations were used to indicate multiplicities: s = singlet; d = doublet; t = triplet; q = quartet; m = multiplet. High-resolution mass spectra (HRMS) were recorded on a Bruker Daltonics, Inc. APEXIII 7.0 TESLA FTMS instrument. Melting points were obtained on an X-4 digital melting point apparatus without correction. Purification of products was accomplished by column chromatography packed with silica gel. Unless otherwise stated, all reagents were commercially purchased and used without further purification.

## 2. General Procedure

### 2.1 General procedure for the synthesis of *o*-enoyl arylisocyanide 1

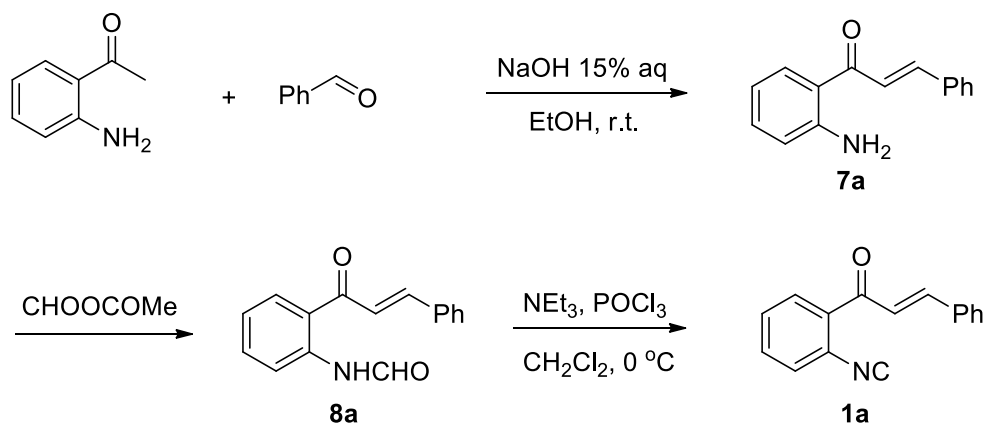

To a solution of 1-(2-aminophenyl)ethanone (1.22 mL, 10 mmol) and benzaldehyde (1.02 mL, 10 mmol) in EtOH (10 mL) was added NaOH (15% aq) (EtOH: NaOH aq = 1:1), the reaction mixture was stirred at room temperature for about 4 h. Upon the consumption of the substrate (monitored by TLC), the reaction was poured slowly into water (50 mL) under stirring, the precipitation was collected by filtration to give **7a** (74% yield) as a yellow solid, it was used in the formylation step directly.

To a solution of **7a** (10 mmol) in DCM (50 mL) was added acetic formic anhydride (25 mmol), the reaction mixture was stirred at room temperature for about 20 minutes. Upon the consumption of the substrate (monitored by TLC), the mixture was washed by saturated aqueous sodium bicarbonate solution and then extracted with CH<sub>2</sub>Cl<sub>2</sub> (3 × 20 mL), the combined organic phase was dried over Na<sub>2</sub>SO<sub>4</sub>, and concentrated in vacuo to give **8a** (96% yield), which was used in the next step without purification.

A solution of **8a** and NEt<sub>3</sub> (3.5 equiv) in CH<sub>2</sub>Cl<sub>2</sub> was cooled at 0 °C, then POCl<sub>3</sub> (1.5 equiv) was added dropwise. After the reaction was completed (monitored by TLC), a saturated Na<sub>2</sub>HCO<sub>3</sub> solution was added at 0 °C to quench the reaction. Then the mixture was extracted with CH<sub>2</sub>Cl<sub>2</sub> (3 × 20 mL), the combined organic phase was dried over Na<sub>2</sub>SO<sub>4</sub>, and concentrated in vacuo. The residue was subjected to column chromatography on silica-gel [eluant: petroleum ether/ethyl ether = 20:1] to give *o*-enoyl arylisocyanide (**1a**, 72% yield) as a pale yellow solid.

## 2.2 General procedure for the synthesis of product 3

Under air atmosphere, a sealable reaction tube equipped with a magnetic stir bar was charged with *o*-enoyl arylisocyanide **1** (0.5 mmol), *o*-hydroxy aromatic aldimine **2** (0.6 mmol) and NaOH (1 mmol) in 5 mL of DCM at room temperature. After completion of the reaction, the reaction mixture was concentrated under vacuum. The residue was purified by thin layer chromatography [eluant: petroleum ether/ethyl acetate = 2:1] to afford the desired product **3**.

### 3. Characterization Data

#### Spectroscopic Data of All Compounds

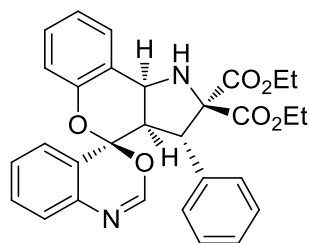

**(3a)** 250 mg, 98% yield, yellow solid: m. p. 156-158 °C.  $^1\text{H}$  NMR (400 MHz, CHLOROFORM-*D*)  $\delta$  7.56 (dd,  $J = 7.7$ , 1.7 Hz, 1H), 7.41-7.32 (m, 2H), 7.25-7.17 (m, 4H), 7.15-7.09 (m, 4H), 7.02 (ddd,  $J = 8.5$ , 5.7, 3.2 Hz, 1H), 6.90 (t,  $J = 8.0$  Hz, 2H), 5.28 (d,  $J = 7.7$  Hz, 1H), 4.42 (d,  $J = 3.8$  Hz, 1H), 4.25 (dq,  $J = 10.6$ , 7.1 Hz, 1H), 4.08 (dq,  $J = 10.8$ , 7.2 Hz, 1H), 3.75 (dq,  $J = 10.8$ , 7.1 Hz, 1H), 3.58 (dd,  $J = 7.8$ , 3.9 Hz, 1H), 3.46 (s, 1H), 3.35 (dq,  $J = 10.8$ , 7.2 Hz, 1H), 1.20 (t,  $J = 7.1$  Hz, 3H), 0.73 (t,  $J = 7.1$  Hz, 3H).  $^{13}\text{C}$  NMR (101 MHz, CHLOROFORM-*D*)  $\delta$  171.02, 169.06, 150.11, 147.86, 140.06, 138.07, 130.77, 129.58, 129.45, 128.54, 128.47, 127.61, 127.34, 125.95, 124.62, 123.13, 123.02, 122.62, 118.10, 98.40, 78.15, 62.23, 61.75, 56.32, 53.36, 50.52, 13.98, 13.43. HRMS (ESI): Calcd. for  $\text{C}_{30}\text{H}_{29}\text{N}_2\text{O}_6$   $[\text{M} + \text{H}]^+$  513.2020, Found: 513.2024.

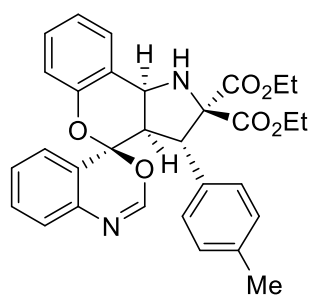

**(3b)** 236 mg, 90% yield, yellow solid: m. p. 160-162 °C.  $^1\text{H}$  NMR (400 MHz, CHLOROFORM-*D*)  $\delta$  7.56 (dd,  $J = 7.8$ , 1.7 Hz, 1H), 7.40-7.33 (m, 2H), 7.23 (dd,  $J = 7.8$ , 1.7 Hz, 1H), 7.12 (d,  $J = 7.9$  Hz, 2H), 7.05 (ddd,  $J = 8.4$ , 6.1, 2.4 Hz, 1H), 7.01-6.99 (m, 4H), 6.91 (dd,  $J = 16.7$ , 7.9 Hz, 2H), 5.27 (d,  $J = 7.7$  Hz, 1H), 4.39 (d,  $J = 3.7$  Hz, 1H), 4.25 (dq,  $J = 10.9$ , 7.2 Hz, 1H), 4.08 (dq,  $J = 10.7$ , 7.1 Hz, 1H), 3.74 (dq,  $J = 10.6$ , 7.1 Hz, 1H), 3.56 (dd,  $J = 7.8$ , 3.8 Hz, 1H), 3.43 (d,  $J = 4.4$  Hz, 1H), 3.38 (dq,  $J = 10.6$ , 7.1 Hz, 1H), 2.28 (s, 3H), 1.19 (t,  $J = 7.1$  Hz, 3H), 0.75 (t,  $J =$

7.1 Hz, 3H).  $^{13}\text{C}$  NMR (101 MHz, CHLOROFORM-*D*)  $\delta$  171.06, 169.15, 150.12, 147.87, 138.08, 136.94, 136.89, 130.75, 129.56, 129.50, 129.08, 128.38, 127.65, 125.93, 124.64, 123.10, 123.06, 122.63, 118.08, 98.45, 78.20, 62.20, 61.73, 56.34, 53.07, 50.38, 21.12, 13.99, 13.41. HRMS (ESI): Calcd. for  $\text{C}_{31}\text{H}_{31}\text{N}_2\text{O}_6$   $[\text{M} + \text{H}]^+$  527.2177, Found: 527.2178.

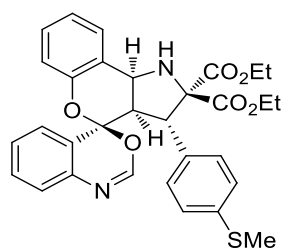

**(3c)** 256 mg, 92% yield, yellow oil.  $^1\text{H}$  NMR (400 MHz, CHLOROFORM-*D*)  $\delta$  7.55 (dd,  $J = 7.7, 1.7$  Hz, 1H), 7.39-7.34 (m, 2H), 7.26-7.17 (m, 2H), 7.12 (dd,  $J = 7.5, 1.2$  Hz, 1H), 7.10-7.05 (m, 5H), 6.91 (ddd,  $J = 17.9, 7.9, 1.3$  Hz, 2H), 5.25 (d,  $J = 7.8$  Hz, 1H), 4.37 (d,  $J = 4.0$  Hz, 1H), 4.24 (dq,  $J = 10.7, 7.2$  Hz, 1H), 4.08 (dq,  $J = 10.7, 7.2$  Hz, 1H), 3.77 (dq,  $J = 10.7, 7.2$  Hz, 1H), 3.54 (dd,  $J = 7.8, 3.9$  Hz, 1H), 3.44-3.39 (m, 2H), 2.43 (s, 3H), 1.19 (t,  $J = 7.1$  Hz, 3H), 0.78 (t,  $J = 7.1$  Hz, 3H).  $^{13}\text{C}$  NMR (101 MHz, CHLOROFORM-*D*)  $\delta$  170.92, 169.05, 150.10, 147.79, 138.04, 137.51, 136.73, 130.79, 129.59, 129.45, 129.26, 129.01, 127.71, 126.53, 126.43, 125.97, 124.59, 123.13, 123.01, 122.55, 118.09, 98.38, 78.13, 62.25, 61.82, 56.34, 52.99, 50.42, 15.84, 13.98, 13.49. HRMS (ESI): Calcd. for  $\text{C}_{31}\text{H}_{31}\text{N}_2\text{O}_6\text{S}$   $[\text{M} + \text{H}]^+$  559.1897, Found: 559.1902.

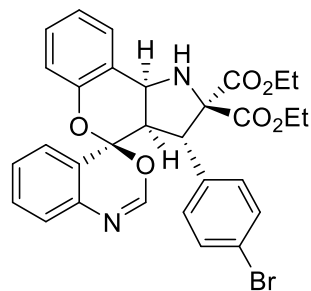

**(3d)** 259 mg, 88% yield, yellow oil.  $^1\text{H}$  NMR (400 MHz, CHLOROFORM-*D*)  $\delta$  7.53 (dd,  $J = 7.6, 1.7$  Hz, 1H), 7.37-7.30 (m, 4H), 7.22 (td,  $J = 7.8, 1.7$  Hz, 1H), 7.12-7.08 (m, 2H), 7.07-6.99 (m, 3H), 6.89 (ddd,  $J = 14.5, 8.0, 1.3$  Hz, 2H), 5.23 (d,  $J = 7.8$  Hz, 1H), 4.37 (d,  $J = 4.1$  Hz, 1H), 4.24 (dq,  $J = 10.8, 7.1$  Hz, 1H),

4.07 (dq,  $J = 10.9, 7.1$  Hz, 1H), 3.79 (dq,  $J = 10.8, 7.1$  Hz, 1H), 3.51 (dd,  $J = 7.9, 4.0$  Hz, 1H), 3.43 (dq,  $J = 10.8, 7.1$  Hz, 1H), 1.18 (t,  $J = 7.1$  Hz, 3H), 0.78 (t,  $J = 7.1$  Hz, 3H).  $^{13}\text{C}$  NMR (101 MHz, CHLOROFORM- $D$ )  $\delta$  170.74, 168.89, 150.04, 147.75, 139.04, 137.98, 131.53, 130.87, 130.31, 129.63, 129.38, 127.74, 126.01, 124.52, 123.19, 122.90, 122.47, 121.30, 118.11, 98.26, 77.98, 62.34, 61.89, 56.29, 52.87, 50.55, 13.98, 13.48. HRMS (ESI): Calcd. for  $\text{C}_{30}\text{H}_{28}\text{BrN}_2\text{O}_6$   $[\text{M} + \text{H}]^+$  591.1125, Found: 591.1128.

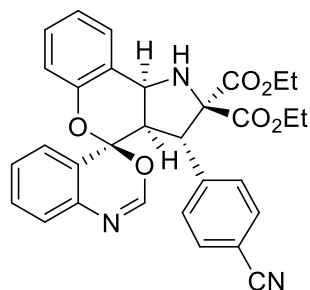

**(3e)** 249 mg, 93% yield, yellow oil.  $^1\text{H}$  NMR (400 MHz, CHLOROFORM- $D$ )  $\delta$  7.55-7.48 (m, 3H), 7.39-7.33 (m, 2H), 7.25 (t,  $J = 8.1$  Hz, 3H), 7.14-7.09 (m, 2H), 7.03 (ddd,  $J = 7.8, 6.8, 1.9$  Hz, 1H), 6.88 (ddd,  $J = 7.5, 5.5, 1.1$  Hz, 2H), 5.26 (d,  $J = 7.9$  Hz, 1H), 4.44 (d,  $J = 4.3$  Hz, 1H), 4.26 (dq,  $J = 10.8, 7.1$  Hz, 1H), 4.09 (dq,  $J = 10.8, 7.2$  Hz, 1H), 3.81 (dq,  $J = 10.7, 7.1$  Hz, 1H), 3.54 (dd,  $J = 7.9, 4.3$  Hz, 1H), 3.41 (dq,  $J = 10.7, 7.1$  Hz, 1H), 1.20 (t,  $J = 7.1$  Hz, 3H), 0.78 (t,  $J = 7.2$  Hz, 3H).  $^{13}\text{C}$  NMR (101 MHz, CHLOROFORM- $D$ )  $\delta$  170.43, 168.63, 149.97, 147.66, 145.44, 137.93, 132.20, 131.01, 129.84, 129.75, 129.50, 129.27, 127.74, 126.15, 124.37, 123.32, 122.75, 122.31, 118.56, 118.19, 111.29, 98.07, 77.97, 62.54, 61.95, 56.32, 53.38, 50.82, 13.98, 13.54. HRMS (ESI): Calcd. for  $\text{C}_{31}\text{H}_{28}\text{N}_3\text{O}_6$   $[\text{M} + \text{H}]^+$  538.1973, Found: 538.1969.

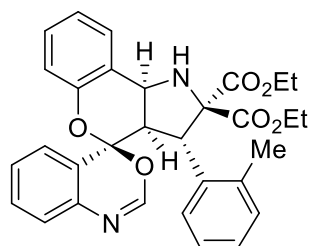

**(3f)** 226 mg, 86% yield, yellow solid: m. p. 169-171  $^{\circ}\text{C}$ .  $^1\text{H}$  NMR (400 MHz, CHLOROFORM- $D$ )  $\delta$  7.56 (dd,  $J = 7.6, 1.6$  Hz, 1H), 7.44-7.37 (m, 2H), 7.25-7.22 (m, 1H),

7.18-7.10 (m, 4H), 7.08-7.03 (m, 2H), 6.95 (d,  $J = 7.5$  Hz, 1H), 6.92-6.88 (m, 2H), 5.26 (d,  $J = 7.6$  Hz, 1H), 4.76 (d,  $J = 3.0$  Hz, 1H), 4.29-4.19 (m, 1H), 4.08-4.00 (m, 1H), 3.78-3.67 (m, 1H), 3.55 (s, 1H), 3.43 (dd,  $J = 7.7, 3.1$  Hz, 1H), 3.32-3.22 (m, 1H), 1.85 (s, 3H), 1.17 (td,  $J = 7.2, 0.8$  Hz, 3H), 0.69 (td,  $J = 7.2, 0.8$  Hz, 3H).  $^{13}\text{C}$  NMR (101 MHz, CHLOROFORM-*D*)  $\delta$  171.27, 169.18, 150.18, 148.13, 139.84, 138.20, 137.74, 130.82, 130.13, 129.64, 129.59, 127.68, 127.07, 126.84, 126.32, 125.98, 124.69, 123.12, 123.10, 122.57, 118.13, 98.35, 78.47, 62.21, 61.74, 56.77, 53.21, 47.92, 19.46, 13.93, 13.32. HRMS (ESI): Calcd. for  $\text{C}_{31}\text{H}_{31}\text{N}_2\text{O}_6$   $[\text{M} + \text{H}]^+$  527.2177, Found: 527.2175.

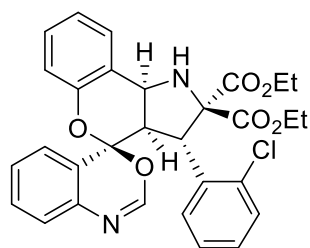

**(3g)** 245 mg, 90% yield, yellow solid: m. p. 202-204 °C.  $^1\text{H}$  NMR (400 MHz, CHLOROFORM-*D*)  $\delta$  7.56 (dd,  $J = 7.7, 1.6$  Hz, 1H), 7.42-7.34 (m, 2H), 7.30 (dd,  $J = 8.2, 1.7$  Hz, 1H), 7.25-7.17 (m, 3H), 7.14-7.03 (m, 4H), 6.89 (ddd,  $J = 7.7, 5.0, 1.2$  Hz, 2H), 5.21 (d,  $J = 8.0$  Hz, 1H), 5.16 (d,  $J = 3.5$  Hz, 1H), 4.21 (dq,  $J = 10.8, 7.2$  Hz, 1H), 4.07 (dq,  $J = 10.6, 7.1$  Hz, 1H), 3.81 (dq,  $J = 10.6, 7.1$  Hz, 1H), 3.54 (s, 1H), 3.45-3.33 (m, 2H), 1.17 (t,  $J = 7.1$  Hz, 3H), 0.76 (t,  $J = 7.2$  Hz, 3H).  $^{13}\text{C}$  NMR (101 MHz, CHLOROFORM-*D*)  $\delta$  170.83, 168.58, 150.17, 147.74, 138.92, 138.13, 135.32, 130.81, 129.63, 129.58, 129.52, 128.56, 128.40, 127.63, 127.02, 126.12, 124.42, 123.11, 122.93, 122.45, 118.17, 98.06, 78.16, 62.29, 61.82, 56.60, 53.51, 48.50, 13.96, 13.42. HRMS (ESI): Calcd. for  $\text{C}_{30}\text{H}_{28}\text{ClN}_2\text{O}_6$   $[\text{M} + \text{H}]^+$  547.1630, Found: 547.1629.

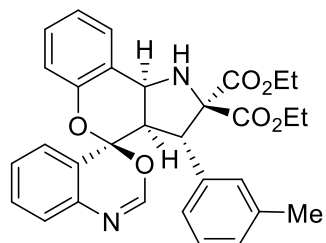



**(3h)** 241 mg, 92% yield, yellow solid: m. p. 210-212 °C. <sup>1</sup>H NMR (400 MHz, CHLOROFORM-*D*) δ 7.57 (dd, *J* = 7.7, 1.7 Hz, 1H), 7.43-7.31 (m, 2H), 7.27-7.19 (m, 1H), 7.17-7.00 (m, 4H), 6.99 (d, *J* = 7.6 Hz, 1H), 6.97-6.85 (m, 4H), 5.27 (d, *J* = 7.7 Hz, 1H), 4.39 (d, *J* = 3.8 Hz, 1H), 4.32-4.20 (m, 1H), 4.16-4.04 (m, 1H), 3.79-3.71 (m, 1H), 3.57 (dd, *J* = 7.8, 3.9 Hz, 1H), 3.49-3.32 (m, 2H), 2.25 (s, 3H), 1.20 (td, *J* = 7.0, 0.8 Hz, 3H), 0.74 (td, *J* = 7.1, 0.7 Hz, 3H). <sup>13</sup>C NMR (101 MHz, CHLOROFORM-*D*) δ 171.03, 169.11, 150.15, 147.85, 140.00, 138.10, 137.94, 130.73, 129.56, 129.48, 129.23, 128.33, 128.00, 127.60, 125.93, 125.54, 124.67, 123.09, 122.64, 118.09, 98.45, 78.16, 62.19, 61.70, 56.36, 53.30, 50.52, 21.41, 13.98, 13.40. HRMS (ESI): Calcd. for C<sub>31</sub>H<sub>31</sub>N<sub>2</sub>O<sub>6</sub> [M + H]<sup>+</sup> 527.2177, Found: 527.2174.

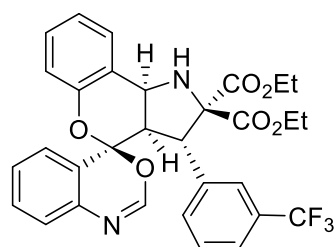

**(3i)** 278 mg, 96% yield, yellow solid: m. p. 189-191 °C. <sup>1</sup>H NMR (400 MHz, CHLOROFORM-*D*) δ 7.55 (dt, *J* = 6.0, 3.2 Hz, 1H), 7.45 (dt, *J* = 6.7, 1.9 Hz, 1H), 7.40-7.30 (m, 5H), 7.27-7.21 (m, 1H), 7.16-7.08 (m, 2H), 7.05-6.98 (m, 1H), 6.93-6.86 (m, 2H), 5.33-5.26 (m, 1H), 4.47-4.45 (m, 1H), 4.32-4.20 (m, 1H), 4.16-4.06 (m, 1H), 3.82-3.73 (m, 1H), 3.59-3.55 (m, 1H), 3.49-3.44 (m, 1H), 3.44-3.37 (m, 1H), 1.20 (td, *J* = 7.1, 3.8 Hz, 3H), 0.74 (td, *J* = 7.1, 3.8 Hz, 3H). <sup>13</sup>C NMR (101 MHz, CHLOROFORM-*D*) δ 170.62, 168.80, 150.03, 147.68, 140.97, 137.96, 132.16, 130.91, 130.75(q, *J* = 32.3 Hz), 129.65, 129.29, 129.01, 127.67, 126.09, 125.25 (q, *J* = 5.1 Hz), 124.47, 124.21 (q, *J* = 4.0 Hz), 123.94(q, *J* = 273.7 Hz), 123.26, 122.82, 118.17, 98.17, 77.93, 62.42, 61.87, 56.19, 53.17, 50.87, 13.96, 13.32. HRMS (ESI): Calcd. for C<sub>31</sub>H<sub>28</sub>F<sub>3</sub>N<sub>2</sub>O<sub>6</sub> [M + H]<sup>+</sup> 581.1894, Found: 581.1899.

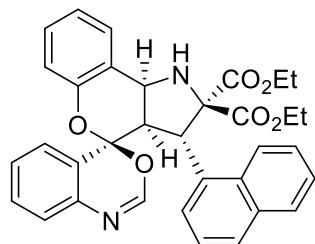

**(3j)** 266 mg, 95% yield, yellow solid: m. p. 201-203 °C.  $^1\text{H}$  NMR (400 MHz, CHLOROFORM-*D*)  $\delta$  8.06 (d,  $J = 8.6$  Hz, 1H), 7.72 (ddd,  $J = 10.2, 8.1, 1.4$  Hz, 2H), 7.60 (dd,  $J = 7.4, 1.6$  Hz, 1H), 7.45-7.35 (m, 3H), 7.34-7.25 (m, 4H), 7.19 (td,  $J = 7.6, 1.8$  Hz, 1H), 7.15 (d,  $J = 5.0$  Hz, 2H), 6.92 (d,  $J = 8.0$  Hz, 1H), 6.83-6.73 (m, 2H), 5.45 (d,  $J = 3.2$  Hz, 1H), 5.38 (d,  $J = 7.6$  Hz, 1H), 4.24 (dq,  $J = 10.9, 7.2$  Hz, 1H), 4.06 (dq,  $J = 10.9, 7.1$  Hz, 1H), 3.65 (dd,  $J = 7.7, 3.2$  Hz, 1H), 3.51 (dq,  $J = 10.8, 7.1$  Hz, 1H), 2.93 (dq,  $J = 10.5, 7.1$  Hz, 1H), 1.16 (t,  $J = 7.2$  Hz, 3H), 0.22 (t,  $J = 7.1$  Hz, 3H).  $^{13}\text{C}$  NMR (101 MHz, CHLOROFORM-*D*)  $\delta$  171.08, 169.31, 150.33, 148.00, 138.10, 137.98, 133.44, 132.43, 130.64, 129.67, 128.19, 128.00, 127.63, 126.33, 125.90, 125.77, 125.08, 124.63, 124.37, 123.89, 123.10, 123.00, 122.50, 118.13, 98.57, 78.69, 62.30, 61.46, 56.92, 53.58, 46.67, 13.93, 12.79. HRMS (ESI): Calcd. for  $\text{C}_{34}\text{H}_{31}\text{N}_2\text{O}_6$   $[\text{M} + \text{H}]^+$  563.2177, Found: 563.2180.

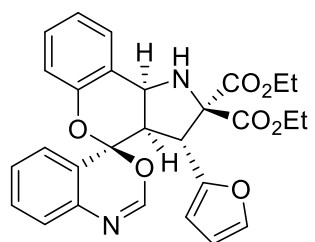

**(3k)** 218 mg, 87% yield, yellow solid: m. p. 160-162 °C.  $^1\text{H}$  NMR (400 MHz, CHLOROFORM-*D*)  $\delta$  7.51 (dt,  $J = 7.7, 2.8$  Hz, 1H), 7.43-7.32 (m, 2H), 7.30-7.27 (m, 1H), 7.25-7.18 (m, 1H), 7.18-7.07 (m, 3H), 7.05-7.02 (m, 1H), 6.90-6.84 (m, 1H), 6.21-6.18 (m, 1H), 5.96-5.94 (m, 1H), 5.21-5.18 (m, 1H), 4.47-4.45 (m, 1H), 4.31-4.19 (m, 1H), 4.14-3.96 (m, 2H), 3.81-3.70 (m, 2H), 3.47 (s, 1H), 1.23-1.17 (m, 3H), 1.03-0.97 (m, 3H).  $^{13}\text{C}$  NMR (101 MHz, CHLOROFORM-*D*)  $\delta$  170.65, 168.59, 151.68, 149.93, 147.75, 141.88, 137.99, 130.83, 129.43, 129.10, 127.56, 125.98, 124.54, 123.22, 123.04, 122.94, 118.11, 110.76, 108.48, 97.85, 75.84, 62.34, 62.31,

55.07, 47.27, 46.90, 13.98, 13.77. HRMS (ESI): Calcd. for  $C_{28}H_{27}N_2O_7$   $[M + H]^+$   
503.1813, Found: 503.1825.

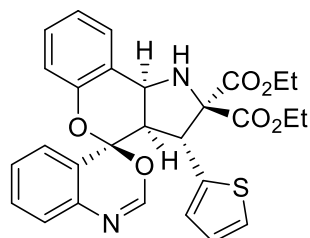

**(3l)** 217 mg, 84% yield, yellow solid: m. p. 157-159 °C.  $^1H$   
NMR (400 MHz, CHLOROFORM-*D*)  $\delta$  7.58-7.51 (m, 1H),  
7.43-7.33 (m, 2H), 7.26-7.21 (m, 1H), 7.14-7.07 (m, 5H),  
6.89 (dd,  $J = 8.2, 1.4$  Hz, 1H), 6.86-6.81 (m, 2H), 5.28 (d,  $J = 7.7$  Hz, 1H), 4.64 (d,  $J$   
 $= 4.3$  Hz, 1H), 4.26 (dq,  $J = 10.8, 7.1, 1.2$  Hz, 1H), 4.12 (dq,  $J = 10.8, 7.2, 1.2$  Hz,  
1H), 3.88 (dq,  $J = 10.7, 7.1, 1.2$  Hz, 1H), 3.68-3.59 (m, 2H), 3.45 (s, 1H), 1.22 (td,  $J$   
 $= 7.1, 1.3$  Hz, 3H), 0.90 (td,  $J = 7.2, 1.3$  Hz, 3H).  $^{13}C$  NMR (101 MHz,  
CHLOROFORM-*D*)  $\delta$  170.64, 169.00, 150.01, 147.58, 142.28, 137.95, 130.87,  
129.57, 129.37, 127.71, 126.90, 126.29, 126.03, 124.68, 124.45, 123.19, 122.94,  
122.63, 118.10, 98.16, 77.98, 62.34, 62.02, 55.58, 51.79, 48.68, 14.00, 13.62. HRMS  
(ESI): Calcd. for  $C_{28}H_{27}N_2O_6S$   $[M + H]^+$  519.1584, Found: 519.1599.

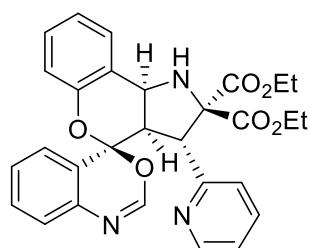

**(3m)** 230 mg, 90% yield, yellow solid: m. p. 178-180 °C.  $^1H$   
NMR (400 MHz, CHLOROFORM-*D*)  $\delta$  8.54-8.50 (m, 1H),  
7.54-7.47 (m, 1H), 7.44-7.37 (m, 1H), 7.33-7.27 (m, 2H),  
7.25-7.13 (m, 2H), 7.12-7.04 (m, 2H), 7.02-6.91 (m, 2H), 6.90-6.83 (m, 2H),  
5.30-5.24 (m, 1H), 4.52-4.45 (m, 1H), 4.29-4.19 (m, 1H), 4.13-4.01 (m, 2H),  
3.91-3.80 (m, 1H), 3.57-3.56 (m, 1H), 3.51-3.40 (m, 1H), 1.18 (dt,  $J = 9.4, 7.1$  Hz,  
3H), 0.75 (dt,  $J = 9.5, 7.1$  Hz, 3H).  $^{13}C$  NMR (101 MHz, CHLOROFORM-*D*)  $\delta$   
170.55, 168.90, 158.90, 150.02, 149.28, 148.19, 138.11, 136.31, 130.64, 129.24,  
129.05, 127.32, 125.82, 125.06, 124.80, 123.49, 123.17, 123.14, 122.13, 118.09,

98.20, 76.93, 62.25, 61.78, 55.26, 54.41, 48.55, 13.96, 13.51. HRMS (ESI): Calcd. for  $C_{29}H_{28}N_3O_6$   $[M + H]^+$  514.1973, Found: 514.1985.

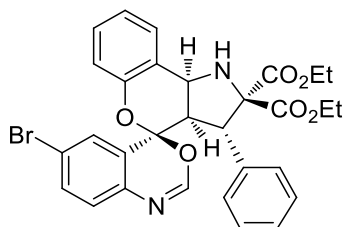

**(3n)** 268 mg, 91% yield, yellow solid: m. p. 185-187 °C.

$^1H$  NMR (400 MHz, CHLOROFORM-*D*)  $\delta$  7.56-7.51 (m, 1H), 7.45 (dt,  $J = 8.4, 1.5$  Hz, 1H), 7.26-7.19 (m, 5H), 7.15-7.11 (m, 4H), 7.00 (d,  $J = 2.1$  Hz, 1H), 6.88 (dd,  $J = 8.1, 1.2$  Hz, 1H), 5.29 (d,  $J = 8.0$  Hz, 1H), 4.37 (d,  $J = 4.3$  Hz, 1H), 4.25 (dq,  $J = 10.7, 7.1$  Hz, 1H), 4.07 (dq,  $J = 10.8, 7.1$  Hz, 1H), 3.79 (dq,  $J = 10.7, 7.1$  Hz, 1H), 3.51 (dd,  $J = 8.1, 4.4$  Hz, 1H), 3.47 (s, 1H), 3.40 (dq,  $J = 10.7, 7.1$  Hz, 1H), 1.19 (t,  $J = 7.1$  Hz, 3H), 0.72 (t,  $J = 7.1$  Hz, 3H).  $^{13}C$  NMR (101 MHz, CHLOROFORM-*D*)  $\delta$  171.11, 168.89, 149.79, 148.30, 139.60, 137.20, 133.81, 129.60, 129.23, 128.63, 128.41, 128.09, 127.58, 127.49, 124.60, 123.41, 122.89, 120.39, 118.10, 97.71, 77.70, 62.23, 61.81, 55.69, 52.94, 50.69, 13.96, 13.42. HRMS (ESI): Calcd. for  $C_{30}H_{28}BrN_2O_6$   $[M + H]^+$  591.1125, Found: 591.1136.

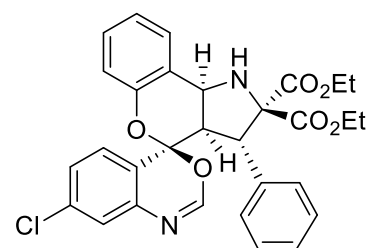

**(3o)** 256 mg, 94% yield, yellow solid: m. p. 177-179 °C.

$^1H$  NMR (400 MHz, CHLOROFORM-*D*)  $\delta$  7.54 (dd,  $J = 7.6, 1.7$  Hz, 1H), 7.33-7.27 (m, 2H), 7.26-7.19 (m, 4H), 7.15-7.10 (m, 4H), 6.90-6.84 (m, 2H), 5.28 (d,  $J = 8.0$  Hz, 1H), 4.38 (d,  $J = 4.4$  Hz, 1H), 4.25 (dq,  $J = 10.8, 7.1$  Hz, 1H), 4.07 (dq,  $J = 10.8, 7.2$  Hz, 1H), 3.78 (dq,  $J = 10.7, 7.1$  Hz, 1H), 3.53-3.43 (m, 2H), 3.38 (dq,  $J = 10.7, 7.1$  Hz, 1H), 1.19 (t,  $J = 7.1$  Hz, 3H), 0.72 (t,  $J = 7.2$  Hz, 3H).  $^{13}C$  NMR (101 MHz, CHLOROFORM-*D*)  $\delta$  171.09, 168.92, 149.82, 148.15, 139.61, 136.77, 132.70, 130.86, 129.59, 129.26, 128.60,

128.41, 127.55, 127.24, 125.09, 124.36, 123.39, 122.84, 118.08, 97.87, 77.76, 62.22, 61.79, 55.77, 52.96, 50.76, 13.96, 13.41. HRMS (ESI): Calcd. for C<sub>30</sub>H<sub>28</sub>ClN<sub>2</sub>O<sub>6</sub> [M + H]<sup>+</sup> 547.1630, Found: 547.1641.

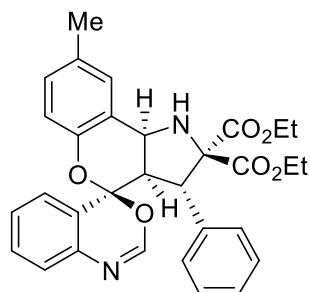

**(4a)** 239 mg, 91% yield, yellow solid: m. p. 193-195 °C. <sup>1</sup>H NMR (400 MHz, CHLOROFORM-*D*) δ 7.39-7.32 (m, 3H), 7.22-7.15 (m, 3H), 7.15-7.09 (m, 3H), 7.05-6.97 (m, 2H), 6.90 (d, *J* = 7.8 Hz, 1H), 6.78 (d, *J* = 8.2 Hz, 1H), 5.24 (d, *J* = 7.8 Hz, 1H), 4.41 (d, *J* = 3.8 Hz, 1H), 4.24 (dq, *J* = 10.6, 7.1 Hz, 1H), 4.08 (dq, *J* = 10.5, 7.1 Hz, 1H), 3.74 (dq, *J* = 10.5, 7.1 Hz, 1H), 3.56 (dd, *J* = 7.9, 3.9 Hz, 1H), 3.42 (d, *J* = 7.3 Hz, 1H), 3.34 (dq, *J* = 10.6, 7.1 Hz, 1H), 2.33 (s, 3H), 1.19 (t, *J* = 7.1 Hz, 3H), 0.73 (t, *J* = 7.1 Hz, 3H). <sup>13</sup>C NMR (101 MHz, CHLOROFORM-*D*) δ 170.95, 169.06, 147.87, 140.08, 138.09, 132.54, 130.69, 130.18, 129.69, 128.54, 128.43, 127.54, 127.30, 125.90, 124.64, 123.13, 122.30, 117.82, 98.48, 78.23, 62.17, 61.69, 56.41, 53.50, 50.65, 20.71, 13.98, 13.44. HRMS (ESI): Calcd. for C<sub>31</sub>H<sub>31</sub>N<sub>2</sub>O<sub>6</sub> [M + H]<sup>+</sup> 527.2177, Found: 527.2188.

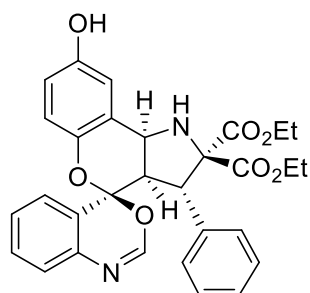

**(4b)** 221 mg, 84% yield, yellow solid: m. p. 130-132 °C. <sup>1</sup>H NMR (400 MHz, CHLOROFORM-*D*) δ 7.36 (dd, *J* = 4.0, 1.0 Hz, 2H), 7.22-7.18 (m, 3H), 7.15-7.10 (m, 3H), 7.05-6.99 (m, 2H), 6.91 (d, *J* = 7.8 Hz, 1H), 6.74 (d, *J* = 1.7 Hz, 2H), 5.23 (d, *J* = 7.8 Hz, 1H), 4.41 (d, *J* = 3.7 Hz, 1H), 4.31-4.22 (m, 1H), 4.16-4.06 (m, 1H), 3.81-3.71 (m, 1H), 3.55 (dd, *J* = 8.0, 3.6 Hz, 1H), 3.39-3.29 (m, 1H), 1.19 (td, *J* = 7.1, 1.3 Hz, 3H), 0.72 (td, *J* = 7.1, 1.2 Hz, 3H). <sup>13</sup>C NMR (101 MHz,

CHLOROFORM-*D*)  $\delta$  171.06, 169.01, 152.01, 148.28, 143.40, 139.97, 137.87, 134.42, 130.78, 128.82, 128.65, 128.51, 128.01, 127.65, 127.41, 125.80, 124.64, 123.06, 118.93, 117.25, 115.62, 98.48, 78.18, 62.41, 61.95, 56.57, 53.42, 50.46, 13.98, 13.39. HRMS (ESI): Calcd. for  $C_{30}H_{29}N_2O_7$   $[M + H]^+$  529.1969, Found: 529.1987.

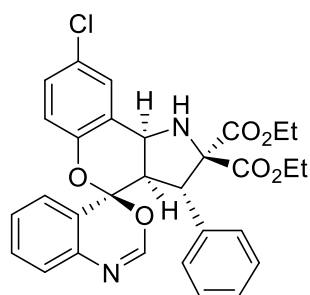

**(4c)** 253 mg, 93% yield, yellow solid: m. p. 200-202 °C.  $^1H$  NMR (400 MHz, CHLOROFORM-*D*)  $\delta$  7.55 (d,  $J = 2.6$  Hz, 1H), 7.42-7.34 (m, 2H), 7.23-7.17 (m, 4H), 7.11 (dd,  $J = 7.4$ , 2.2 Hz, 2H), 7.08 (s, 1H), 7.03 (ddd,  $J = 8.6$ , 6.5, 2.1 Hz, 1H), 6.92-6.89 (m, 1H), 6.83 (d,  $J = 8.7$  Hz, 1H), 5.23 (d,  $J = 7.9$  Hz, 1H), 4.41 (d,  $J = 4.3$  Hz, 1H), 4.26 (dq,  $J = 10.9$ , 7.1 Hz, 1H), 4.09 (dq,  $J = 10.9$ , 7.3 Hz, 1H), 3.76 (dq,  $J = 10.6$ , 7.1 Hz, 1H), 3.58 (dd,  $J = 7.9$ , 4.3 Hz, 1H), 3.46 (s, 1H), 3.36 (dq,  $J = 10.9$ , 7.3 Hz, 1H), 1.21 (t,  $J = 7.2$  Hz, 3H), 0.73 (t,  $J = 7.1$  Hz, 3H).  $^{13}C$  NMR (101 MHz, CHLOROFORM-*D*)  $\delta$  170.93, 168.97, 148.76, 147.58, 139.75, 137.96, 130.91, 129.56, 129.09, 128.51, 128.08, 127.67, 127.43, 126.01, 124.58, 124.54, 122.73, 119.52, 98.45, 77.92, 62.31, 61.86, 55.92, 53.04, 50.45, 13.97, 13.42. HRMS (ESI): Calcd. for  $C_{30}H_{28}ClN_2O_6$   $[M + H]^+$  547.1630, Found: 547.1636.

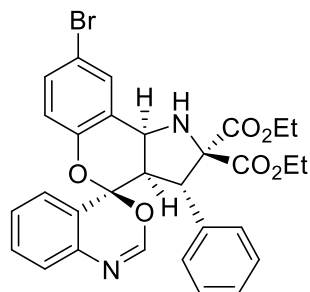

**(4d)** 265 mg, 90% yield, yellow solid: m. p. 196-198 °C.  $^1H$  NMR (400 MHz, CHLOROFORM-*D*)  $\delta$  7.74-7.65 (m, 1H), 7.37-7.31 (m, 3H), 7.20-7.17 (m, 3H), 7.14-7.09 (m, 2H), 7.08-6.98 (m, 2H), 6.93-6.88 (m, 1H), 6.77 (dd,  $J = 8.6$ , 2.1 Hz, 1H), 5.22 (d,  $J = 8.0$  Hz, 1H), 4.40 (d,  $J = 4.2$  Hz, 1H), 4.25 (dq,  $J = 10.7$ , 7.1, 1.3 Hz, 1H), 4.09 (dq,  $J = 10.8$ , 7.1, 1.5 Hz, 1H), 3.75 (dq,  $J = 10.7$ , 7.2, 1.4 Hz,

1H), 3.57 (dd,  $J = 8.1, 4.3$  Hz, 1H), 3.46 (s, 1H), 3.35 (dq,  $J = 10.7, 7.2, 1.2$  Hz, 1H), 1.20 (td,  $J = 7.1, 1.5$  Hz, 3H), 0.72 (td,  $J = 7.2, 1.4$  Hz, 3H).  $^{13}\text{C}$  NMR (101 MHz, CHLOROFORM-*D*)  $\delta$  170.87, 168.97, 149.32, 147.52, 139.73, 137.97, 132.43, 132.04, 130.90, 128.50, 127.66, 127.42, 126.01, 125.13, 124.54, 122.74, 119.92, 115.43, 98.42, 77.93, 62.29, 61.83, 55.86, 53.07, 50.50, 13.98, 13.42. HRMS (ESI): Calcd. for  $\text{C}_{30}\text{H}_{28}\text{BrN}_2\text{O}_6$   $[\text{M} + \text{H}]^+$  591.1125, Found: 591.1138.

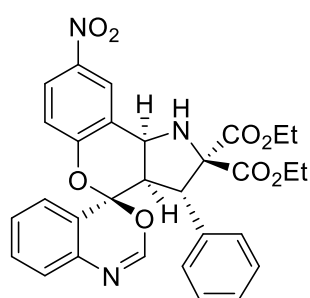

**(4e)** 236 mg, 85% yield, yellow solid: m. p. 222-224 °C.  $^1\text{H}$  NMR (400 MHz, CHLOROFORM-*D*)  $\delta$  8.50 (d,  $J = 2.7$  Hz, 1H), 8.14 (dd,  $J = 9.0, 2.7$  Hz, 1H), 7.42-7.36 (m, 2H), 7.23-7.19 (m, 3H), 7.13-7.10 (m, 2H), 7.09-7.04 (m, 2H),

7.00 (d,  $J = 8.9$  Hz, 1H), 6.92 (dd,  $J = 7.9, 1.3$  Hz, 1H), 5.31 (d,  $J = 7.5$  Hz, 1H), 4.43 (d,  $J = 4.4$  Hz, 1H), 4.25 (dq,  $J = 10.8, 7.1$  Hz, 1H), 4.08 (dq,  $J = 10.8, 7.2$  Hz, 1H), 3.79 (dq,  $J = 10.6, 7.1$  Hz, 1H), 3.65-3.61 (m, 2H), 3.37 (dq,  $J = 10.7, 7.2$  Hz, 1H), 1.20 (t,  $J = 7.1$  Hz, 3H), 0.73 (t,  $J = 7.1$  Hz, 3H).  $^{13}\text{C}$  NMR (101 MHz, CHLOROFORM-*D*)  $\delta$  170.93, 168.86, 155.44, 147.09, 143.22, 139.43, 137.87, 131.24, 128.60, 128.44, 127.87, 127.58, 126.22, 125.60, 125.26, 124.51, 124.22, 122.02, 118.98, 98.82, 77.63, 62.39, 62.01, 55.54, 52.68, 50.28, 13.94, 13.40. HRMS (ESI): Calcd. for  $\text{C}_{30}\text{H}_{28}\text{N}_3\text{O}_8$   $[\text{M} + \text{H}]^+$  558.1871, Found: 558.1885.

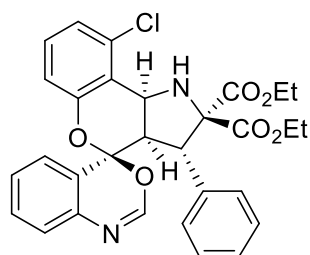

**(4f)** 253 mg, 93% yield, yellow solid: m. p. 159-161 °C.  $^1\text{H}$  NMR (400 MHz, CHLOROFORM-*D*)  $\delta$  7.41-7.36 (m, 2H), 7.23-7.15 (m, 6H), 7.13-7.08 (m, 2H), 7.05-6.99 (m, 1H),

6.90-6.86 (m, 1H), 6.81 (dd,  $J = 7.0, 2.4$  Hz, 1H), 5.41 (d,  $J = 7.9$  Hz, 1H), 4.45 (d,  $J = 3.2$  Hz, 1H), 4.30 (dq,  $J = 10.7, 7.1$  Hz, 1H), 4.25 (s, 1H), 4.04 (dq,  $J = 10.8, 7.2$  Hz, 1H), 3.76 (dq,  $J = 10.6, 7.2$  Hz, 1H), 3.52 (dd,  $J = 7.8, 3.2$  Hz, 1H), 3.33 (dq,  $J = 10.6, 7.2$  Hz, 1H), 1.18 (t,  $J = 7.1$  Hz, 3H), 0.71 (t,  $J = 7.2$  Hz, 3H).  $^{13}\text{C}$  NMR (101 MHz, CHLOROFORM-*D*)  $\delta$  171.73, 168.91, 151.52, 148.10, 140.47, 138.34, 135.07, 130.93, 130.03, 128.58, 127.58, 127.38, 126.05, 124.68, 123.77, 122.30, 121.60, 116.88, 97.79, 77.35, 62.23, 61.84, 54.83, 51.46, 49.71, 13.91, 13.41. HRMS (ESI): Calcd. for  $\text{C}_{30}\text{H}_{28}\text{ClN}_2\text{O}_6$   $[\text{M} + \text{H}]^+$  547.1630, Found: 547.1632.

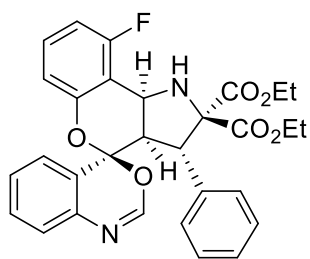

**(4g)** 238 mg, 90% yield, yellow oil.  $^1\text{H}$  NMR (400 MHz, CHLOROFORM-*D*)  $\delta$  7.37-7.34 (m, 2H), 7.22-7.15 (m, 5H), 7.09 (dd,  $J = 7.3, 2.3$  Hz, 2H), 6.98 (ddd,  $J = 7.8, 4.9, 3.7$  Hz, 1H), 6.87-6.81 (m, 2H), 6.69 (d,  $J = 8.3$  Hz, 1H), 5.45 (d,  $J = 8.2$  Hz, 1H), 4.42 (d,  $J = 3.8$  Hz, 1H), 4.27 (dq,  $J = 10.8, 7.1$  Hz, 1H), 4.04 (dq,  $J = 10.7, 7.2$  Hz, 1H), 3.84 (s, 1H), 3.77 (dq,  $J = 10.7, 7.1$  Hz, 1H), 3.55 (dd,  $J = 8.1, 3.7$  Hz, 1H), 3.33 (dq,  $J = 10.6, 7.2$  Hz, 1H), 1.18 (t,  $J = 7.1$  Hz, 3H), 0.70 (t,  $J = 7.1$  Hz, 3H).  $^{13}\text{C}$  NMR (101 MHz, CHLOROFORM-*D*)  $\delta$  171.60, 168.89, 161.80 (d,  $J = 246.3$  Hz, ArF), 148.00, 140.19, 138.20, 130.90, 129.89 (d,  $J = 10.2$  Hz, ArF), 128.84, 128.54, 127.44 (d,  $J = 14.1$  Hz, ArF), 126.00, 124.74, 122.30, 113.74 (d,  $J = 3.1$  Hz, ArF), 112.05 (d,  $J = 21.5$  Hz, ArF), 109.46 (d,  $J = 20.9$  Hz, ArF), 98.04, 77.42, 62.17, 61.78, 51.81, 51.48, 49.47, 13.91, 13.41. HRMS (ESI): Calcd. for  $\text{C}_{30}\text{H}_{28}\text{FN}_2\text{O}_6$   $[\text{M} + \text{H}]^+$  531.1926, Found: 531.1911.



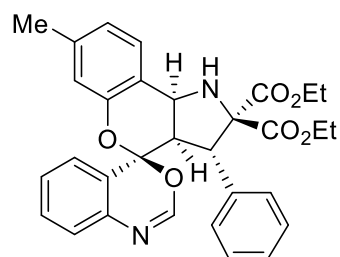

**(4h)** 236 mg, 90% yield, yellow solid: m. p. 175-177 °C.

<sup>1</sup>H NMR (400 MHz, CHLOROFORM-*D*) δ 7.44 (dd, *J* = 7.8, 1.6 Hz, 1H), 7.36-7.34 (m, 2H), 7.21-7.09 (m, 6H), 7.04-6.99 (m, 1H), 6.92 (ddd, *J* = 12.3, 8.1, 1.5 Hz, 2H), 6.71 (d, *J* = 2.1 Hz, 1H), 5.23 (d, *J* = 7.6 Hz, 1H), 4.41 (d, *J* = 3.7 Hz, 1H), 4.24 (dq, *J* = 10.8, 7.1, 1.3 Hz, 1H), 4.09 (dq, *J* = 10.8, 7.1, 1.3 Hz, 1H), 3.73 (dq, *J* = 10.7, 7.1, 1.4 Hz, 1H), 3.55 (dd, *J* = 7.8, 3.8 Hz, 1H), 3.40-3.31 (m, 2H), 2.29 (d, *J* = 1.9 Hz, 3H), 1.19 (td, *J* = 7.1, 1.4 Hz, 3H), 0.72 (td, *J* = 7.1, 1.4 Hz, 3H). <sup>13</sup>C NMR (101 MHz, CHLOROFORM-*D*) δ 170.94, 169.11, 149.94, 147.86, 140.13, 139.83, 138.09, 130.69, 129.22, 128.63, 128.55, 128.43, 127.57, 127.29, 125.91, 124.61, 124.03, 123.16, 119.50, 118.38, 98.52, 78.29, 62.18, 61.69, 56.29, 53.50, 50.65, 21.30, 13.98, 13.43. HRMS (ESI): Calcd. for C<sub>31</sub>H<sub>31</sub>N<sub>2</sub>O<sub>6</sub> [M + H]<sup>+</sup> 527.2177, Found: 527.2170.

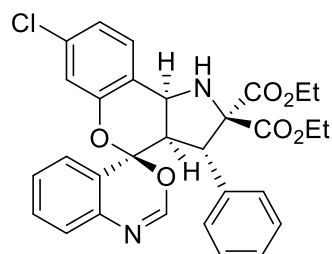

**(4i)** 232 mg, 85% yield, yellow solid: m. p. 169-171 °C.

<sup>1</sup>H NMR (400 MHz, CHLOROFORM-*D*) δ 7.48 (dd, *J* = 8.2, 0.7 Hz, 1H), 7.40-7.34 (m, 2H), 7.21-7.17 (m, 3H), 7.13-7.08 (m, 4H), 7.05-7.00 (m, 1H), 6.90 (dd, *J* = 8.3, 1.6 Hz, 2H), 5.23 (d, *J* = 7.8 Hz, 1H), 4.40 (d, *J* = 4.0 Hz, 1H), 4.25 (dq, *J* = 10.8, 7.1 Hz, 1H), 4.09 (dq, *J* = 10.7, 7.1 Hz, 1H), 3.74 (dq, *J* = 10.7, 7.1 Hz, 1H), 3.57 (dd, *J* = 7.8, 4.0 Hz, 1H), 3.43 (s, 1H), 3.34 (dq, *J* = 10.7, 7.2 Hz, 1H), 1.19 (t, *J* = 7.1 Hz, 3H), 0.72 (t, *J* = 7.2 Hz, 3H). <sup>13</sup>C NMR (101 MHz, CHLOROFORM-*D*) δ 170.94, 168.96, 150.82, 147.50, 139.83, 138.00, 134.69, 130.93, 130.36, 128.72, 128.50, 127.69, 127.42, 126.05, 124.57,

123.42, 122.57, 121.42, 118.40, 98.48, 78.03, 62.28, 61.82, 55.86, 53.19, 50.42, 13.97, 13.41. HRMS (ESI): Calcd. for C<sub>30</sub>H<sub>28</sub>ClN<sub>2</sub>O<sub>6</sub> [M + H]<sup>+</sup> 547.1630, Found: 547.1637.

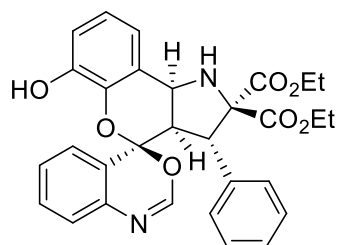

**(4j)** 227mg, 86% yield, yellow oil. <sup>1</sup>H NMR (400 MHz, CHLOROFORM-*D*) δ 7.21-7.14 (m, 5H), 7.11-7.05 (m, 4H), 7.00 (t, *J* = 7.8 Hz, 1H), 6.94 (ddd, *J* = 8.5, 5.6, 3.0 Hz, 1H), 6.91-6.84 (m, 2H), 5.29 (d, *J* = 7.9 Hz, 1H), 4.36 (d, *J* = 4.0 Hz, 1H), 4.23 (dq, *J* = 10.8, 7.1 Hz, 1H), 4.04 (dq, *J* = 10.8, 7.1 Hz, 1H), 3.73 (dq, *J* = 10.7, 7.2 Hz, 1H), 3.60 (dd, *J* = 7.8, 4.0 Hz, 1H), 3.32 (dq, *J* = 10.7, 7.2 Hz, 1H), 1.17 (t, *J* = 7.1 Hz, 3H), 0.70 (t, *J* = 7.2 Hz, 3H). <sup>13</sup>C NMR (101 MHz, CHLOROFORM-*D*) δ 171.07, 168.89, 147.99, 146.06, 139.95, 137.64, 137.47, 130.90, 128.46, 127.49, 127.34, 125.67, 124.72, 123.42, 123.20, 122.25, 119.99, 115.69, 98.51, 77.91, 62.21, 61.74, 56.19, 53.07, 50.64, 13.94, 13.40. HRMS (ESI): Calcd. for C<sub>30</sub>H<sub>29</sub>N<sub>2</sub>O<sub>7</sub> [M + H]<sup>+</sup> 529.1969, Found: 529.1968.

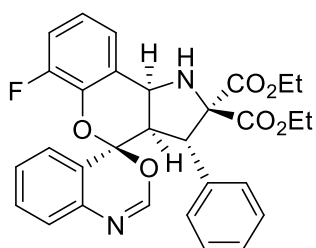

**(4k)** 233 mg, 88% yield, yellow oil. <sup>1</sup>H NMR (400 MHz, CHLOROFORM-*D*) δ 7.41-7.32 (m, 3H), 7.20-7.16 (m, 3H), 7.12-7.07 (m, 3H), 7.06-6.98 (m, 3H), 6.93-6.91 (m, 1H), 5.29 (d, *J* = 7.9 Hz, 1H), 4.40 (d, *J* = 4.0 Hz, 1H), 4.25 (dq, *J* = 10.8, 7.1 Hz, 1H), 4.17 (dq, *J* = 10.7, 7.2 Hz, 1H), 3.75 (dq, *J* = 10.7, 7.1 Hz, 1H), 3.59 (dd, *J* = 7.9, 4.1 Hz, 1H), 3.48 (s, 1H), 3.34 (dq, *J* = 10.7, 7.2 Hz, 1H), 1.19 (t, *J* = 7.1 Hz, 3H), 0.71 (t, *J* = 7.2 Hz, 3H). <sup>13</sup>C NMR (101 MHz, CHLOROFORM-*D*) δ 171.07, 168.92, 152.24 (d, *J* = 248.0 Hz, ArF), 147.38, 139.81, 138.03, 130.92, 128.74 (d, *J* = 6.2 Hz, ArF), 128.49, 128.46, 127.68, 127.41, 126.04, 125.46, 124.83, 124.23 (d, *J* = 3.7 Hz, ArF),

122.79, 122.72, 122.30, 116.05 (d,  $J = 18.1$  Hz, ArF), 98.26, 77.84, 62.27, 61.83, 55.90 (d,  $J = 2.8$  Hz), 53.07, 50.73, 13.96, 13.40. HRMS (ESI): Calcd. for  $C_{30}H_{28}FN_2O_6$   $[M + H]^+$  531.1926, Found: 531.1792.

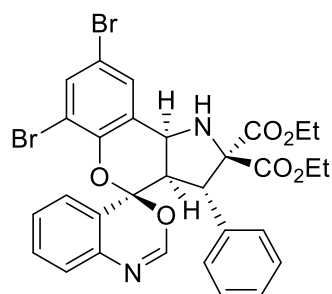

**(4l)** 297 mg, 89% yield, yellow solid: m. p. 220-222 °C.

$^1H$  NMR (400 MHz, CHLOROFORM-*D*)  $\delta$  7.67-7.58 (m, 2H), 7.39-7.32 (m, 2H), 7.18 (dd,  $J = 5.2, 1.9$  Hz, 3H), 7.10-7.07 (m, 2H), 7.06-6.99 (m, 2H), 6.95-6.88 (m, 1H), 5.23 (d,  $J = 8.1$  Hz, 1H), 4.38 (d,  $J = 4.8$  Hz, 1H), 4.24 (dq,  $J = 10.8, 7.1$  Hz, 1H), 4.09 (dq,  $J = 10.8, 7.1$  Hz, 1H), 3.76 (dq,  $J = 10.7, 7.1$  Hz, 1H), 3.65 (dd,  $J = 8.1, 4.8$  Hz, 1H), 3.48 (s, 1H), 3.35 (dq,  $J = 10.6, 7.1$  Hz, 1H), 1.19 (t,  $J = 7.1$  Hz, 3H), 0.71 (t,  $J = 7.1$  Hz, 3H).  $^{13}C$  NMR (101 MHz, CHLOROFORM-*D*)  $\delta$  170.90, 168.89, 147.01, 146.48, 139.31, 137.94, 135.14, 131.01, 130.95, 128.52, 128.47, 127.71, 127.50, 127.04, 126.06, 124.65, 122.34, 115.43, 113.40, 98.70, 77.74, 62.31, 61.93, 55.97, 52.70, 50.65, 13.99, 13.41. HRMS (ESI): Calcd. for  $C_{30}H_{27}Br_2N_2O_6$   $[M + H]^+$  669.0230, Found: 669.0235.

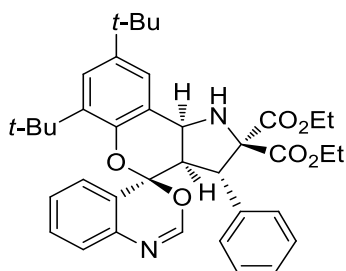

**(4m)** 255 mg, 82% yield, yellow solid: m. p. 147-149 °C.

$^1H$  NMR (400 MHz, CHLOROFORM-*D*)  $\delta$  7.39-7.33 (m, 3H), 7.28 (d,  $J = 2.4$  Hz, 1H), 7.21-7.16 (m, 4H), 7.11 (dd,  $J = 7.4, 2.2$  Hz, 2H), 7.02-6.98 (m, 1H), 6.92 (d,  $J = 7.9$  Hz, 1H), 5.31 (d,  $J = 8.0$  Hz, 1H), 4.41 (d,  $J = 3.7$  Hz, 1H), 4.27 (dq,  $J = 10.8, 7.1$  Hz, 1H), 4.08 (dq,  $J = 10.8, 7.1$  Hz, 1H), 3.75 (dq,  $J = 10.7, 7.1$  Hz, 1H), 3.55 (dd,  $J = 8.0, 3.7$  Hz, 1H), 3.47 (s, 1H), 3.34 (dq,  $J = 10.7, 7.2$  Hz, 1H), 1.34 (s, 9H), 1.19 (m, 12H),



Hz, 1H), 3.34 (s, 1H), 2.95 (dd,  $J = 7.1, 2.6$  Hz, 1H), 2.83 (dd,  $J = 4.8, 2.6$  Hz, 1H), 1.74-1.65 (m, 1H), 1.60 (d,  $J = 11.5$  Hz, 2H), 1.51 (t,  $J = 15.6$  Hz, 2H), 1.30 (t,  $J = 7.1$  Hz, 3H), 1.24 (t,  $J = 7.1$  Hz, 3H), 1.14-1.00 (m, 3H), 0.97-0.88 (m, 1H), 0.68-0.54 (m, 1H), 0.51-0.42 (m, 1H).  $^{13}\text{C}$  NMR (101 MHz, CHLOROFORM-*D*)  $\delta$  171.75, 170.44, 150.12, 147.77, 137.99, 130.80, 130.01, 129.41, 127.56, 126.58, 125.76, 123.23, 122.78, 121.73, 117.81, 99.44, 75.83, 62.26, 62.14, 56.27, 54.25, 47.96, 38.34, 33.51, 30.12, 26.90, 26.68, 26.20, 14.15, 14.04. HRMS (ESI): Calcd. for  $\text{C}_{30}\text{H}_{35}\text{N}_2\text{O}_6$  [ $\text{M} + \text{H}$ ] $^+$  519.2490, Found: 519.2494.

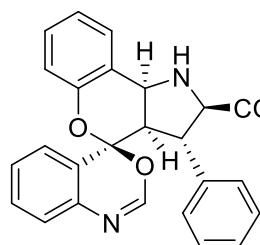

**(6a)** 204 mg, 93% yield, red solid: m. p. 164-166 °C.  $^1\text{H}$  NMR (400 MHz, CHLOROFORM-*D*)  $\delta$  7.65 (dd,  $J = 7.6, 1.7$  Hz, 1H), 7.45-7.36 (m, 2H), 7.29-7.21 (m, 4H), 7.19 (s, 1H), 7.16-7.09 (m, 2H), 6.99-6.95 (m, 3H), 6.91 (dd,  $J = 8.2, 1.2$  Hz, 1H), 4.68 (d,  $J = 7.3$  Hz, 1H), 4.17-4.06 (m, 2H), 3.99 (d,  $J = 7.4$  Hz, 1H), 3.30 (ddd,  $J = 15.5, 7.4, 3.4$  Hz, 2H), 3.14 (s, 1H), 1.14 (t,  $J = 7.1$  Hz, 3H).  $^{13}\text{C}$  NMR (101 MHz, CHLOROFORM-*D*)  $\delta$  172.24, 150.33, 147.79, 142.98, 137.97, 130.90, 130.13, 129.62, 128.97, 127.83, 127.24, 127.13, 125.92, 125.14, 122.99, 122.89, 121.88, 118.03, 98.83, 69.35, 61.35, 57.91, 55.17, 53.64, 14.25. HRMS (ESI): Calcd. for  $\text{C}_{27}\text{H}_{25}\text{N}_2\text{O}_4$  [ $\text{M} + \text{H}$ ] $^+$  441.1809, Found: 441.1818.

## 4. Synthetic applications

### a) Reaction with substituted isocyanide 1'a

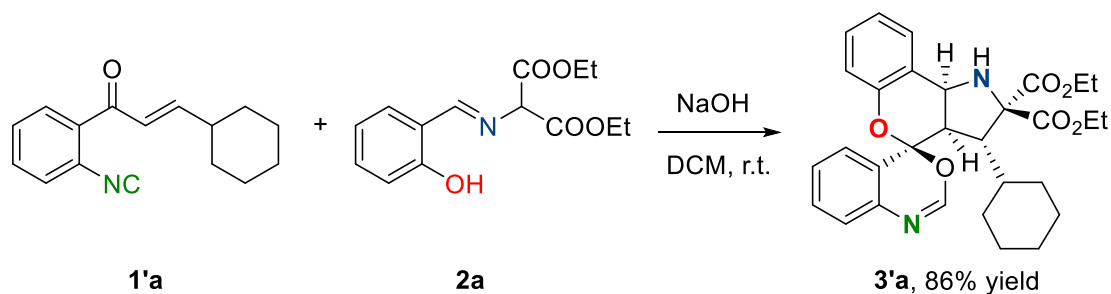

Under air atmosphere, a sealable reaction tube equipped with a magnetic stir bar was charged with isocyanide **1'a** (0.5 mmol, 119.5 mg), *o*-hydroxy aromatic aldimine **2a** (0.6 mmol, 167.4 mg) and NaOH (1 mmol, 40 mg) in 5 mL of DCM at room temperature. After completion of the reaction, the reaction mixture was concentrated under vacuum. The residue was purified by thin layer chromatography [eluant: petroleum ether/ethyl acetate = 2 : 1] to afford the desired product **3'a**. 207 mg, 86% yield, yellow solid.

### b) Reaction with other aldimine esters

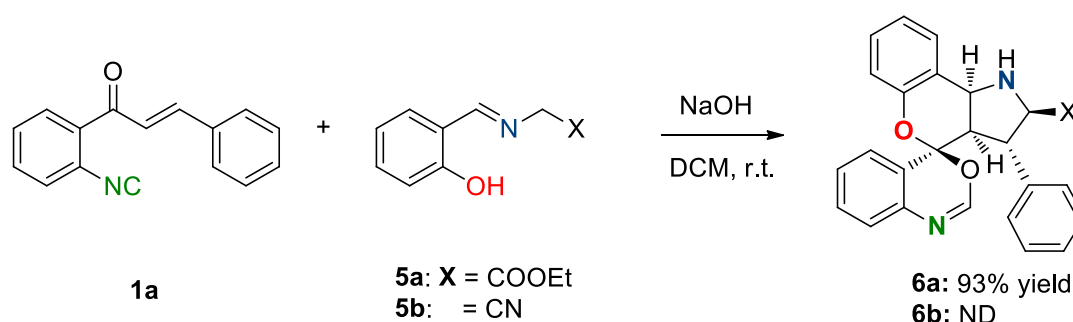

Under air atmosphere, a sealable reaction tube equipped with a magnetic stir bar was charged with *o*-enoyl arylisocyanide **1a** (0.5 mmol, 116.5 mg), aldimine ester **5a** (0.6 mmol, 124.2 mg) and NaOH (1 mmol, 40 mg) in 5 mL of DCM at room temperature. After completion of the reaction, the reaction mixture was concentrated

under vacuum. The residue was purified by thin layer chromatography [eluant: petroleum ether/ethyl acetate = 2 : 1] to afford the desired product **6a**. 204.6 mg, 93% yield, yellow solid.

### c) Reaction with derivative of aldimine ester

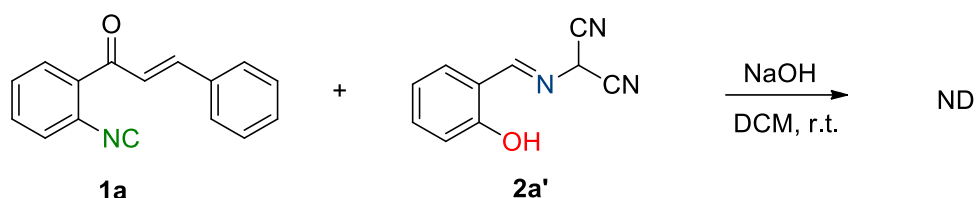

Under air atmosphere, a sealable reaction tube equipped with a magnetic stir bar was charged with *o*-enoyl arylisocyanide **1a** (0.5 mmol, 116.5 mg), derivative of aldimine ester **2a'** (0.6 mmol, 92.5 mg) and NaOH (1 mmol, 40 mg) in 5 mL of DCM at room temperature. After completion of the reaction, the reaction mixture was concentrated under vacuum.

### d) Gram-scale reaction

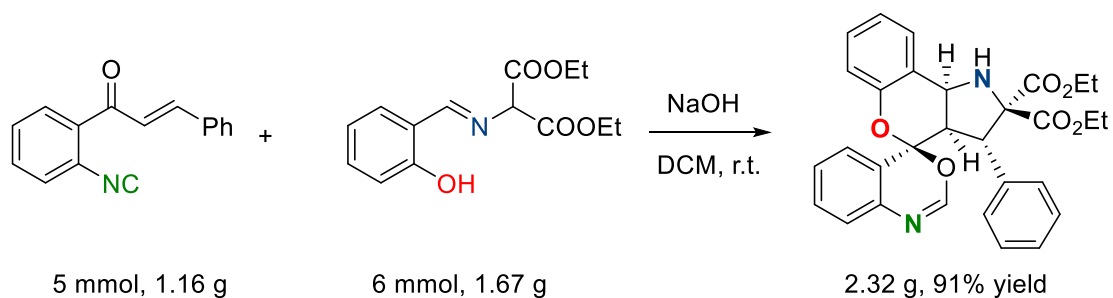

Under air atmosphere, a sealable reaction tube equipped with a magnetic stir bar was charged with *o*-enoyl arylisocyanide **1a** (5 mmol, 1.16 g), *o*-hydroxy aromatic aldimine **2a** (6 mmol, 1.67 g) and NaOH (10 mmol, 0.4 g) in 50 mL of DCM at room temperature. After completion of the reaction, the reaction mixture was concentrated under vacuum. The residue was purified by recrystallization to afford the desired product **3a**. 2.32 g, 91% yield, yellow solid.

## 5. <sup>1</sup>H NMR and <sup>13</sup>C NMR Spectra of All Compounds

### Compound 3a

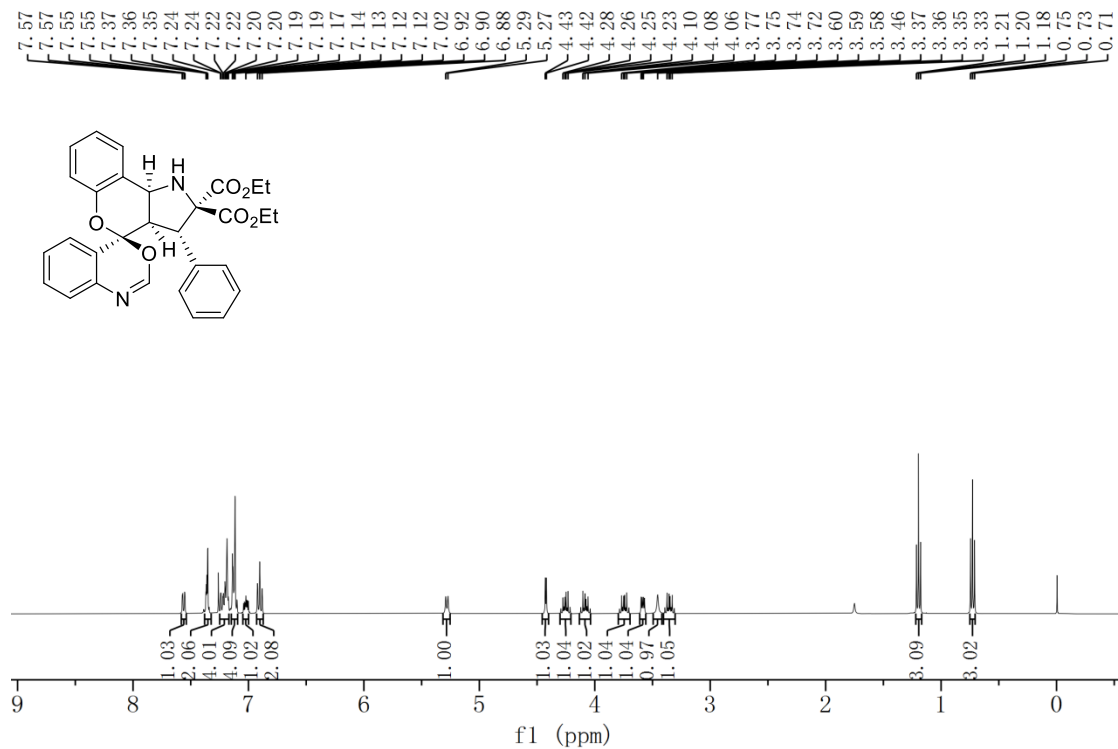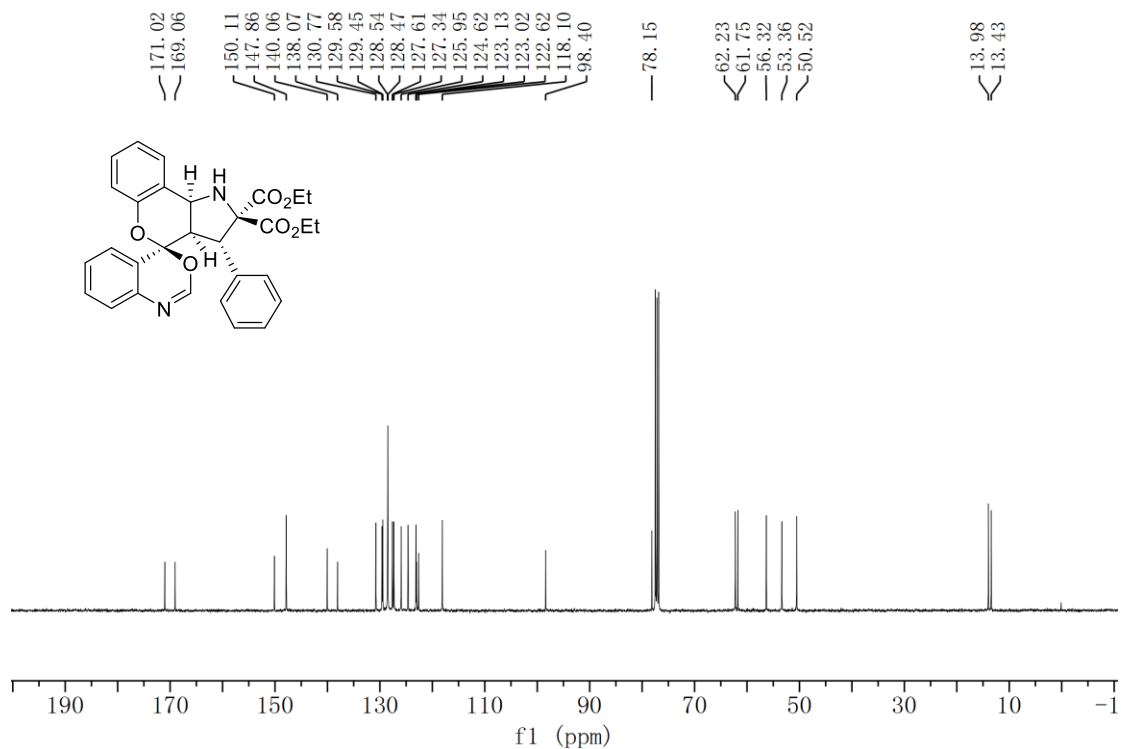



# Compound 3b

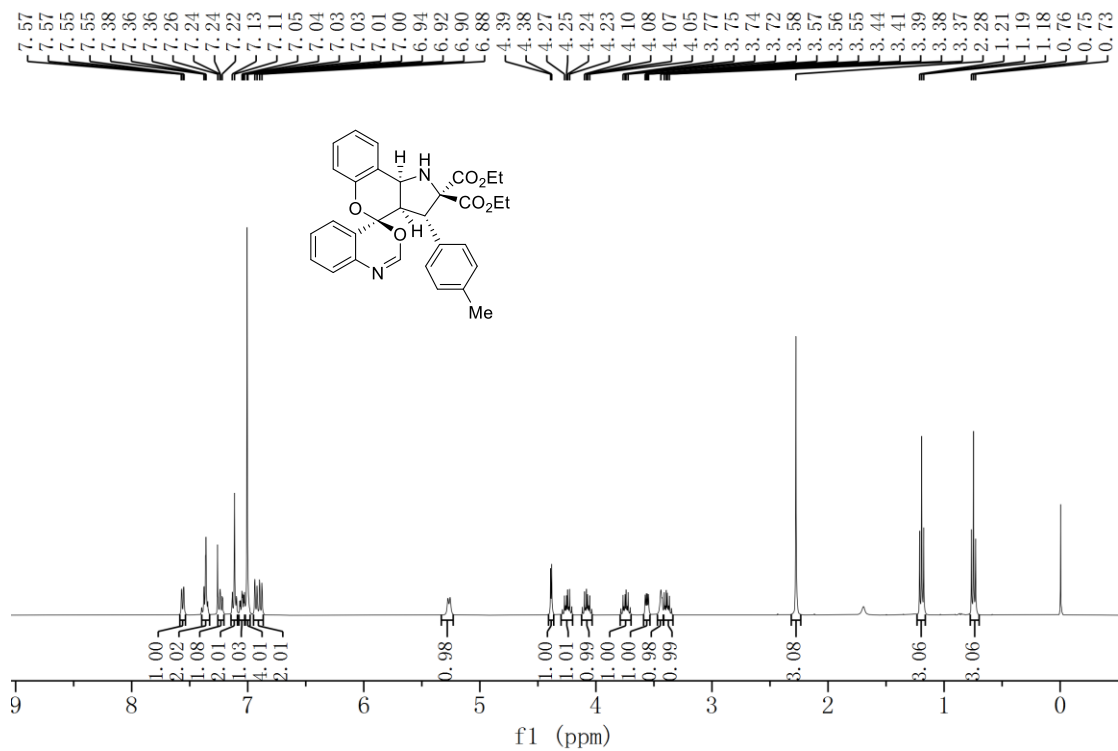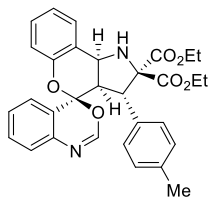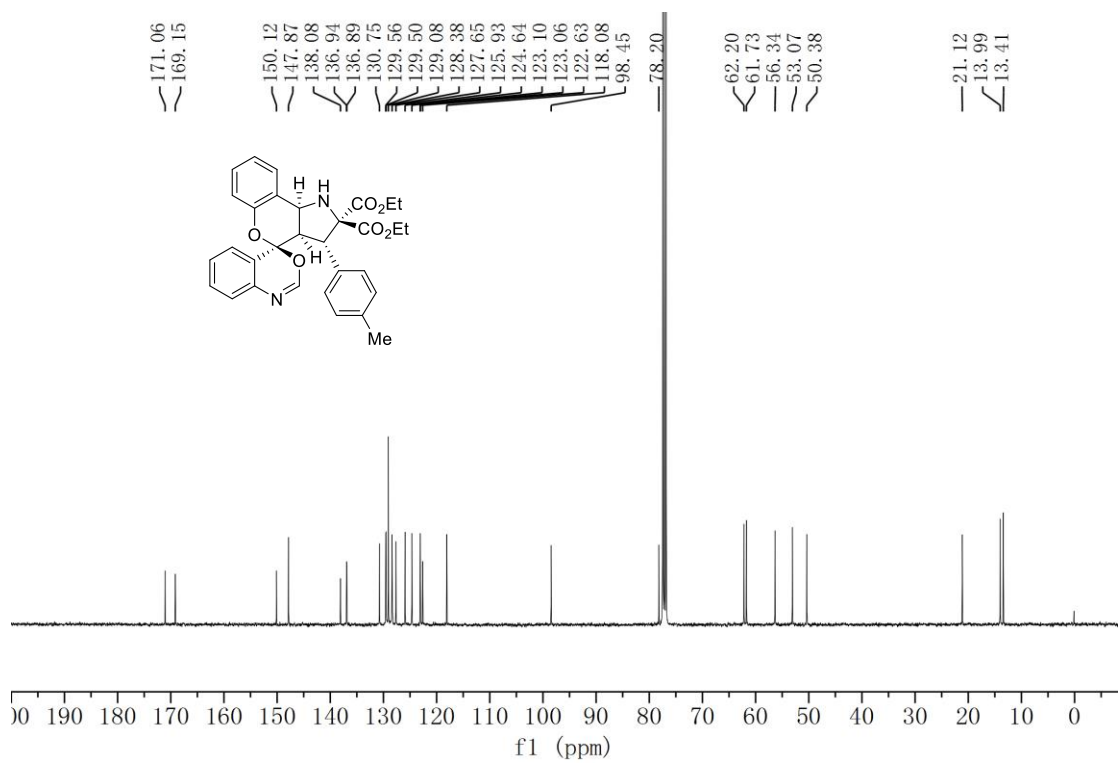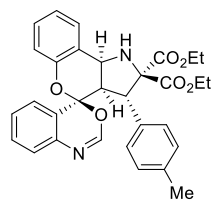

# Compound 3c

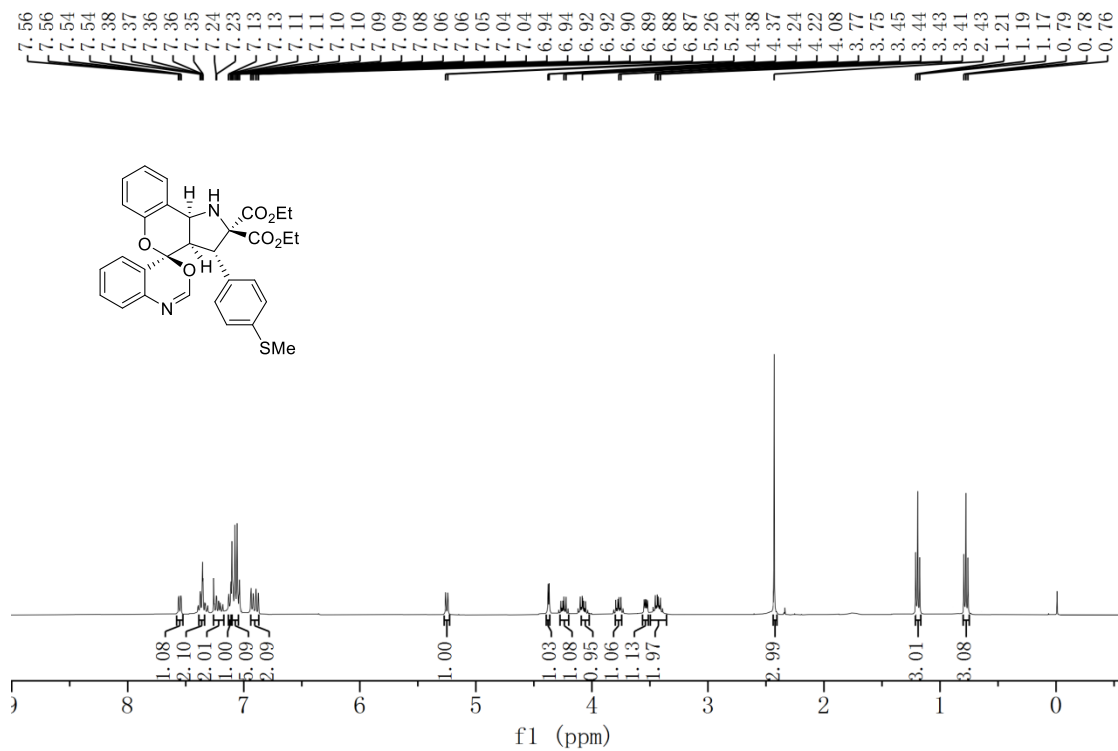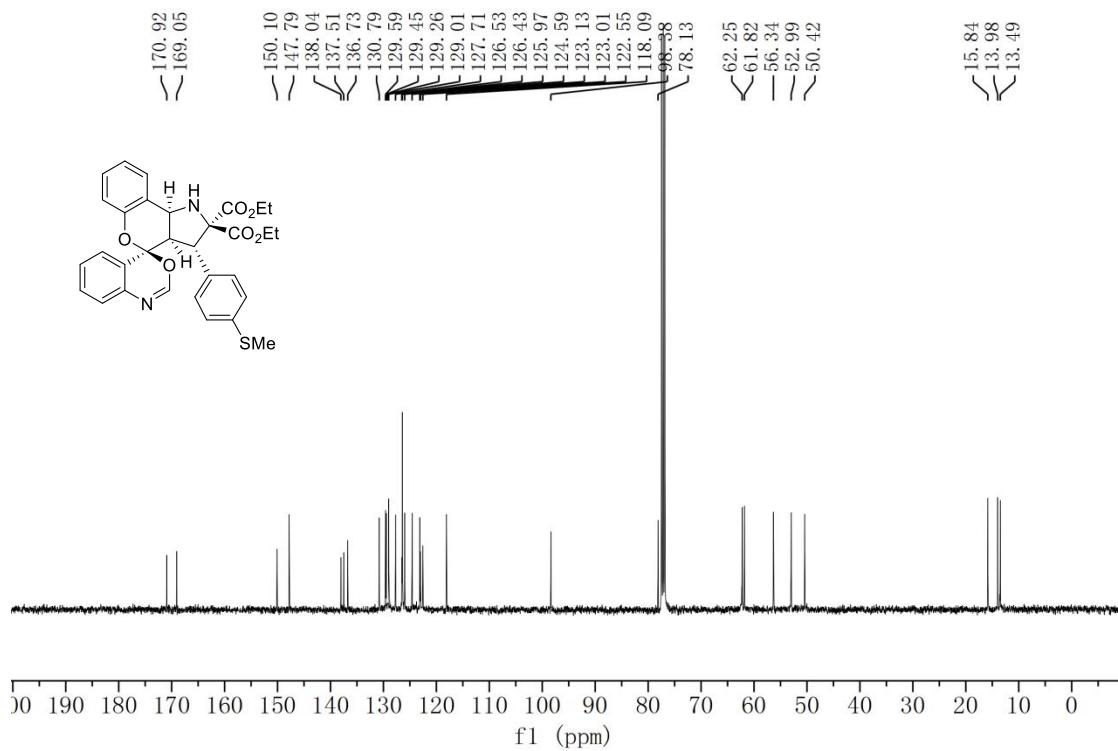

# Compound 3d

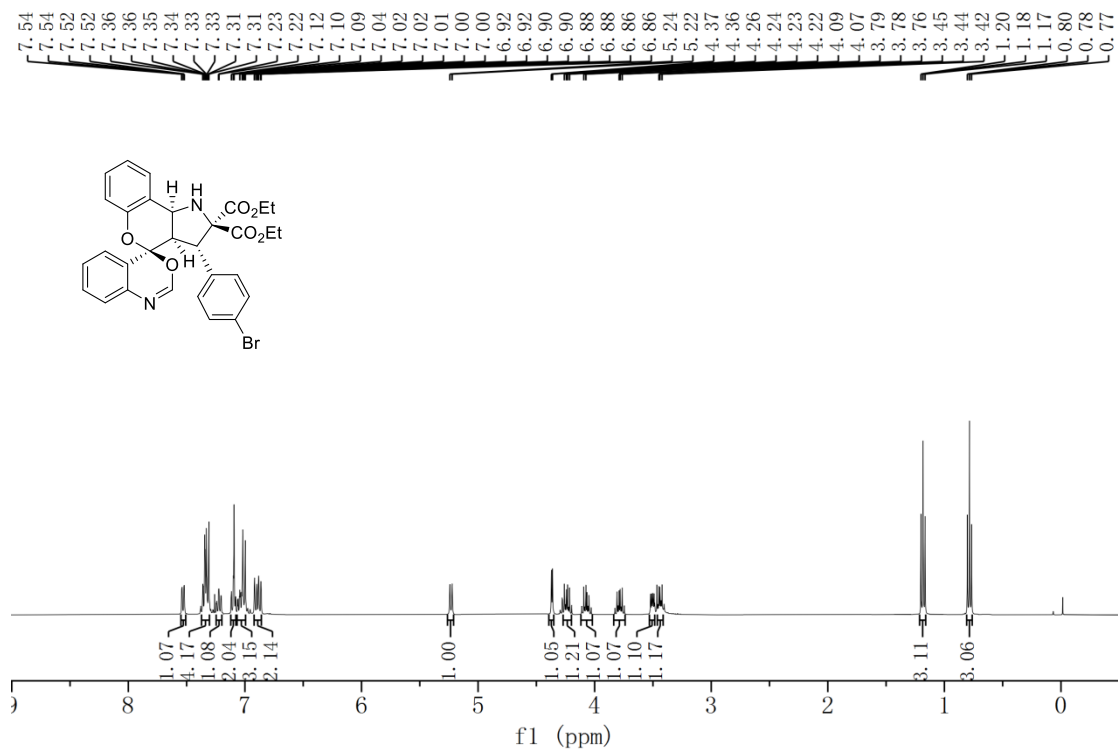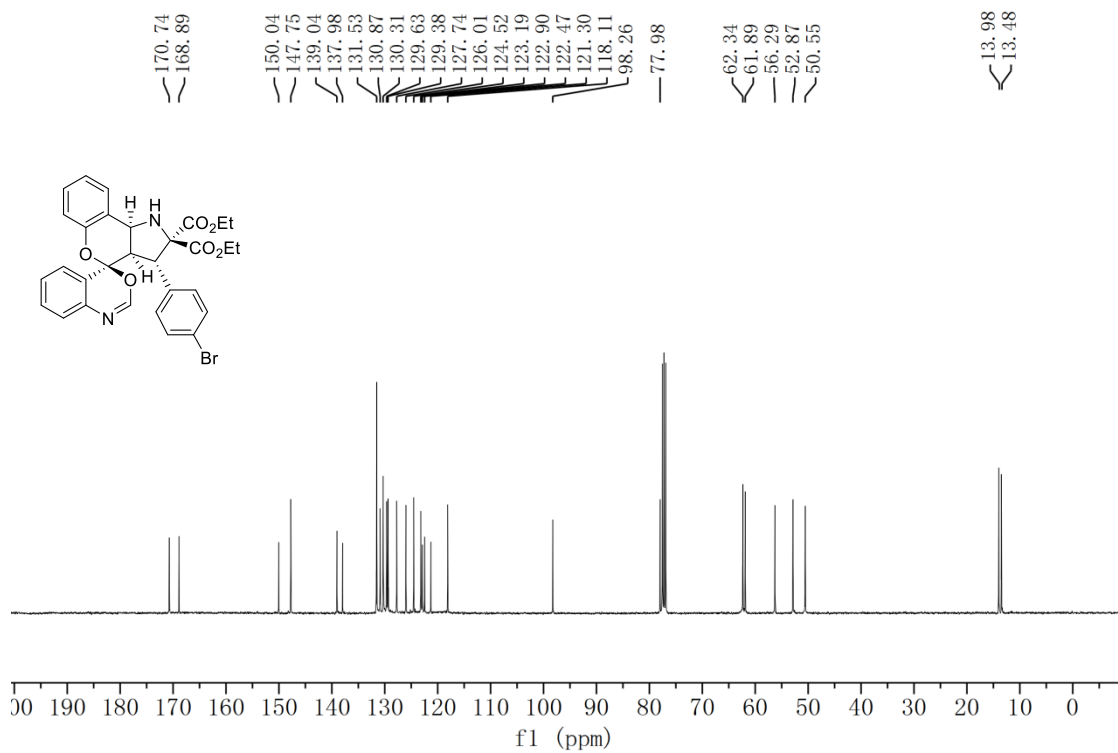

# Compound 3e

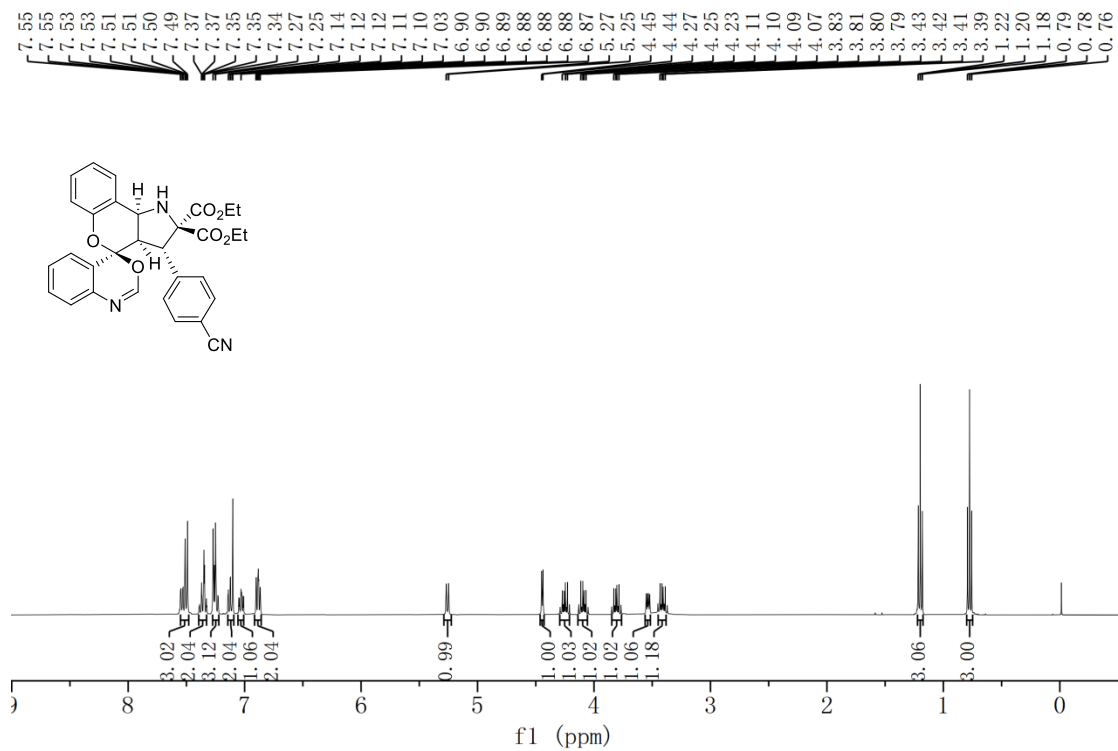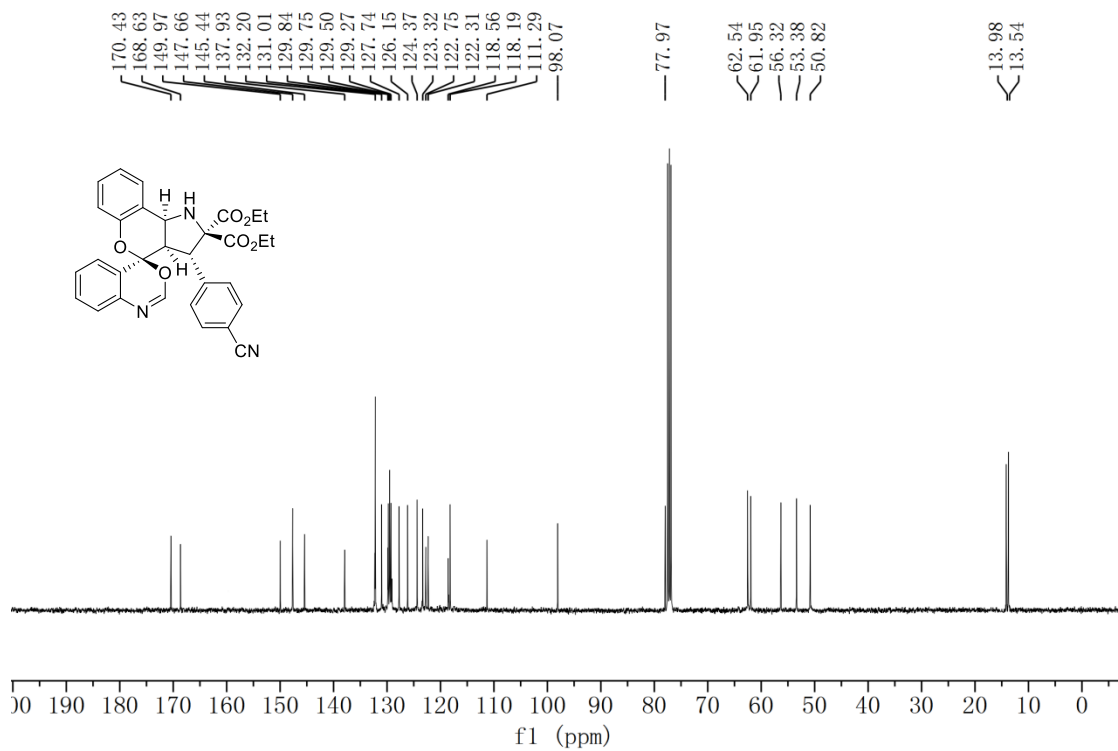

# Compound 3f

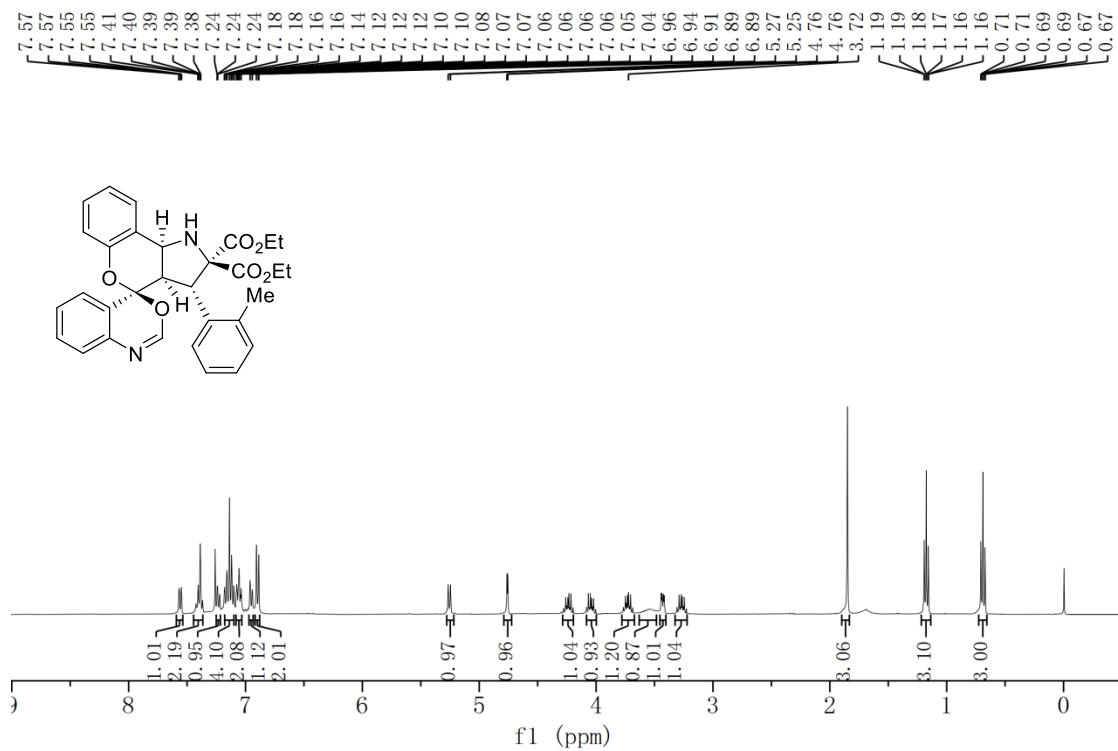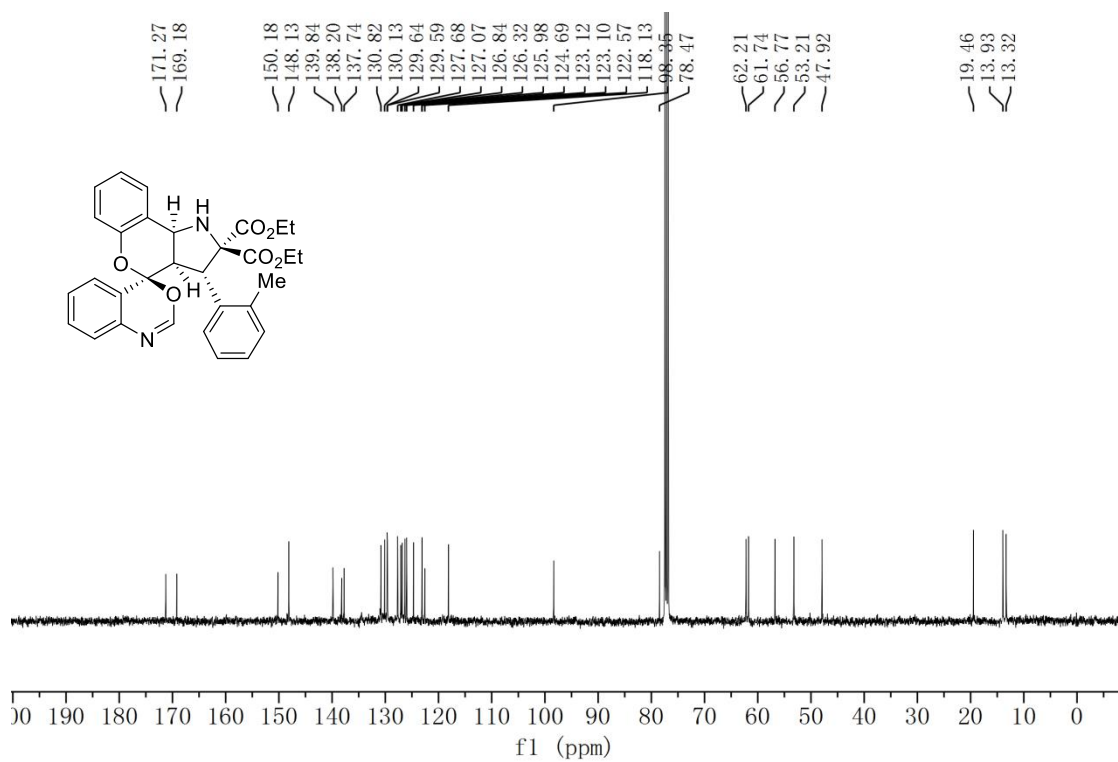

# Compound 3g

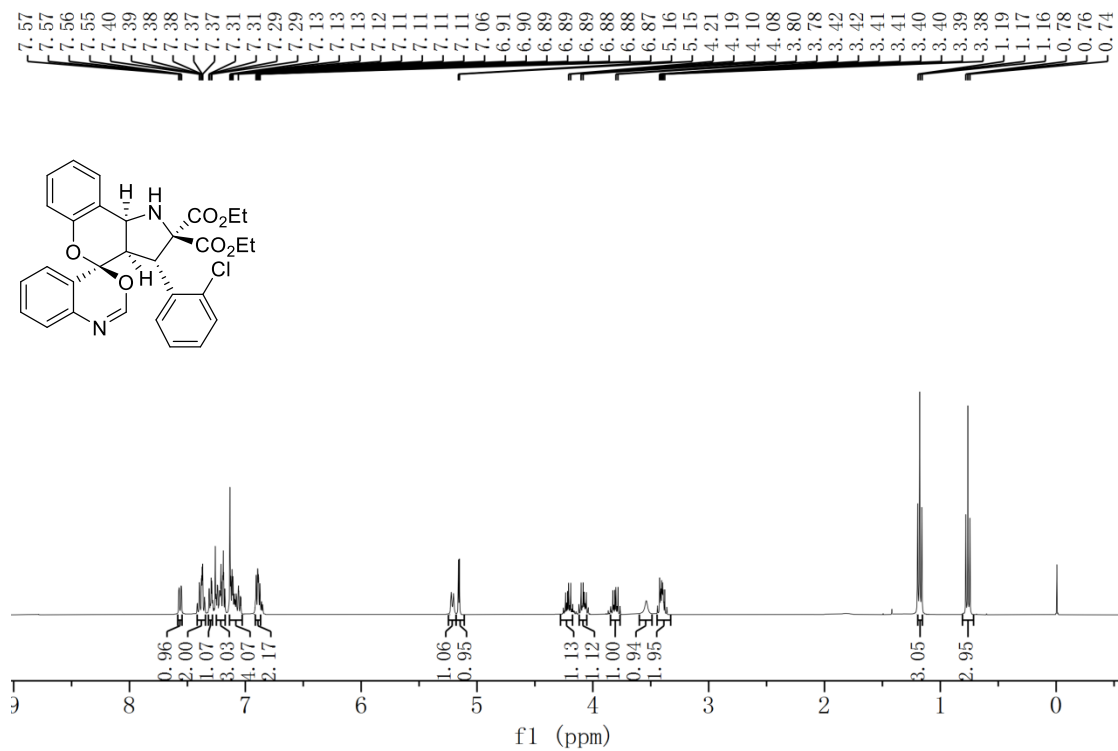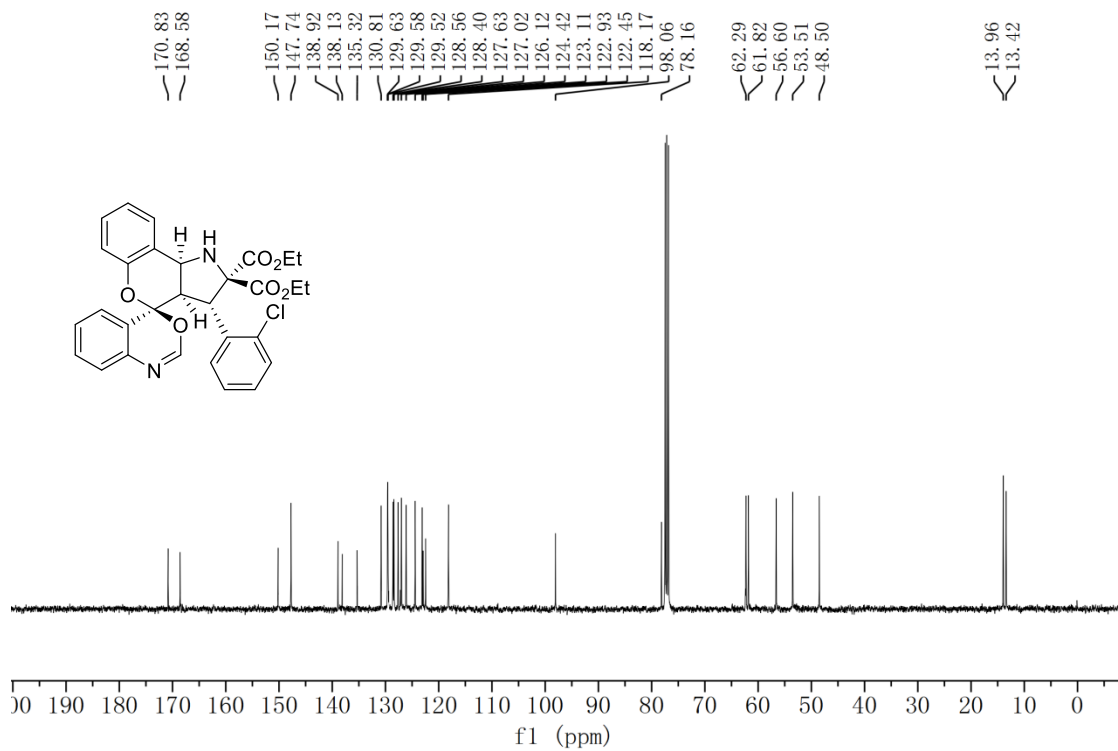



# Compound 3i

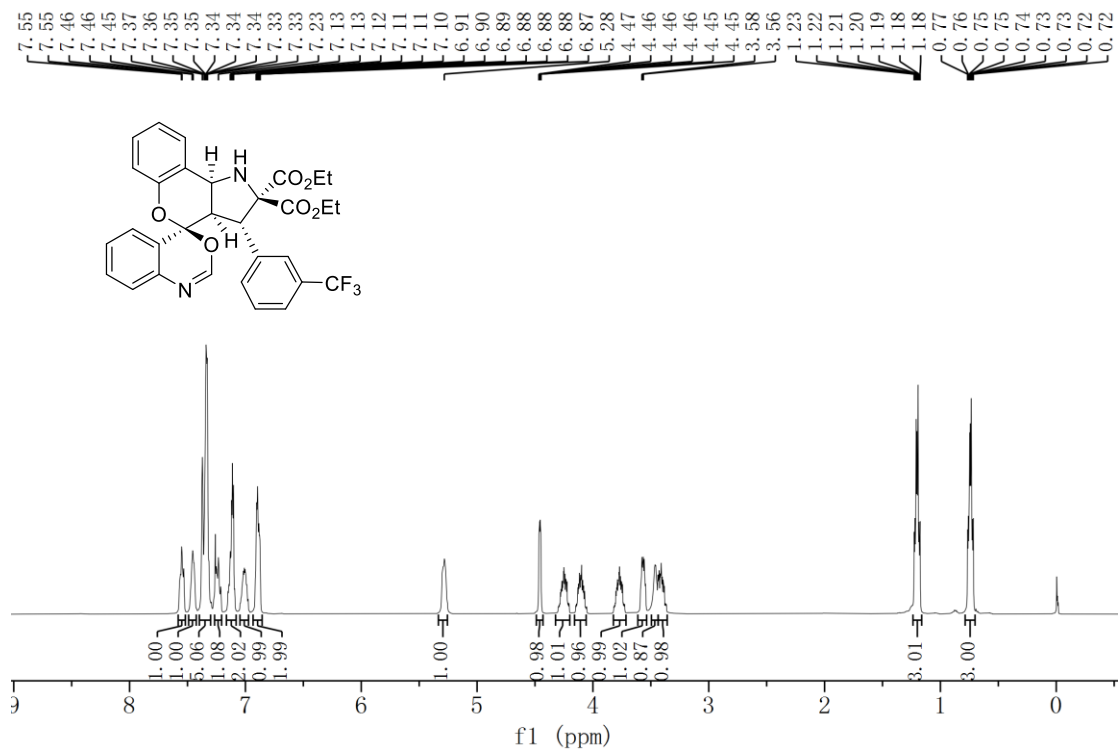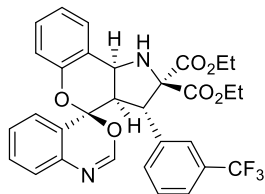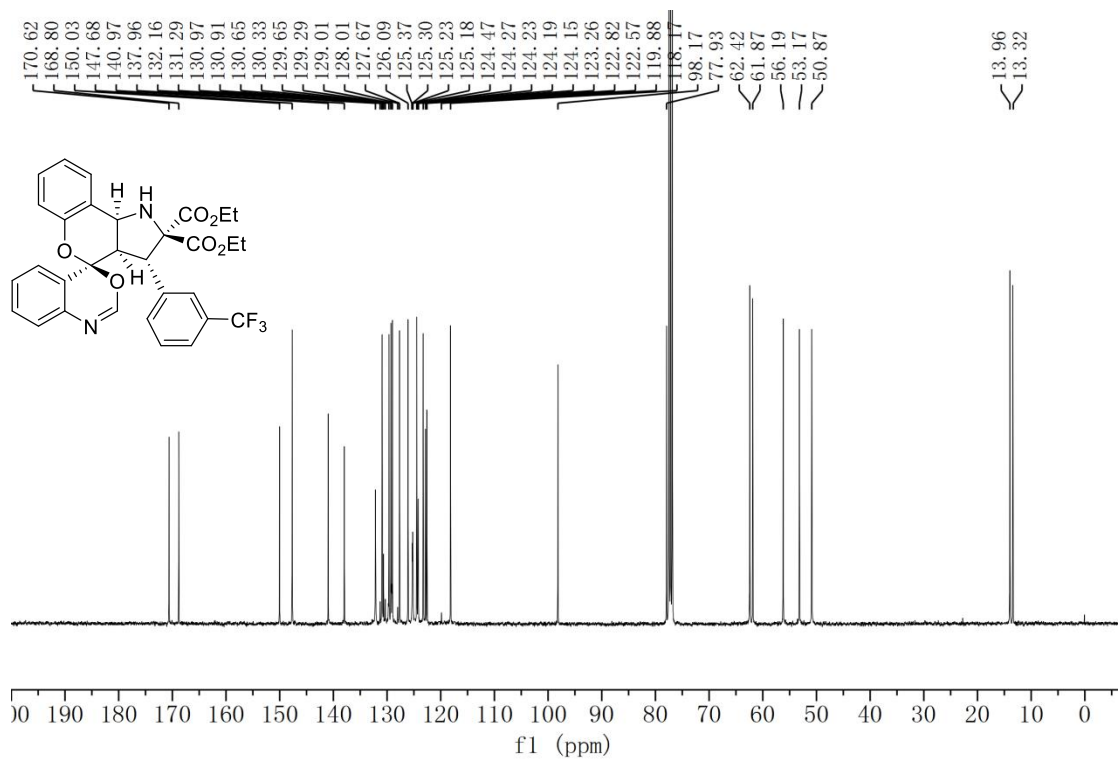



# Compound 3j

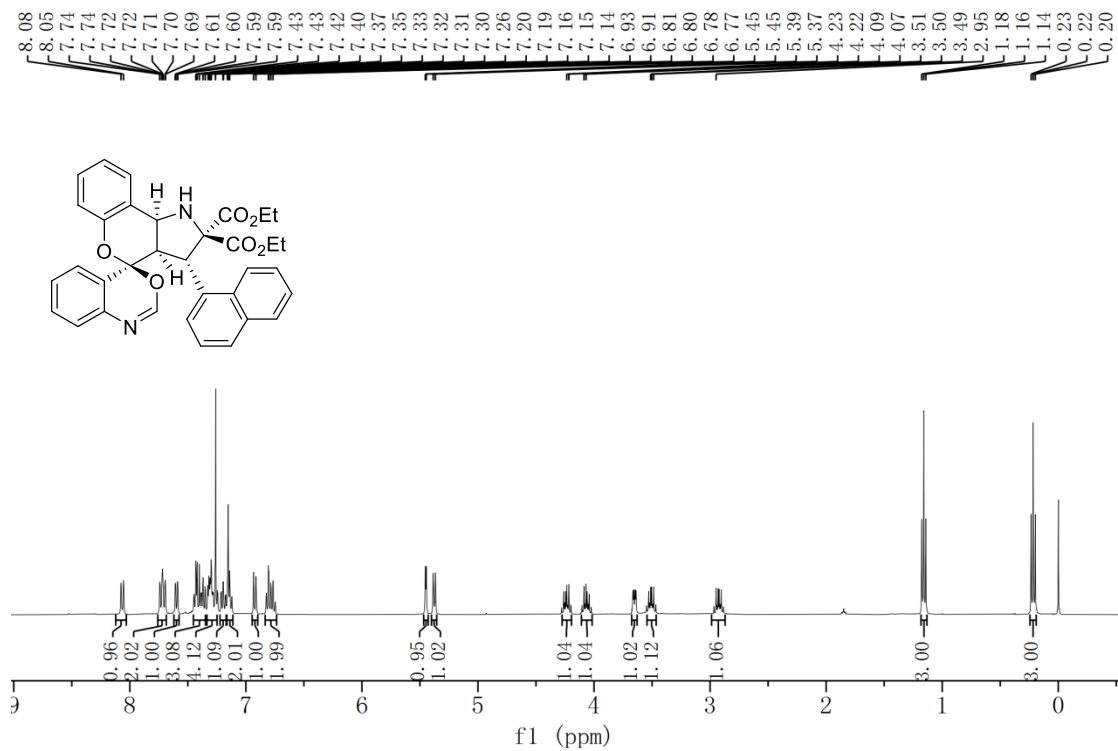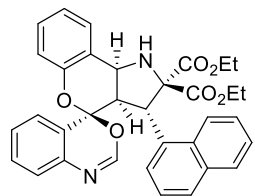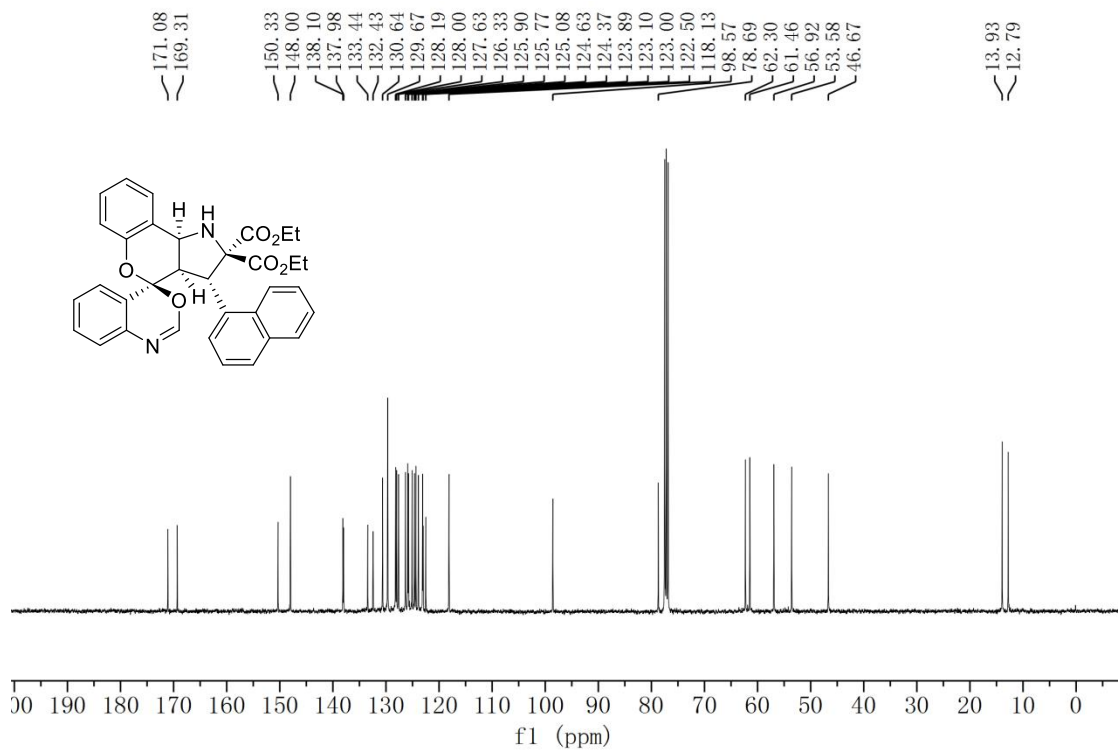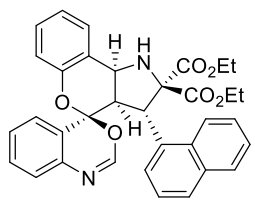

# Compound 3k

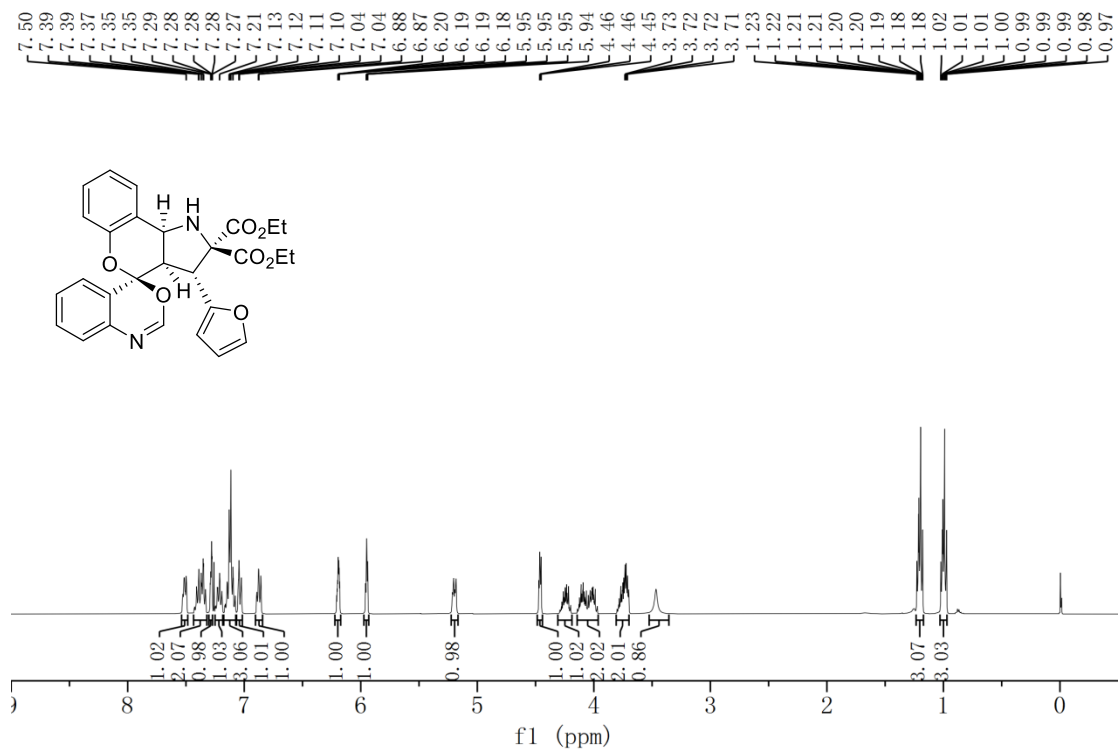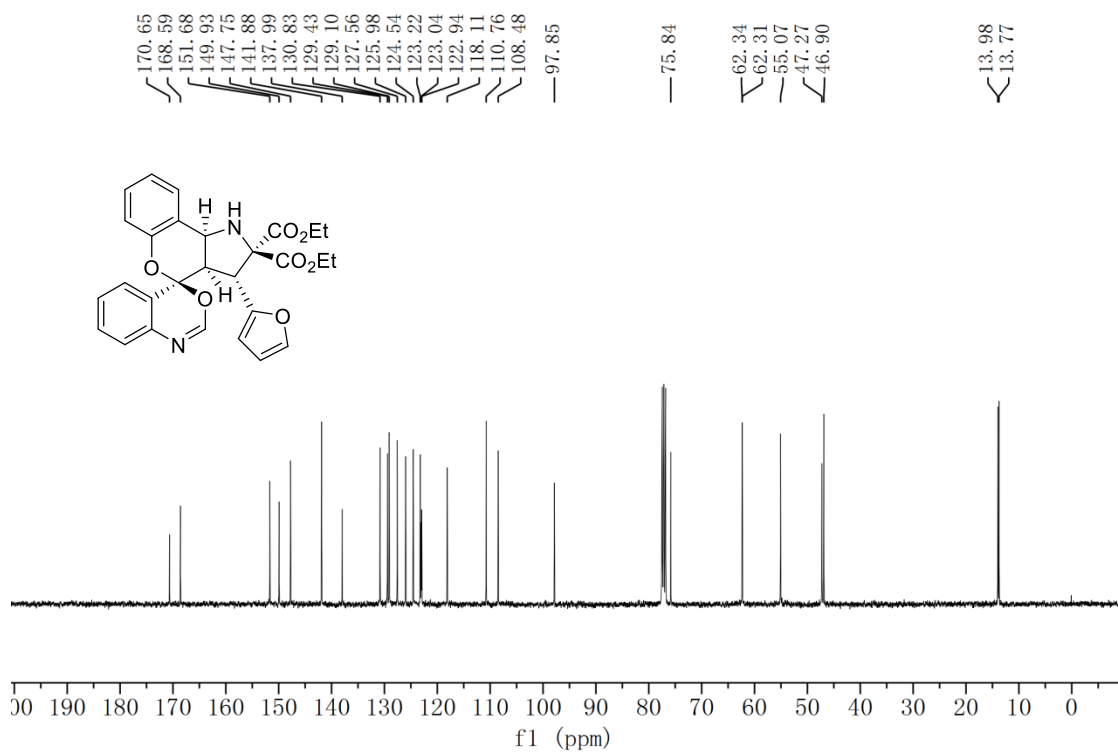

# Compound 31

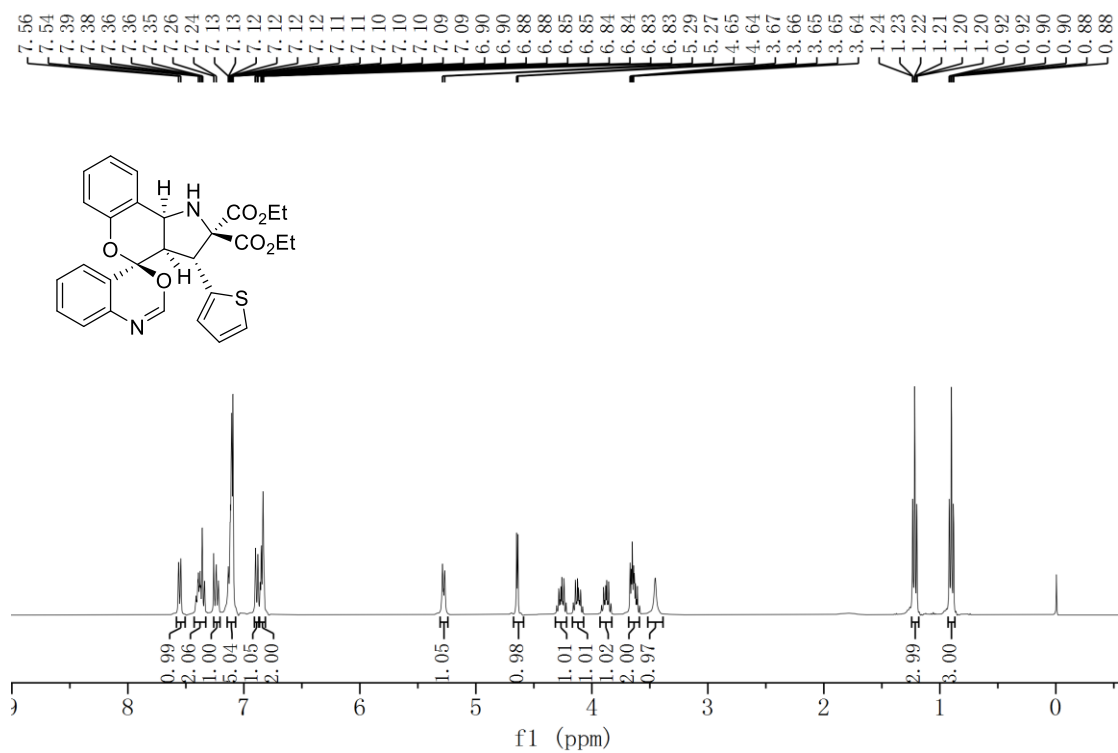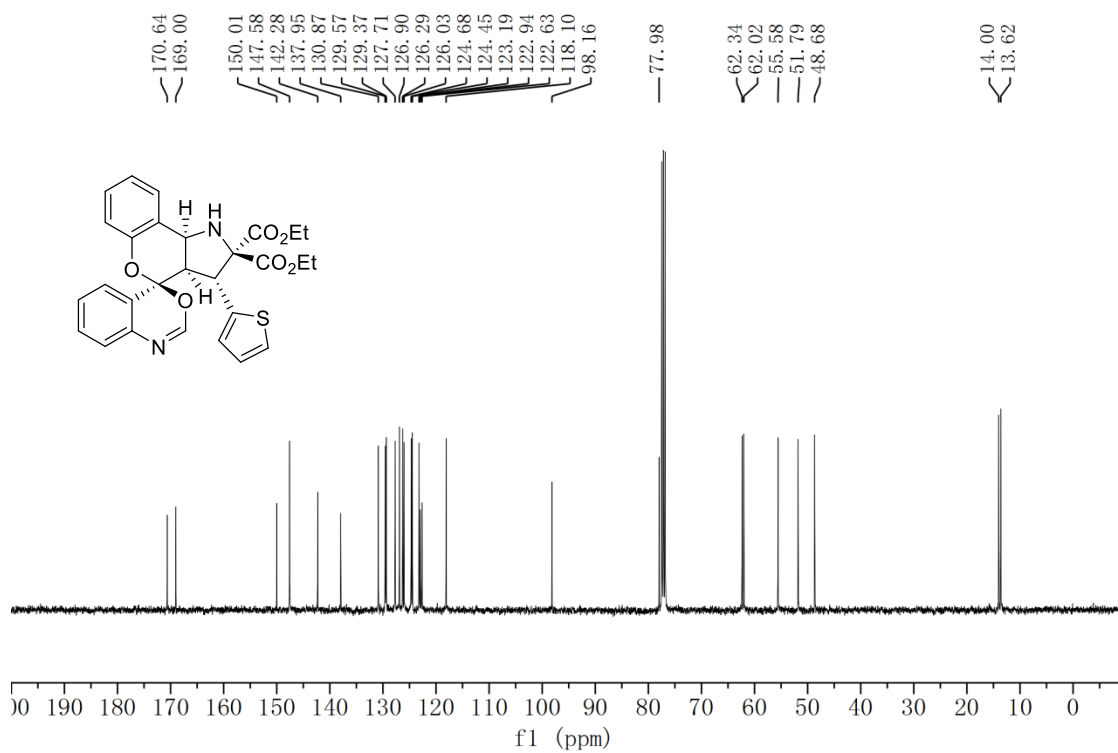

# Compound 3m

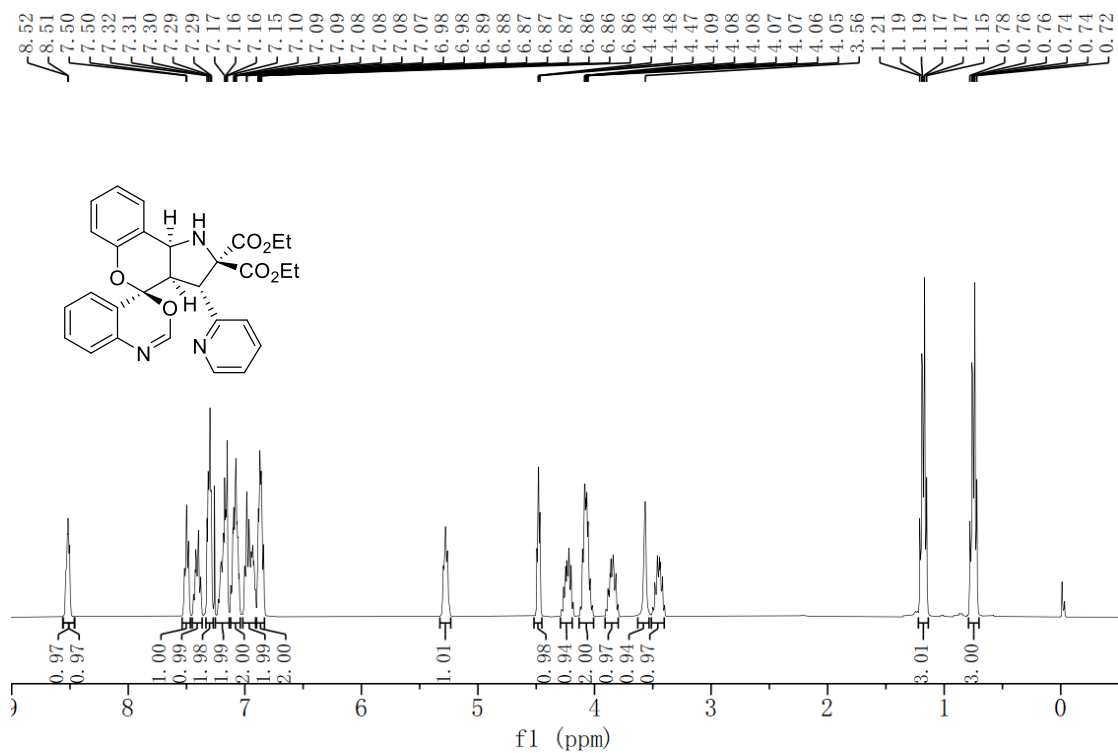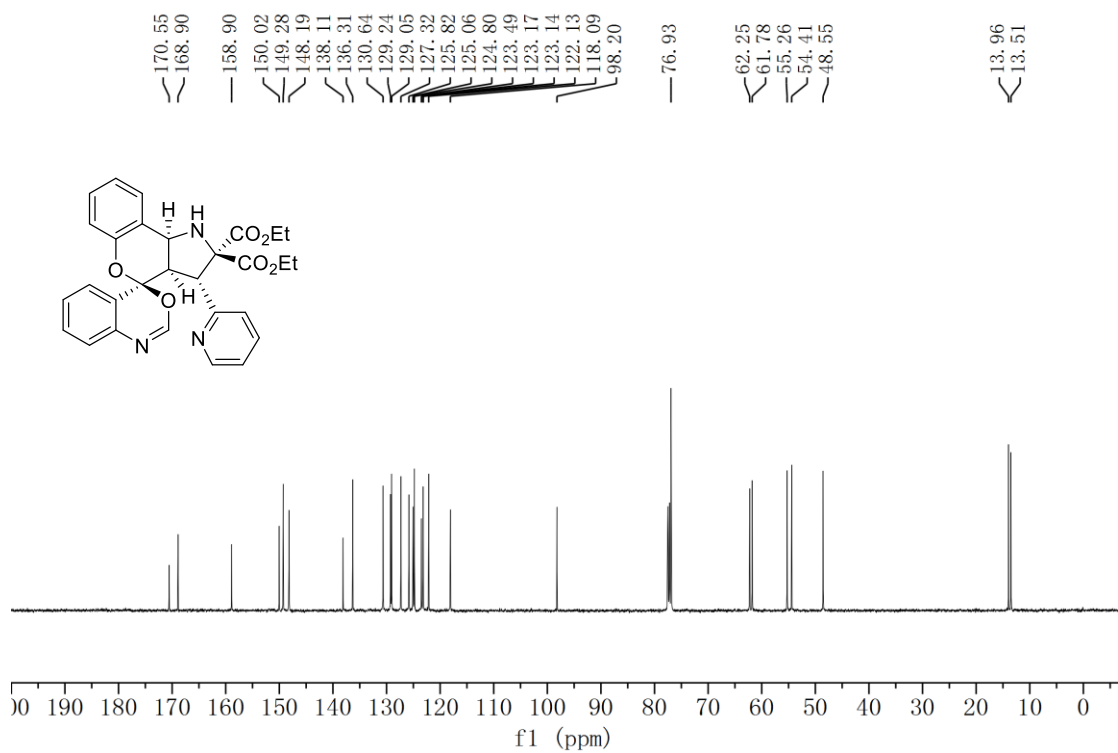

# Compound 3n

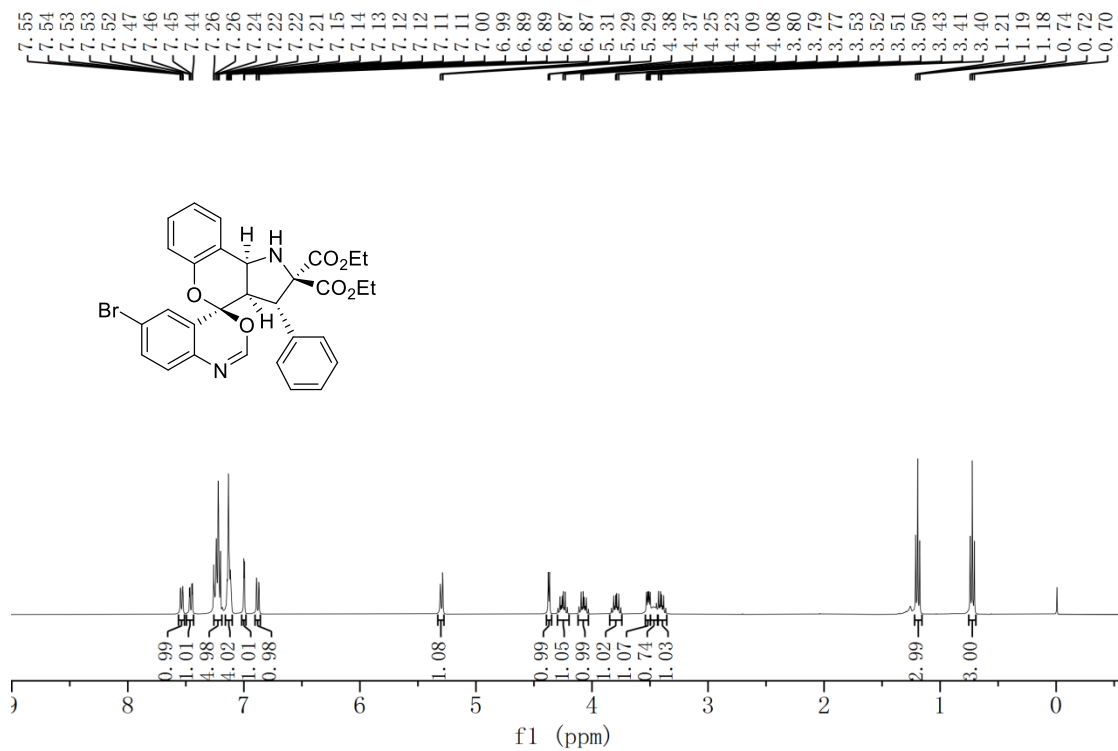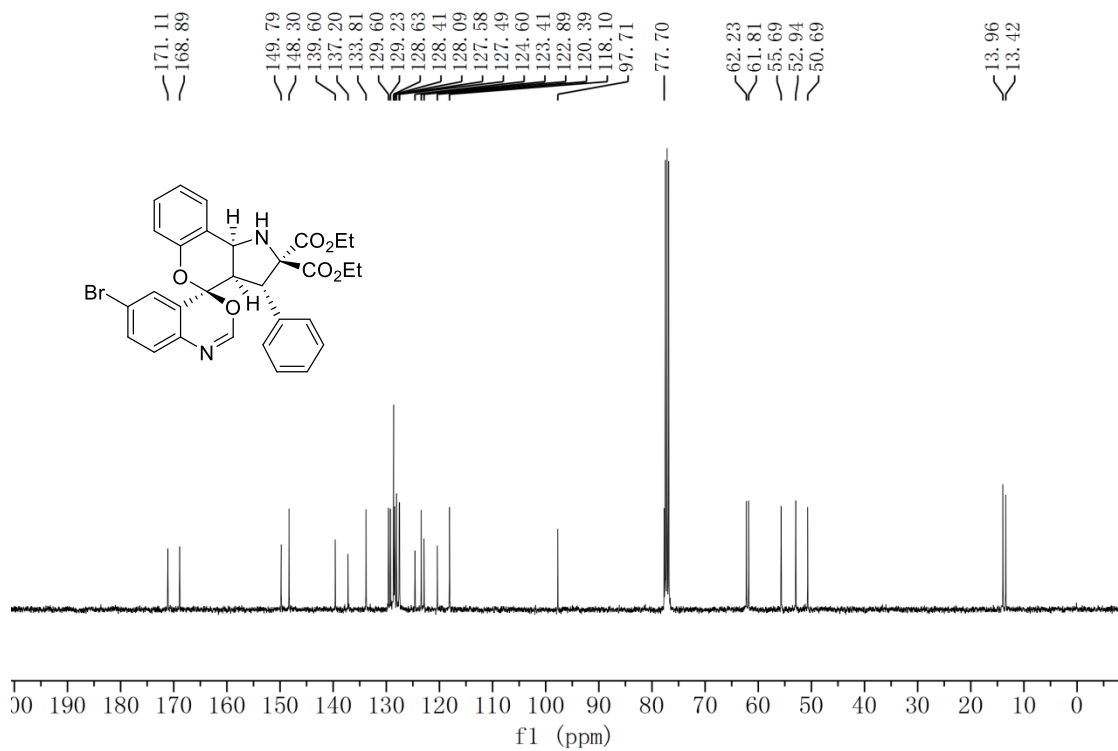

# Compound 3o

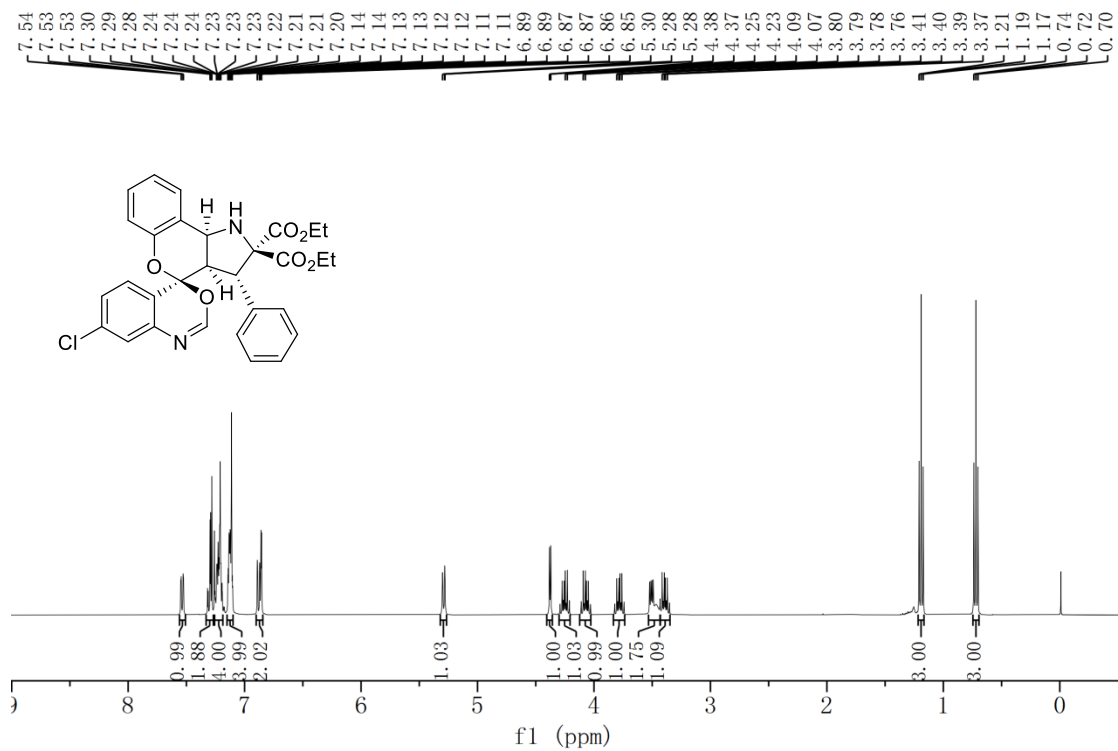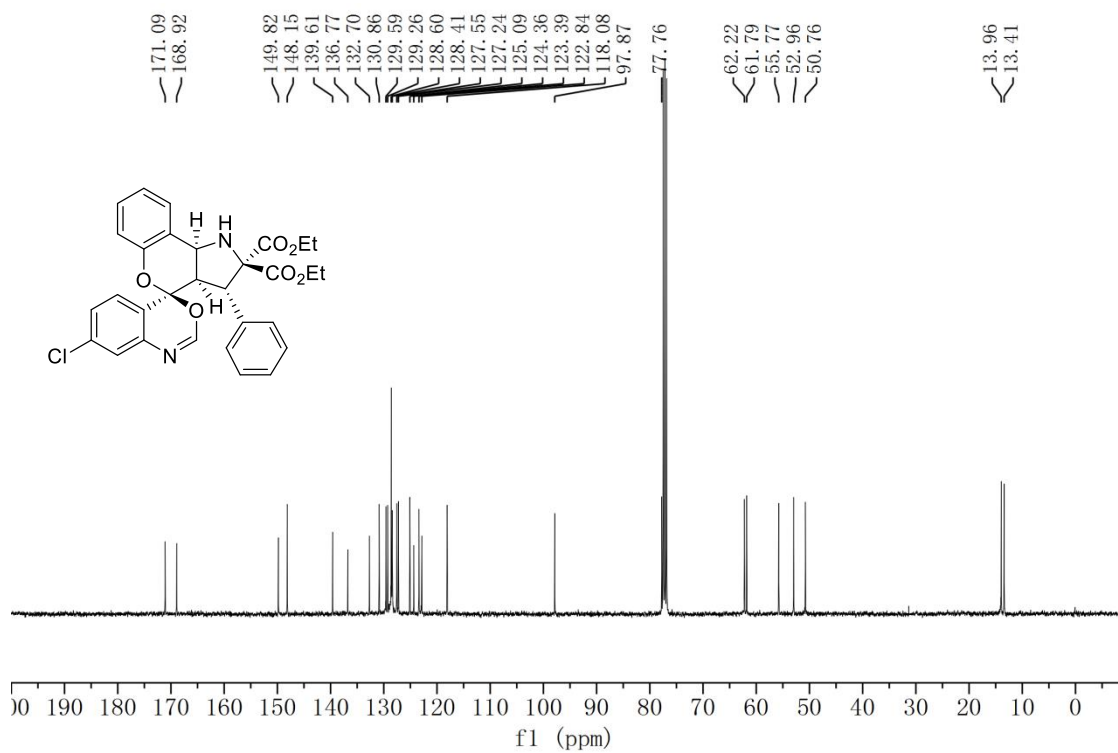

# Compound 4a

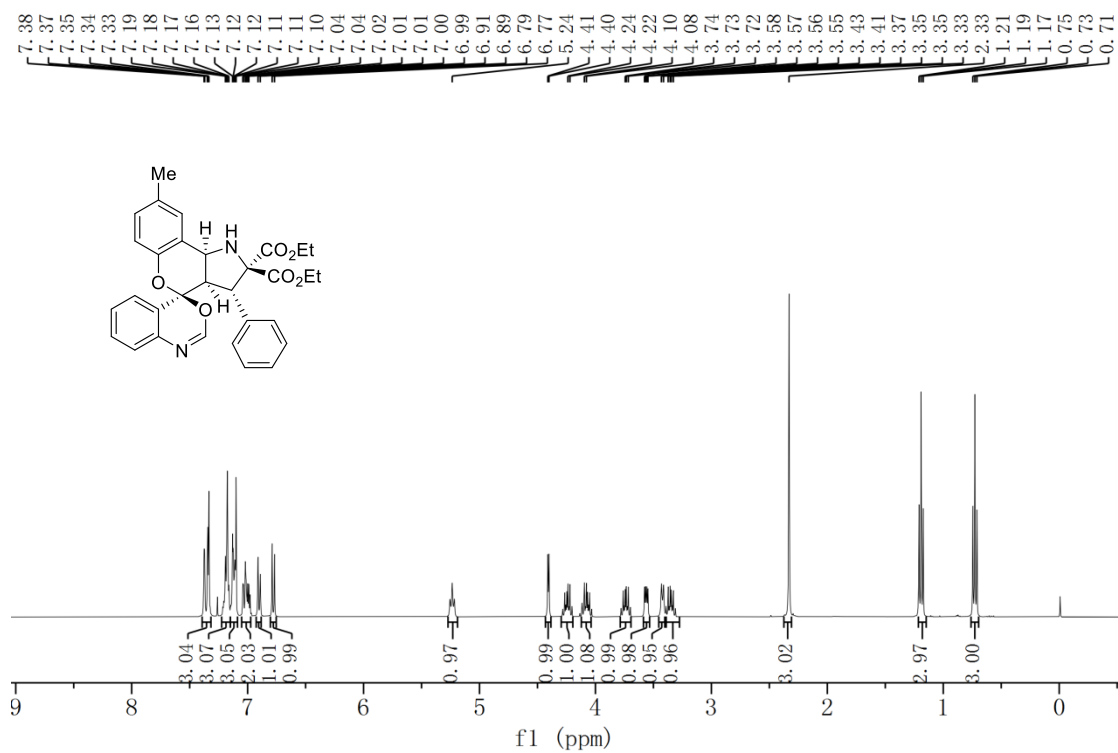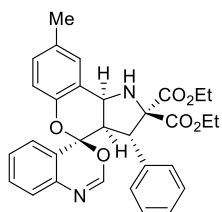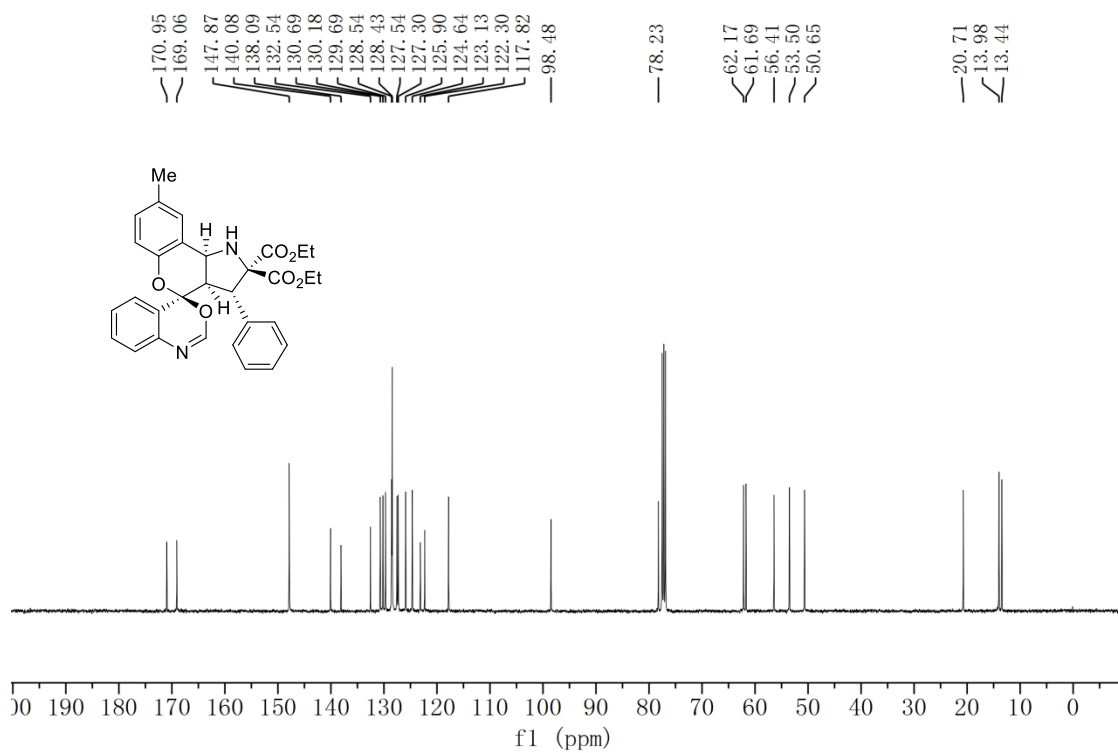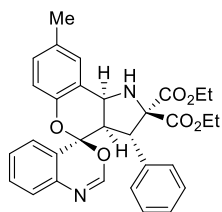

# Compound 4b

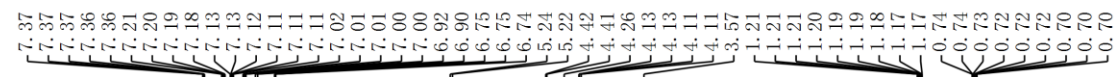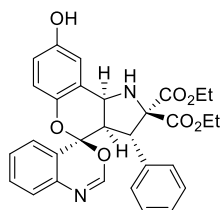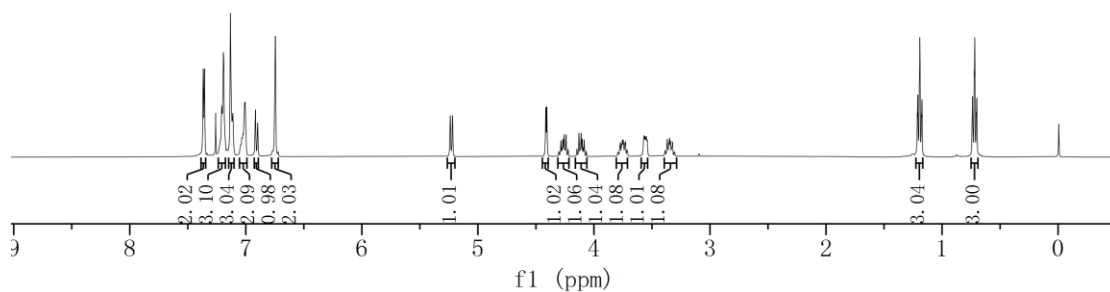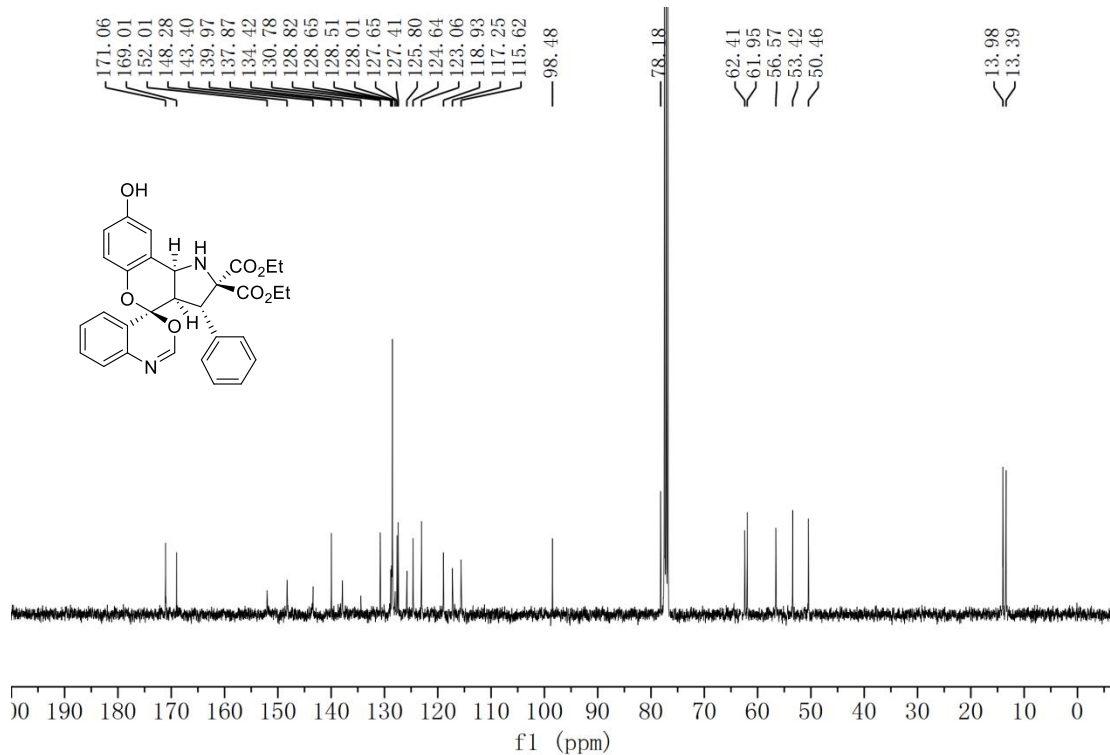



# Compound 4c

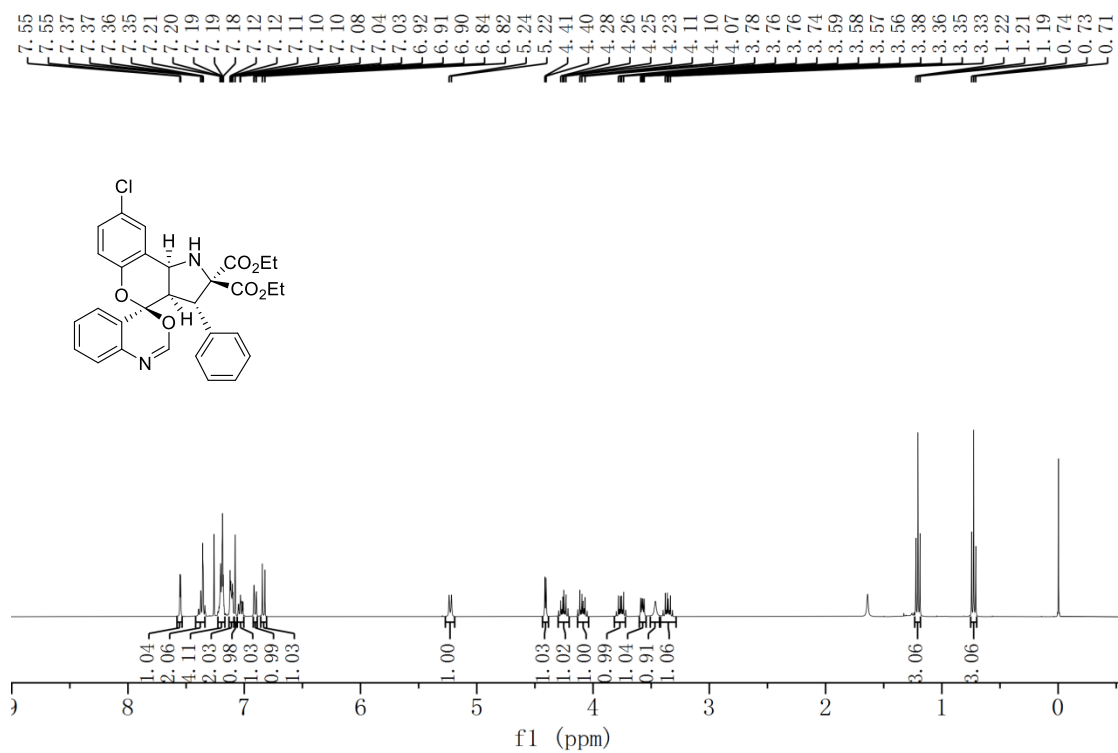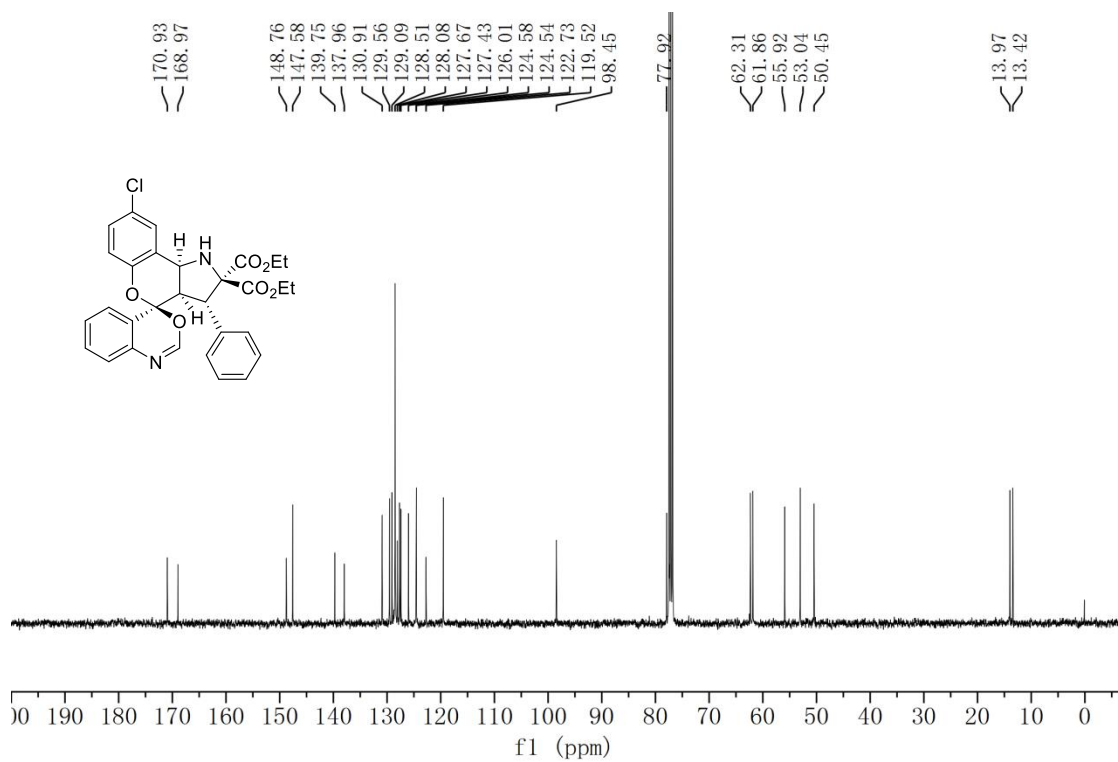

# Compound 4d

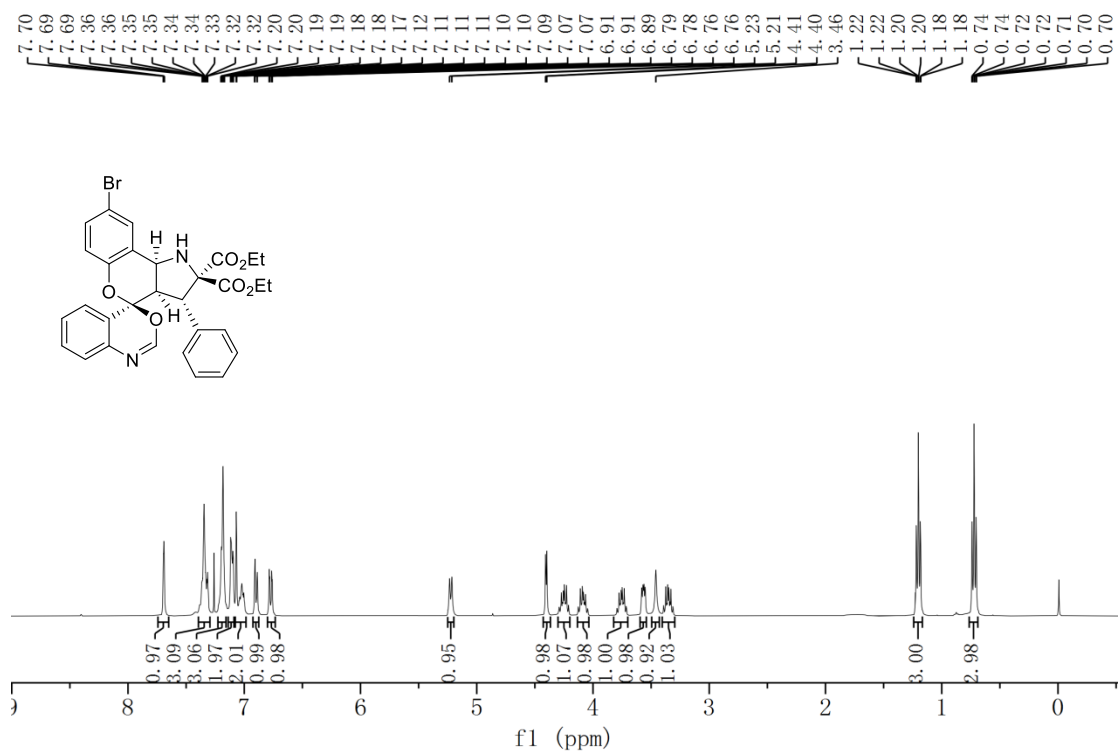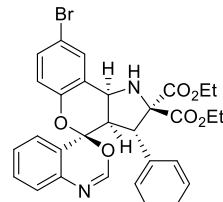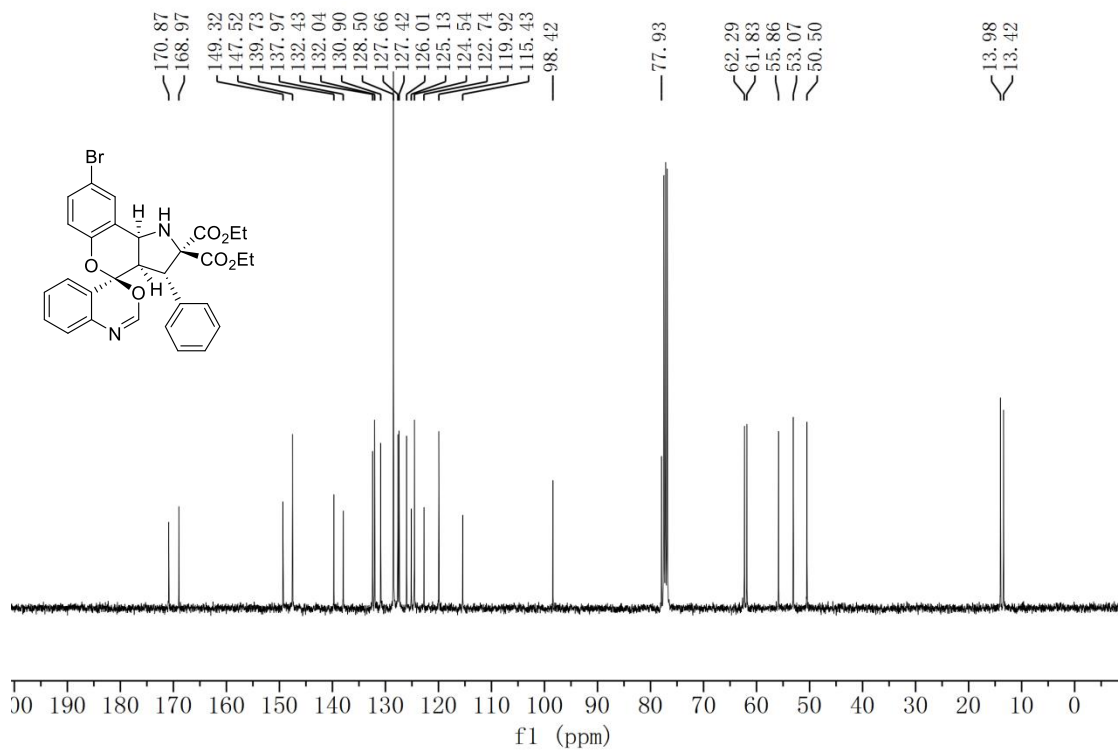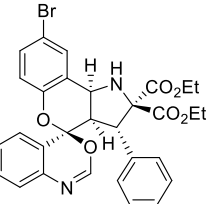

# Compound 4e

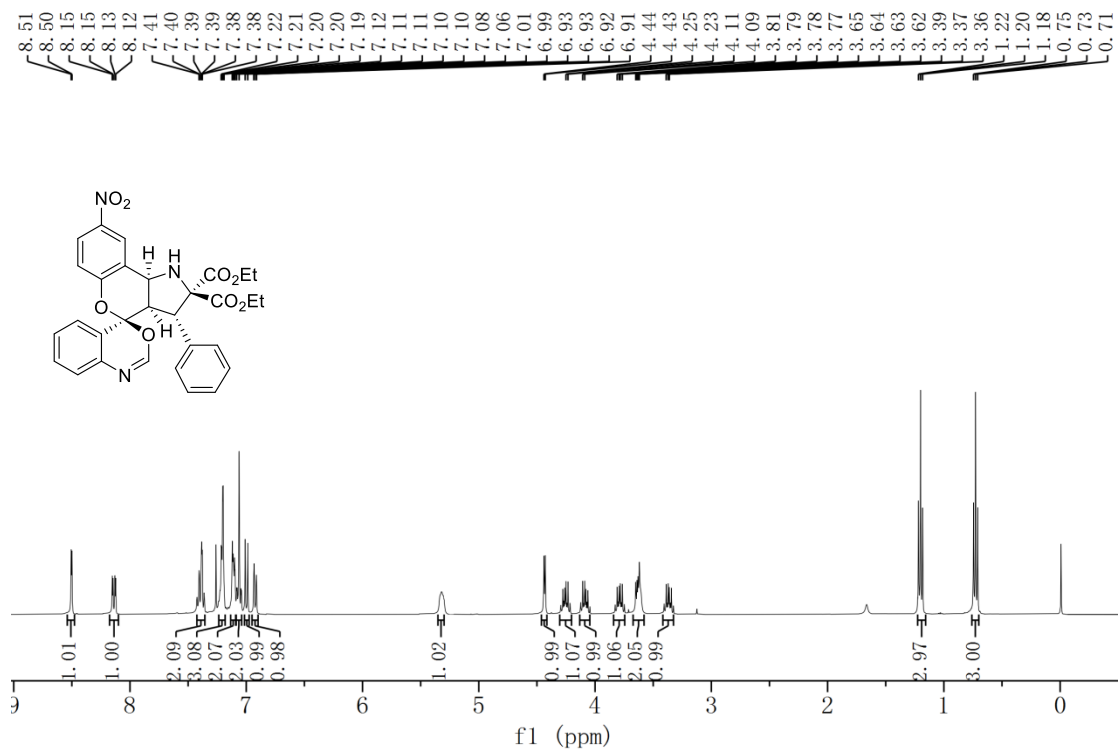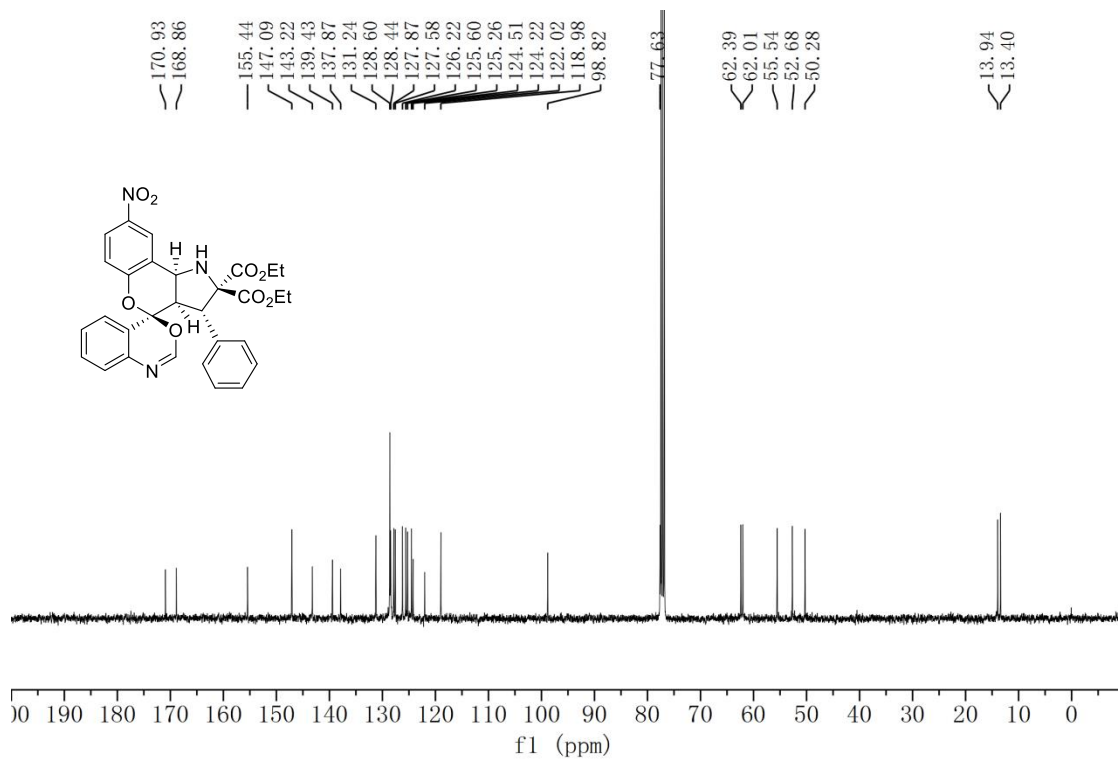

# Compound 4f

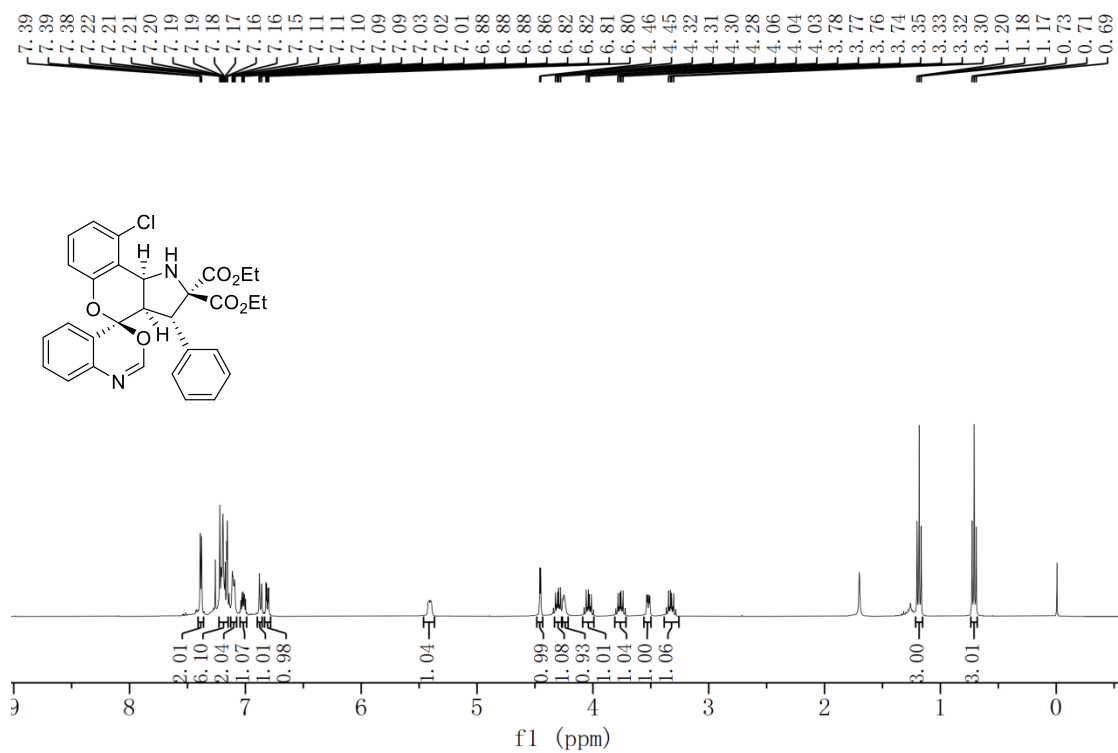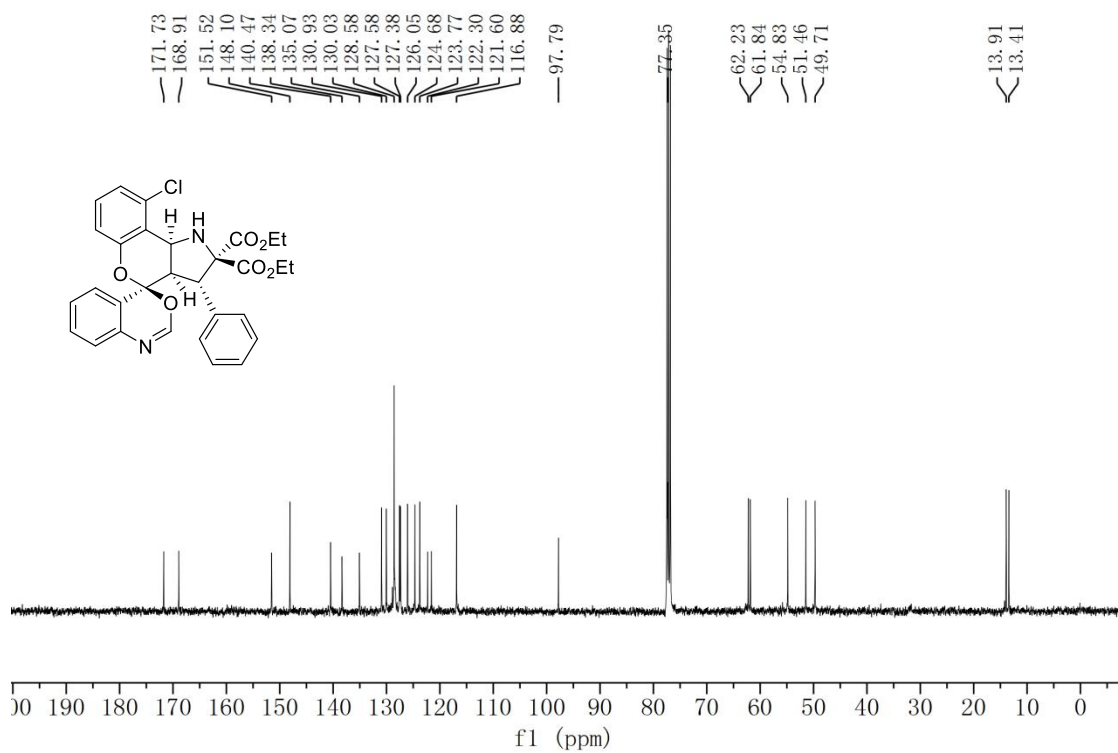

# Compound 4g

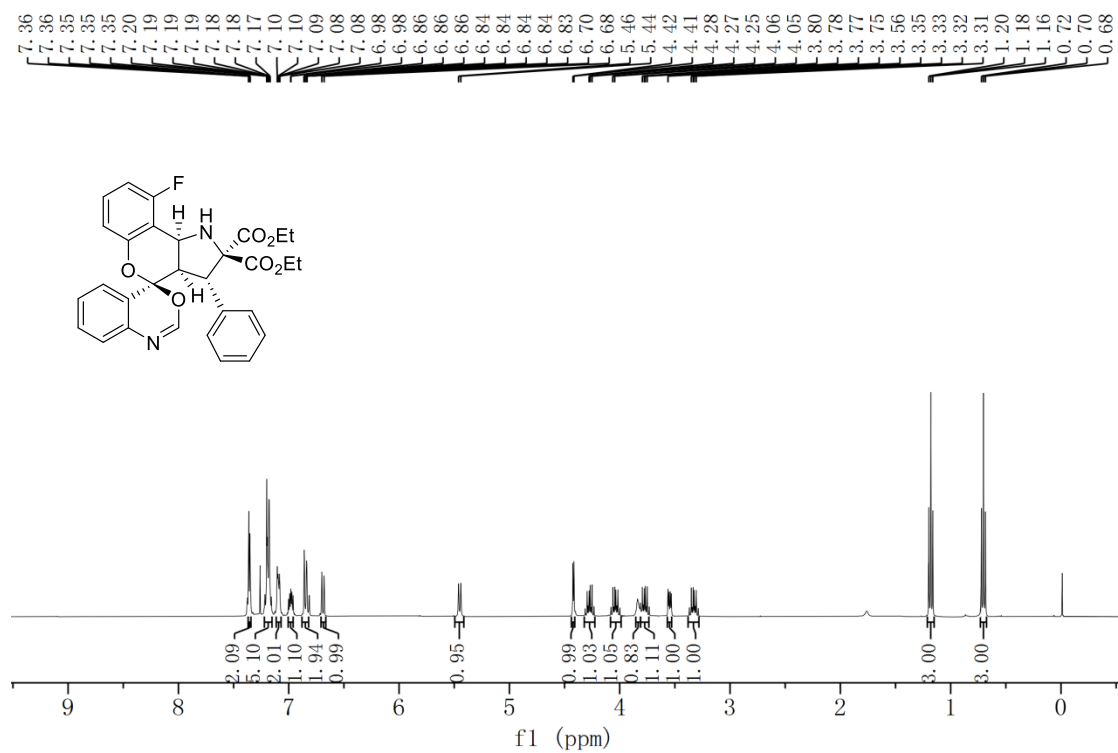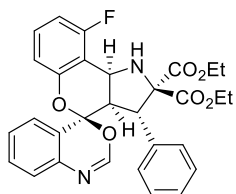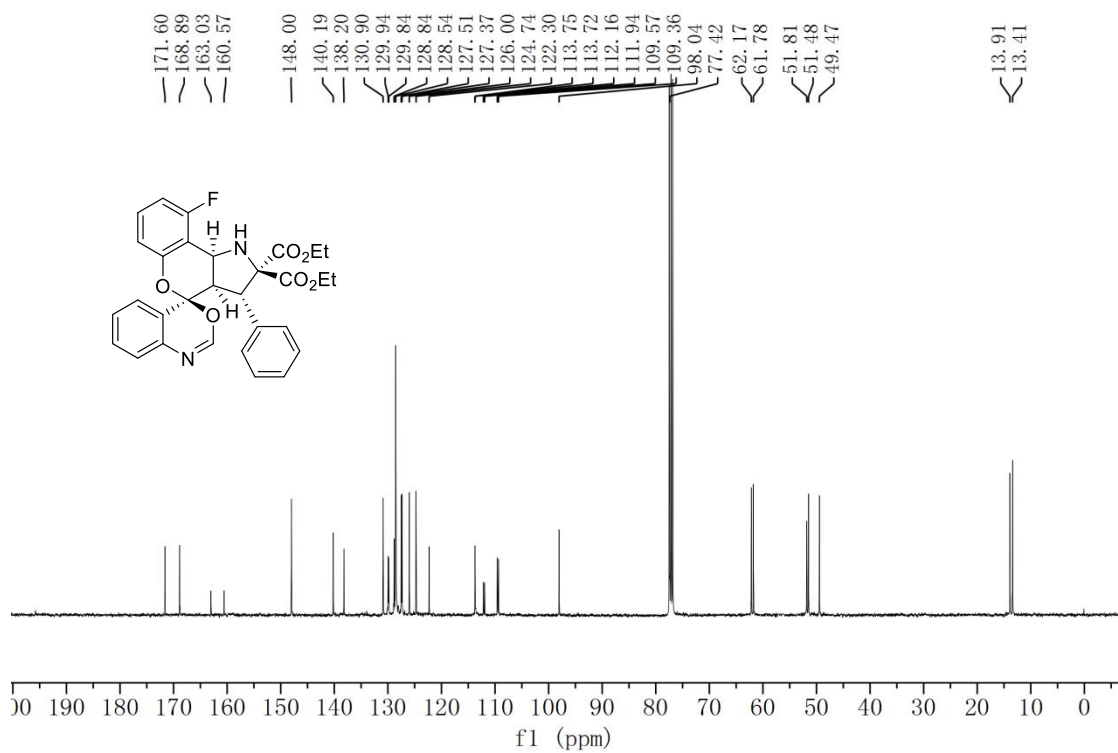

# Compound 4h

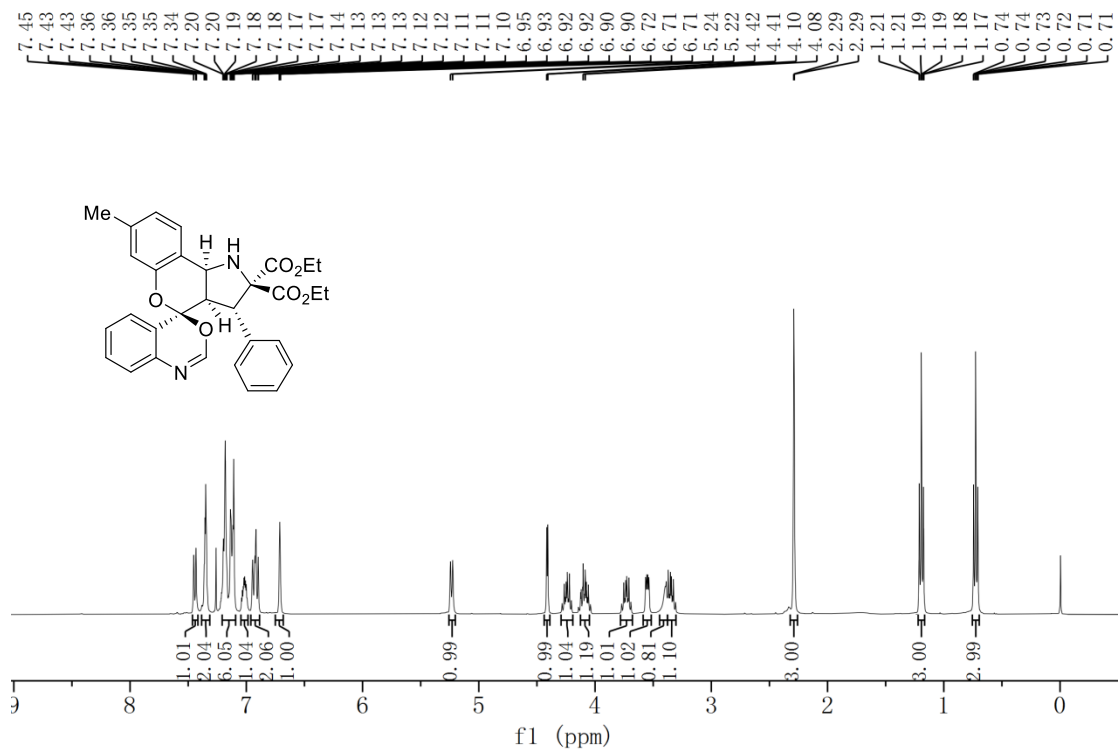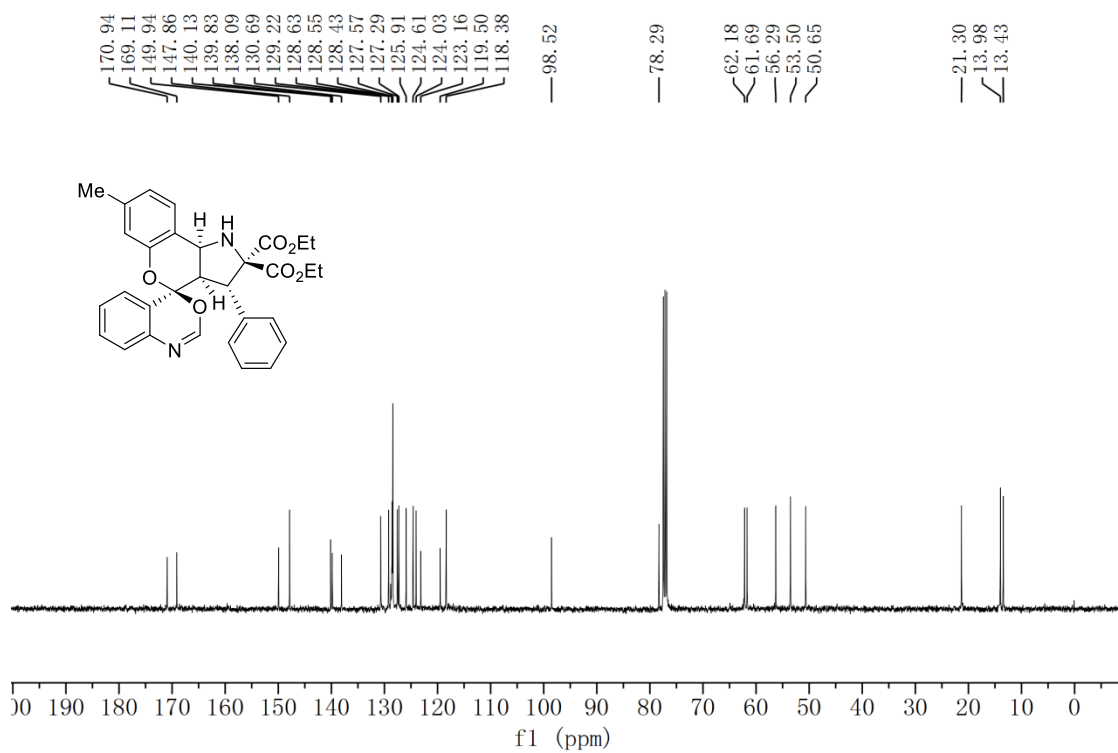

# Compound 4i

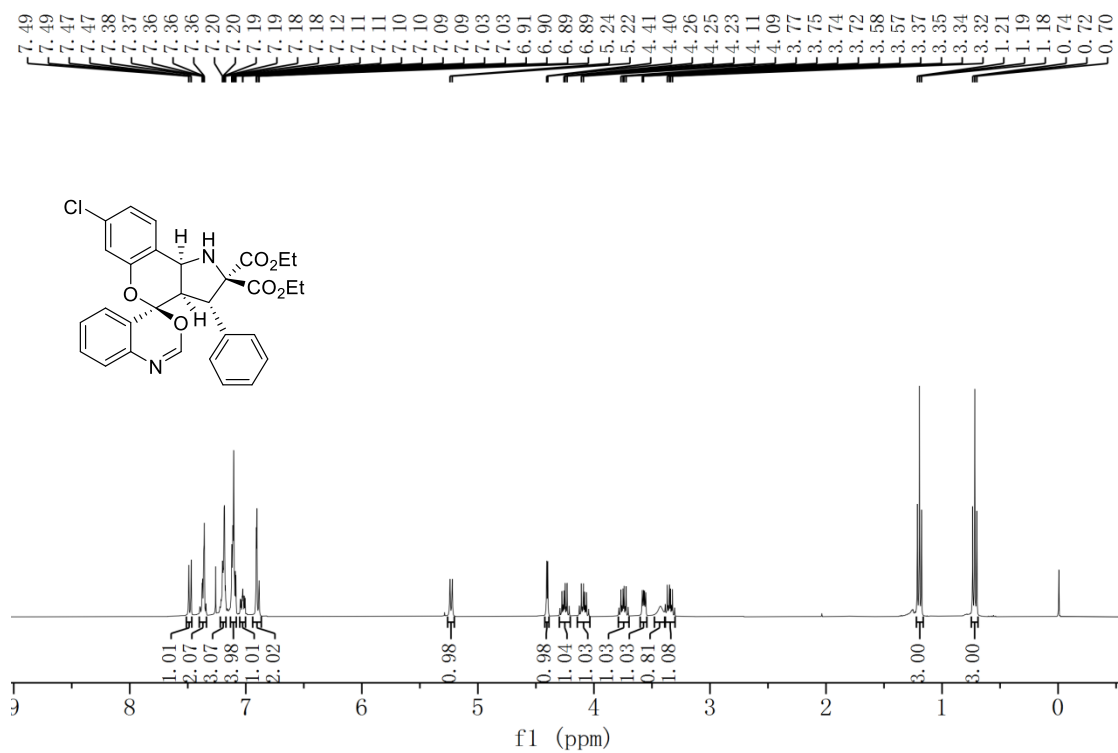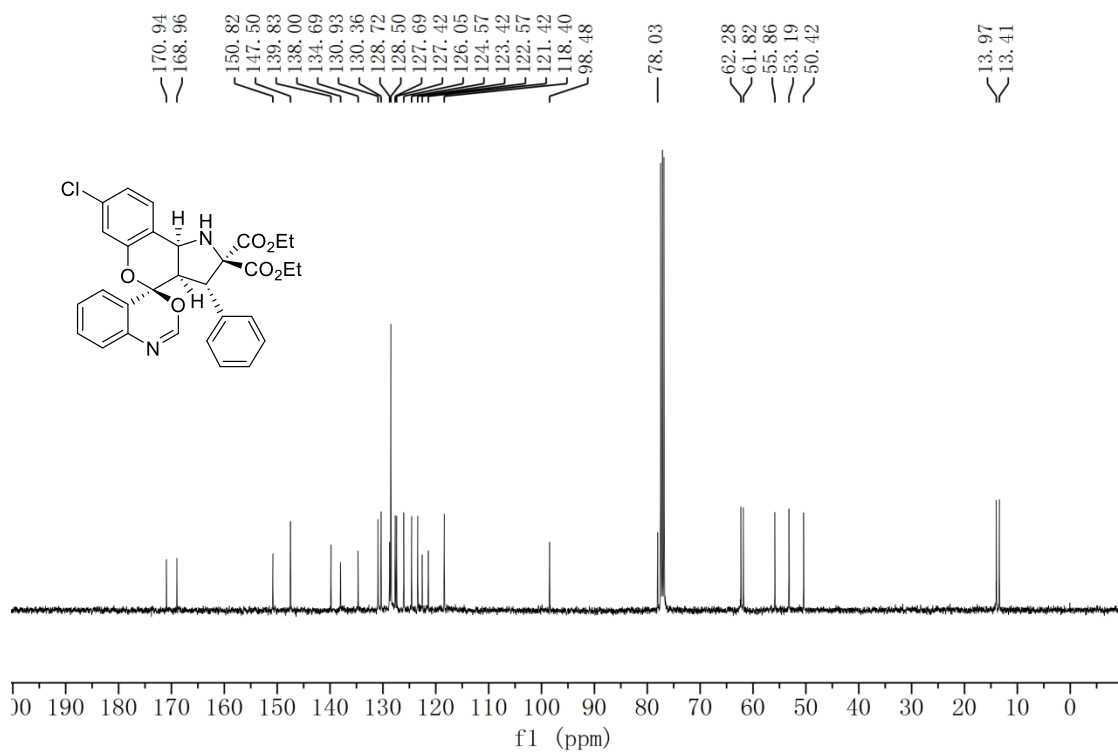

# Compound 4j

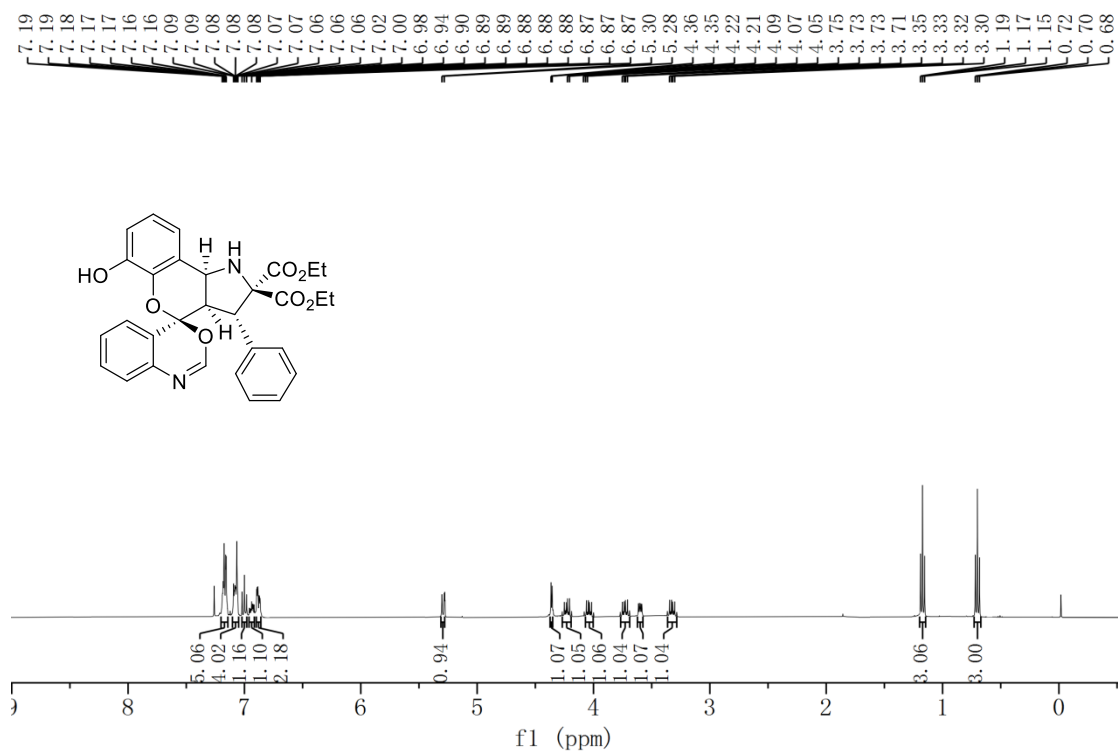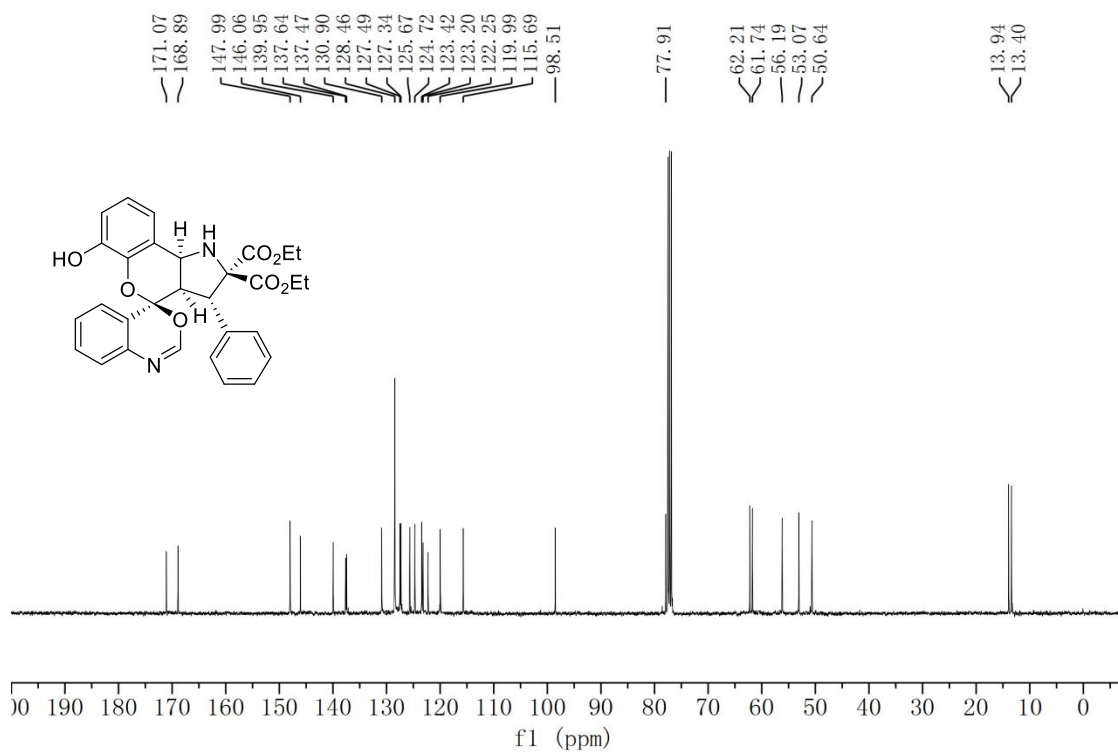



# Compound 4k

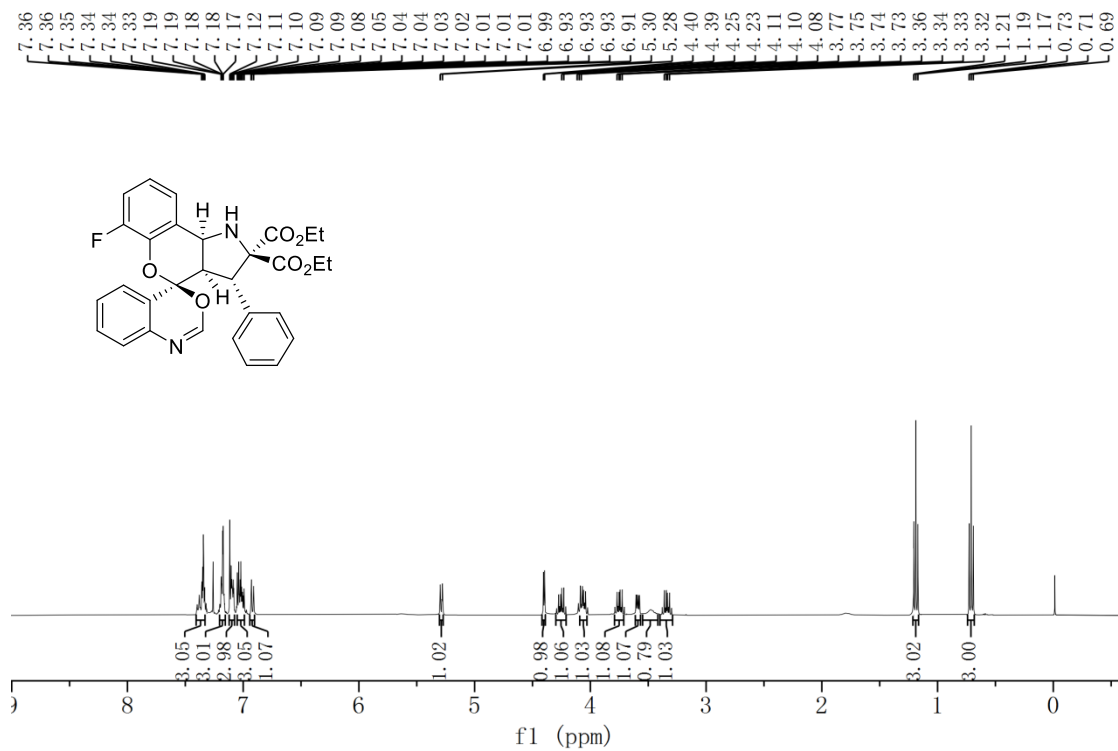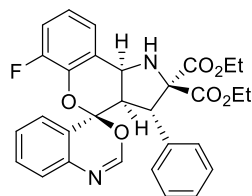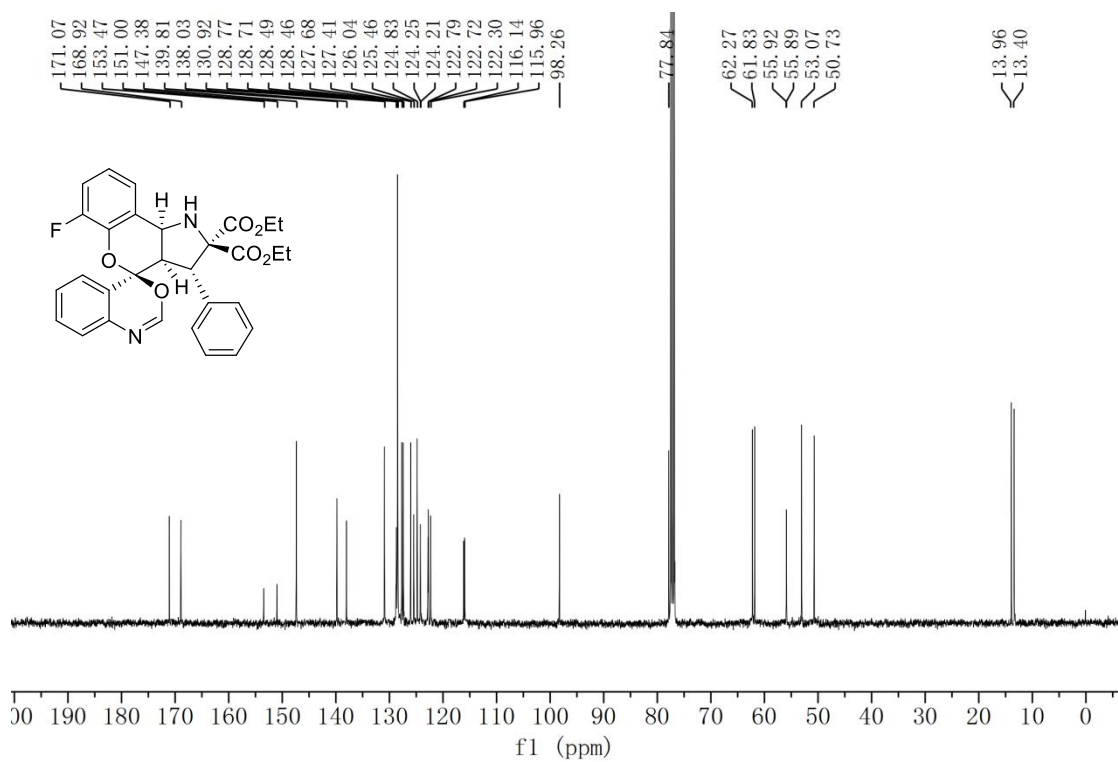

# Compound 4I

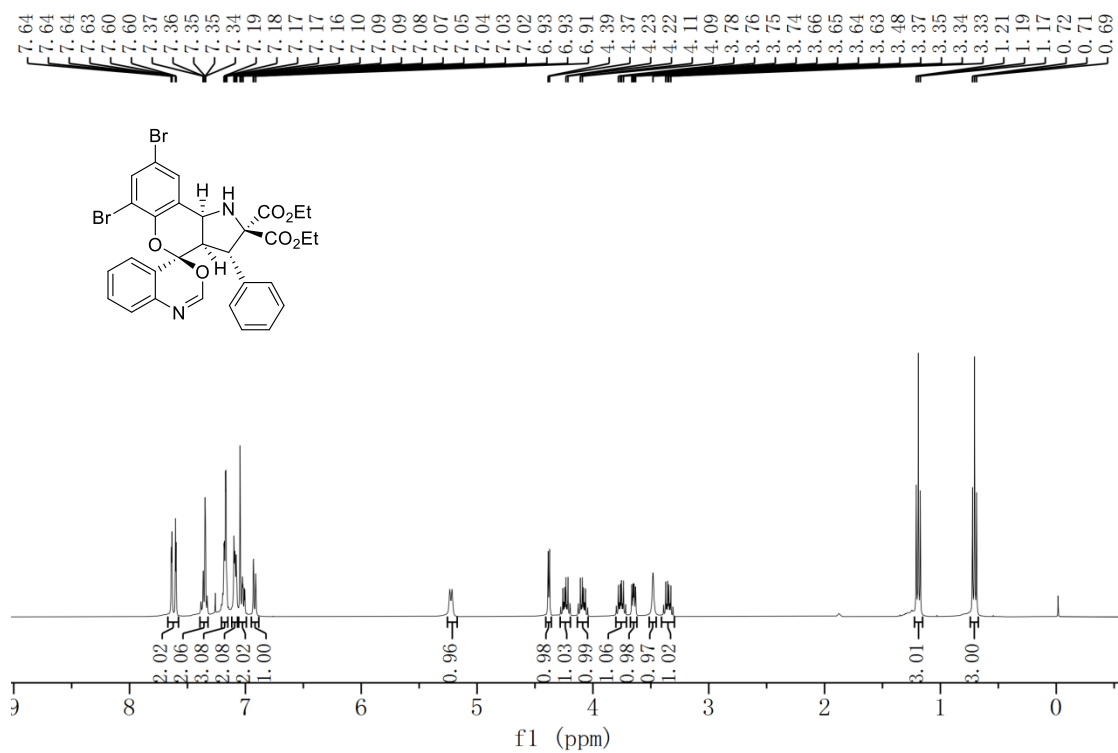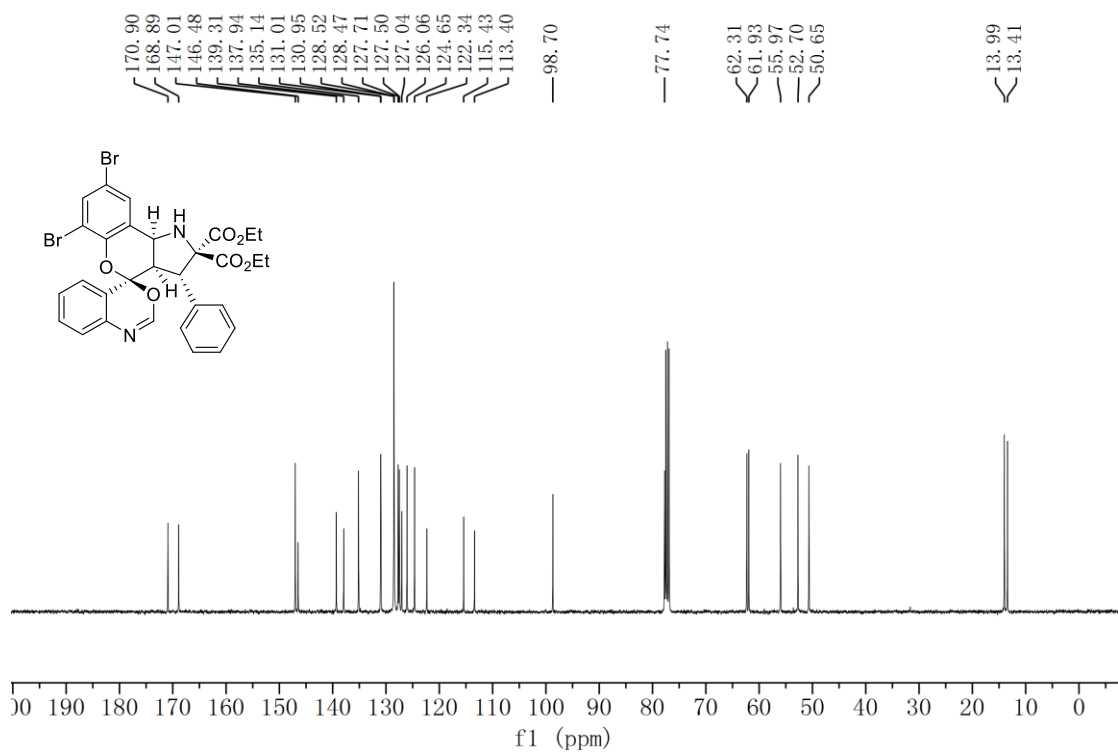

# Compound 4m

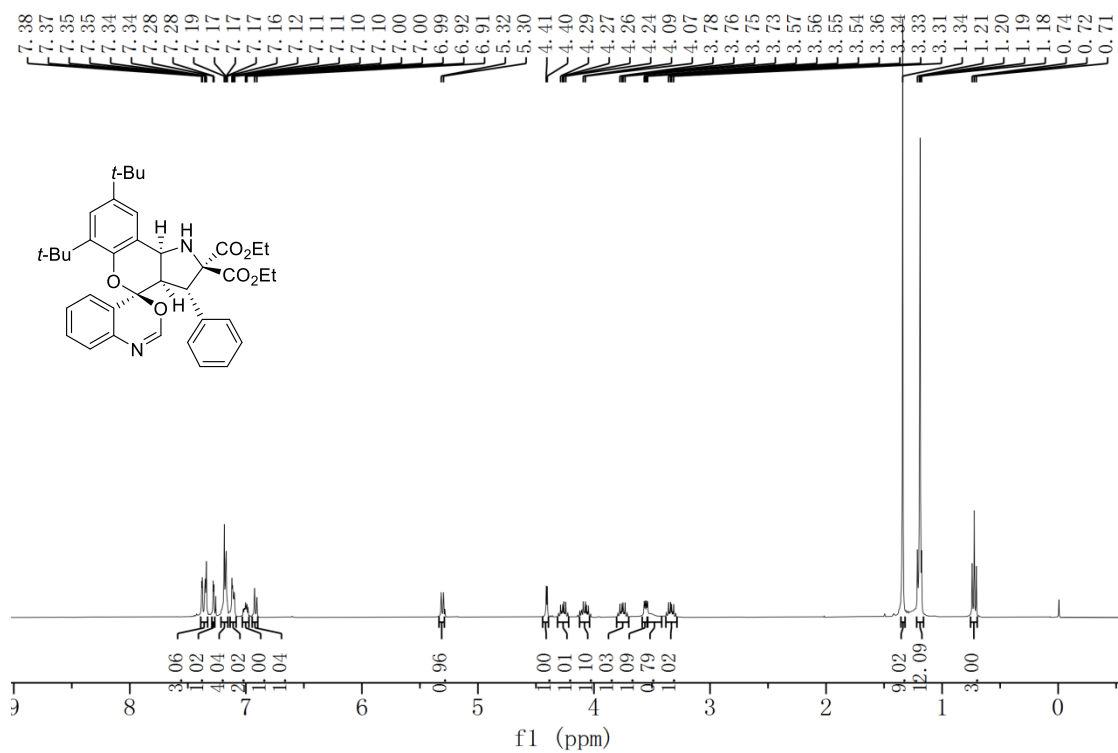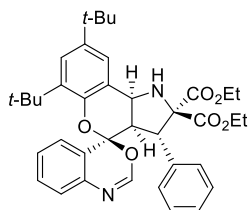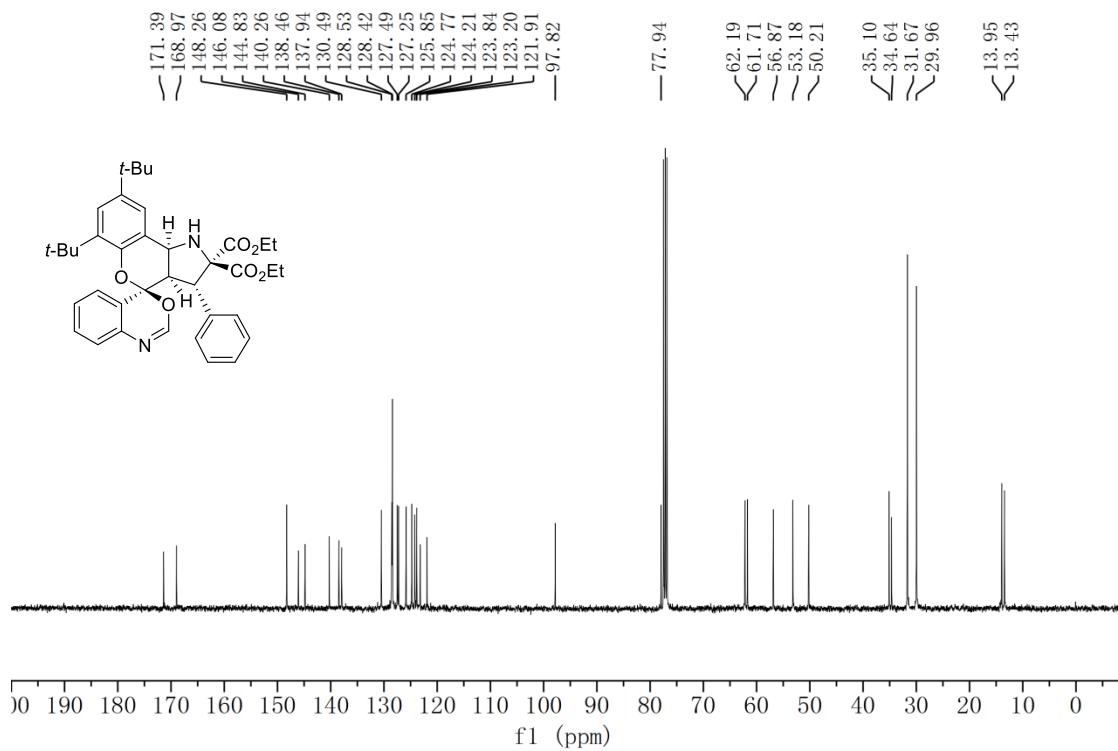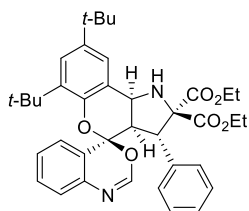

# Compound 4n

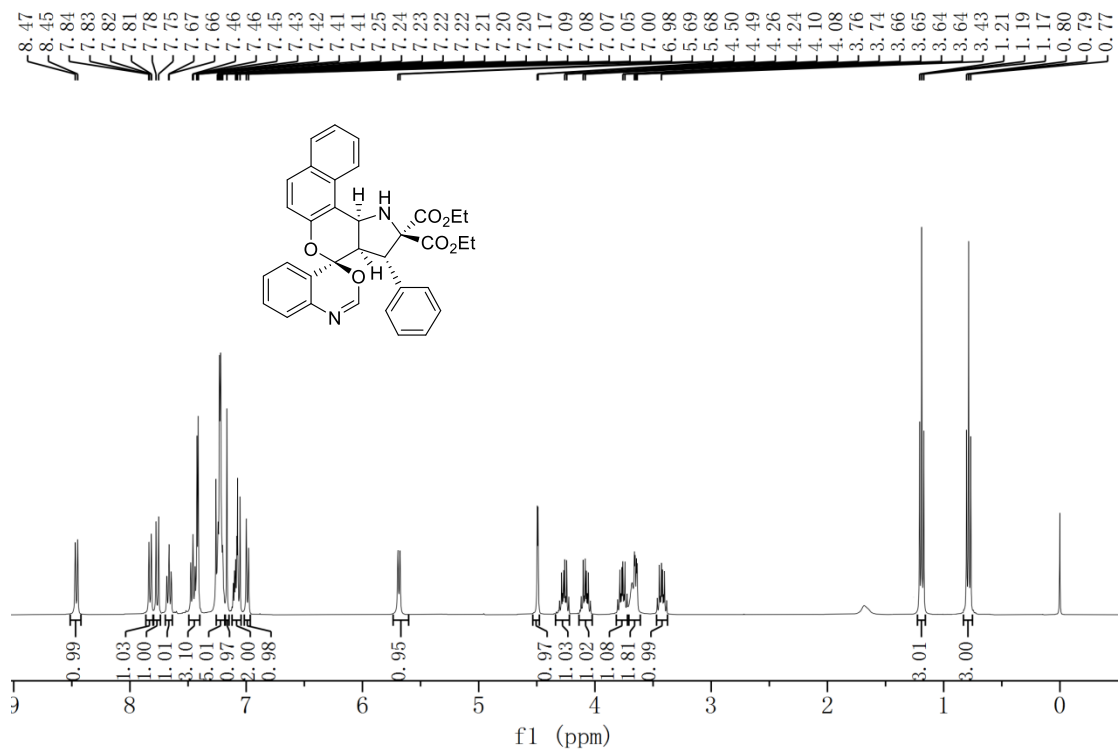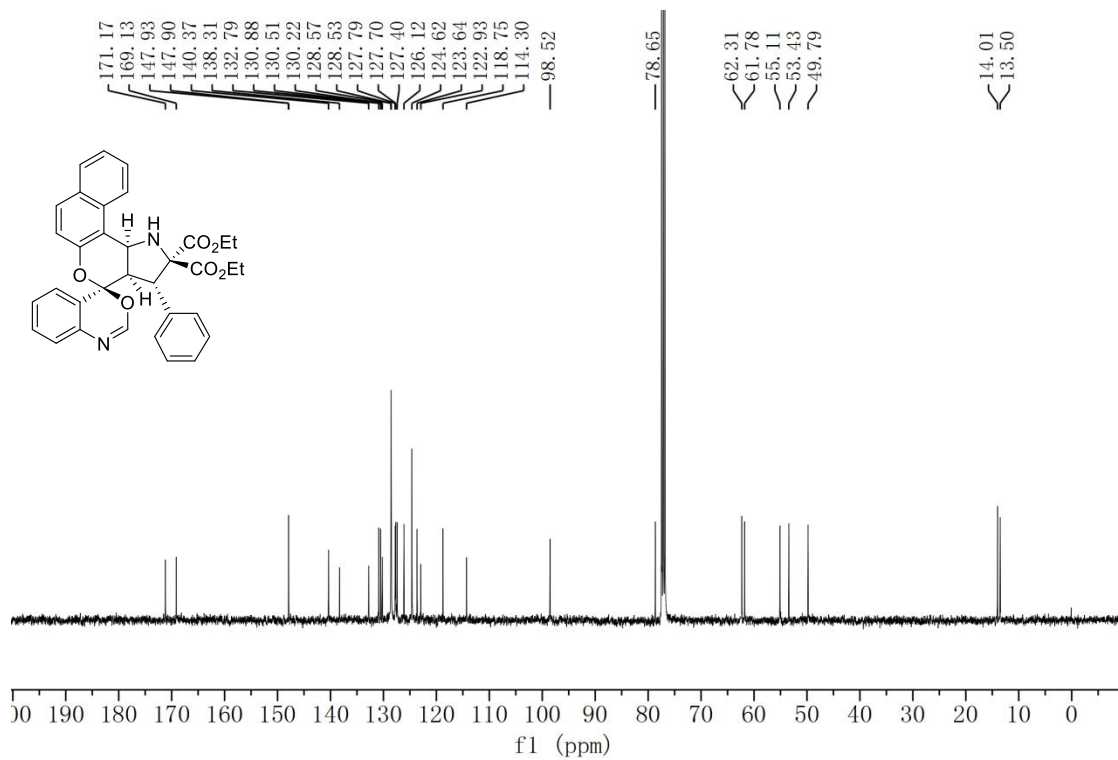

# Compound 3'a

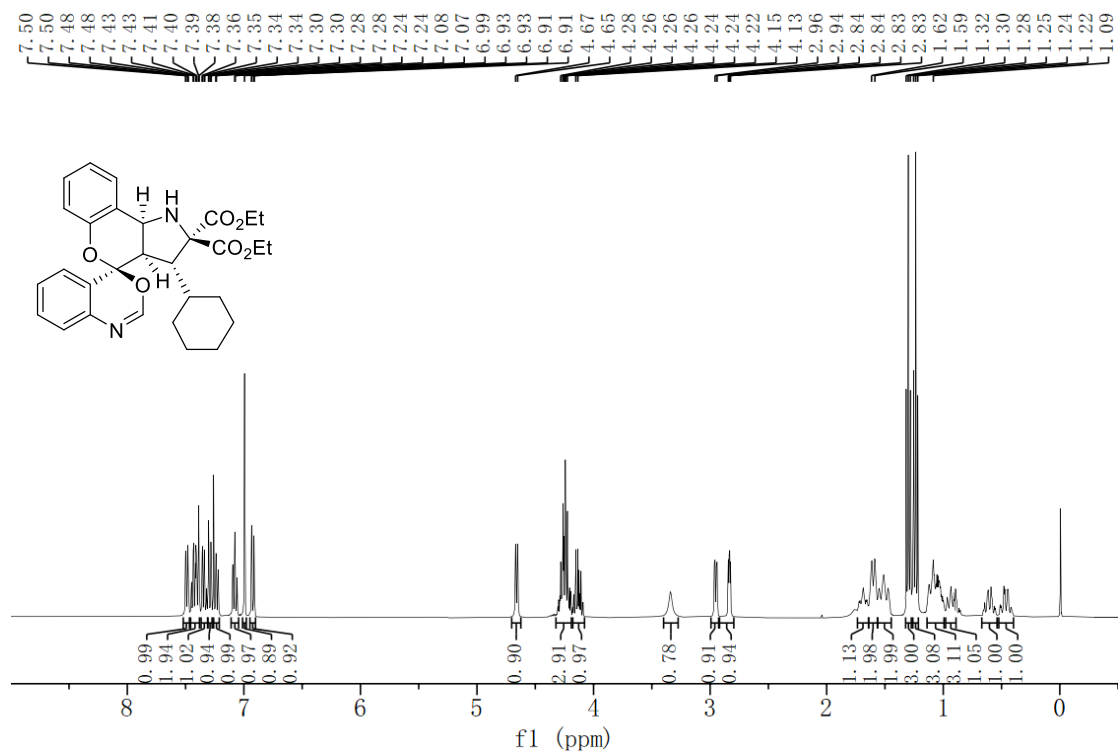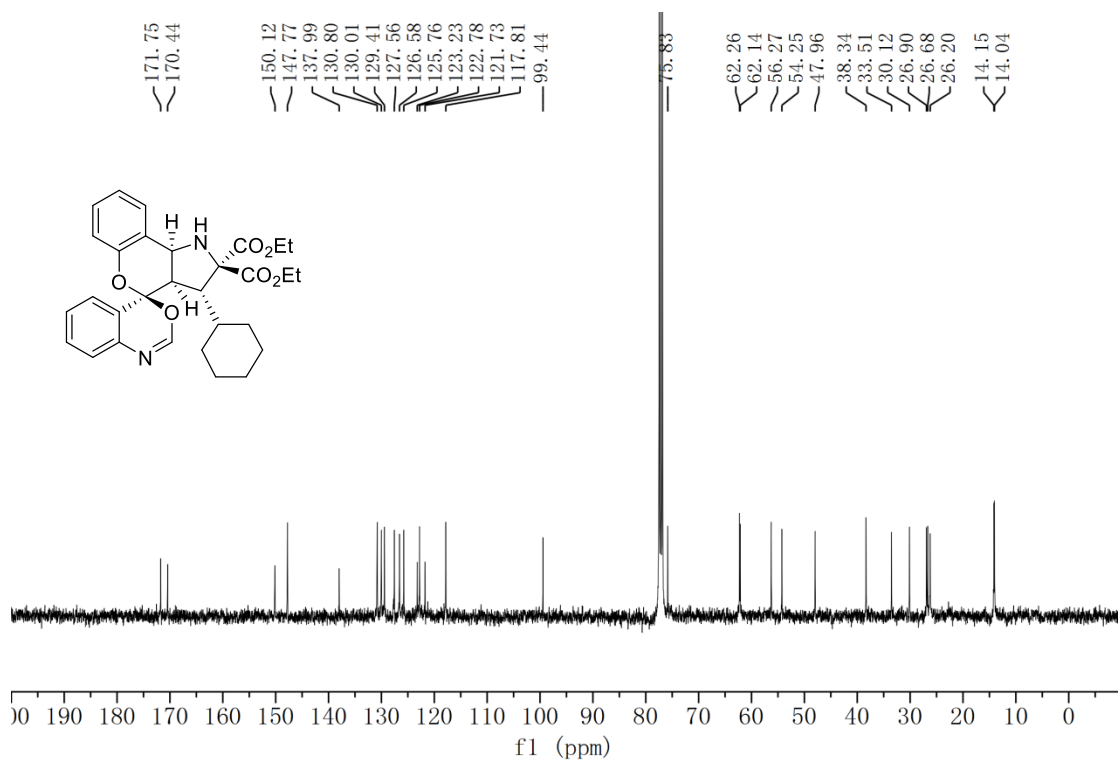

# Compound 6a

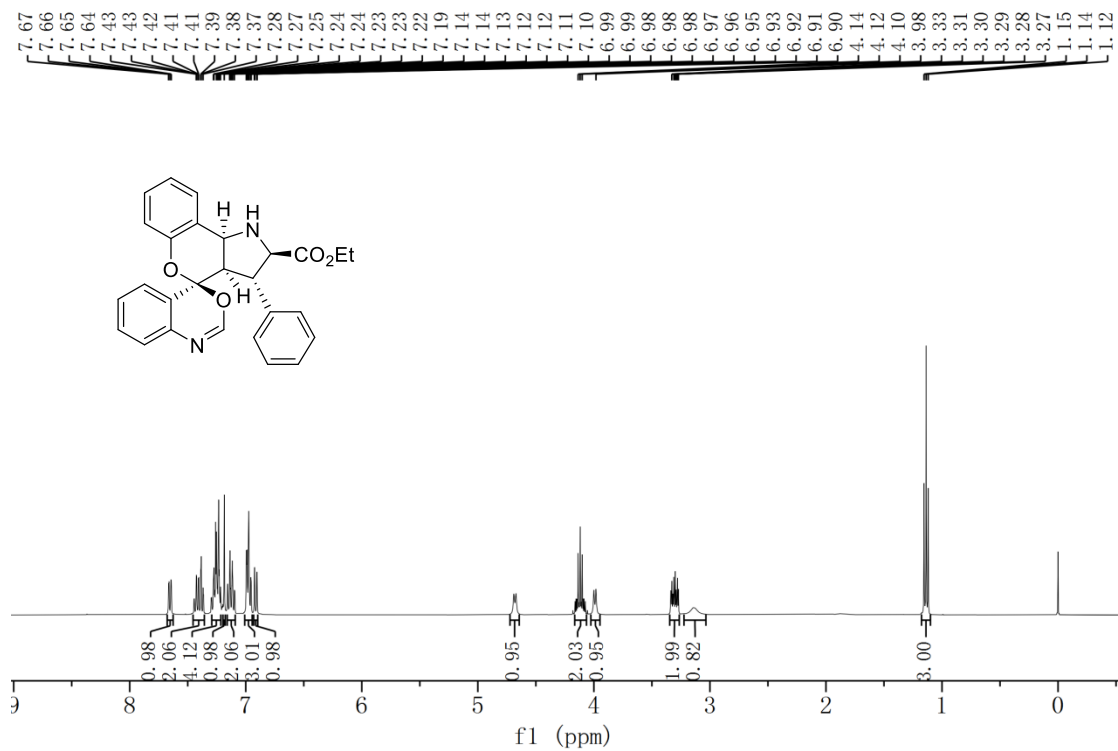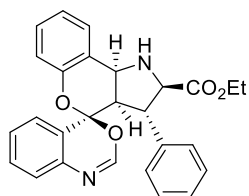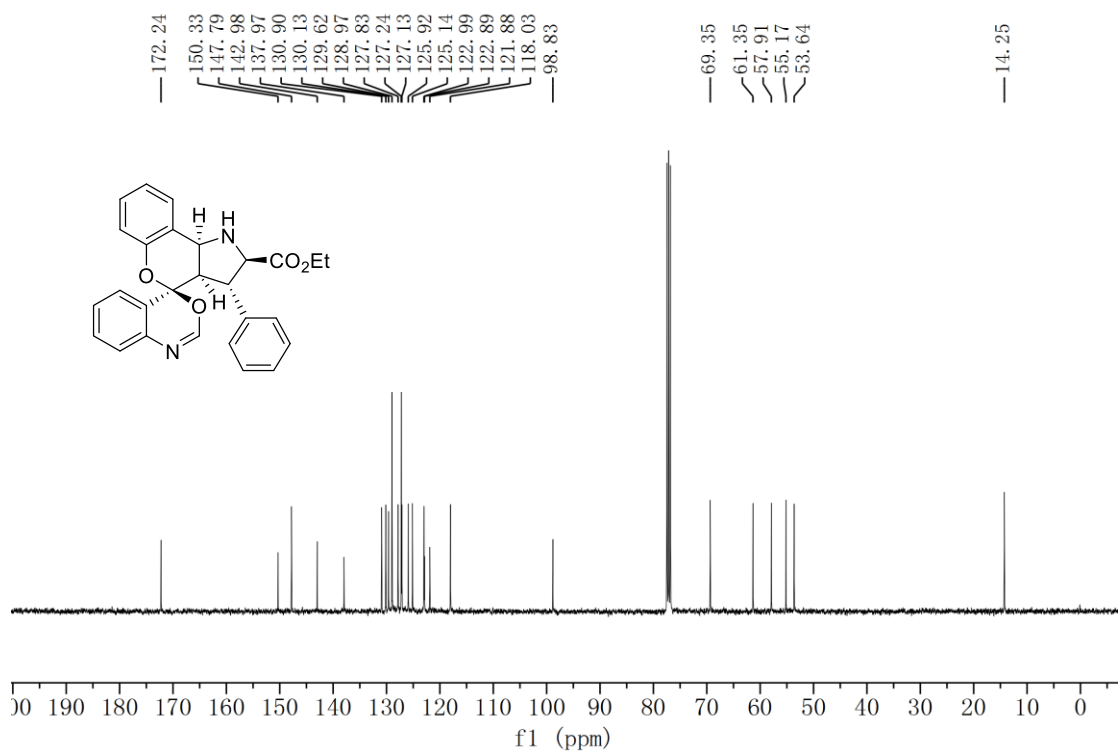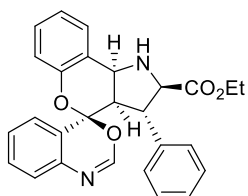

Supplement: d2cc02454c1.pdf [file d2cc02454c1.pdf]
